# Supplementary material for: Solvent controlled synthesis of 2,3-diarylepoxy indenones and α-hydroxy diarylindanones and their evaluation as inhibitors of DNA alkylation repair
Source: Royal Society of Chemistry journal article supplement (doi:10.1039/d2ob00595f), 2022-01-01
Supplement: d2ob00595f1.pdf [file d2ob00595f1.pdf]

## Solvent Controlled Synthesis of 2,3-Diarylepoxy Indenone, $\alpha$ -Hydroxy Diarylindanones and their Evaluation as Inhibitors of DNA Alkylation Repair

Rollania Negi<sup>1</sup>, Tapan Kumar Jena<sup>1</sup>, Jyoti<sup>1</sup>, Nikhil Kumar Tuti<sup>2</sup>, Roy Anindya<sup>2</sup>, Faiz Ahmed Khan<sup>1,\*</sup>

<sup>1</sup>Department of Chemistry, Indian Institute of Technology Hyderabad, Kandi – 502 285, Sangareddy, Telangana, INDIA

<sup>2</sup>Department of Biotechnology, Indian Institute of Technology Hyderabad, Kandi – 502 285, Sangareddy, Telangana, INDIA

\* corresponding author: Anindya Roy, E-mail: anindya@bt.iith.ac.in; Faiz Ahmed Khan, E-mail: faiz@chy.iith.ac.in

1. <sup>1</sup>H, <sup>13</sup>C NMR spectrum of compounds **2**, **3**, **1**, **4**.....S2-S79
2. X-ray crystallography Data of compound **2a**, **3ab**, **3ac**.....S80-S84

# 1. Copies of NMR Spectrum:

$^1\text{H}$  (400 MHz) and  $^{13}\text{C}$  (100 MHz) NMR in  $\text{CDCl}_3$  of Compound 2a

7.79  
7.77  
7.32  
7.25  
7.23  
7.20  
7.18  
7.14  
7.13  
7.10  
7.09

2.41  
2.30  
2.27

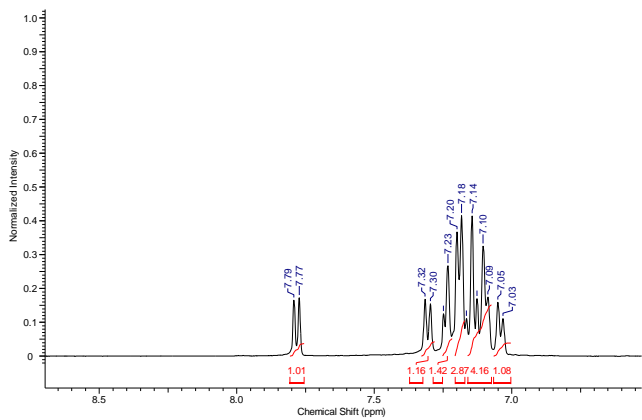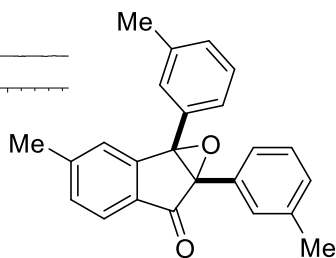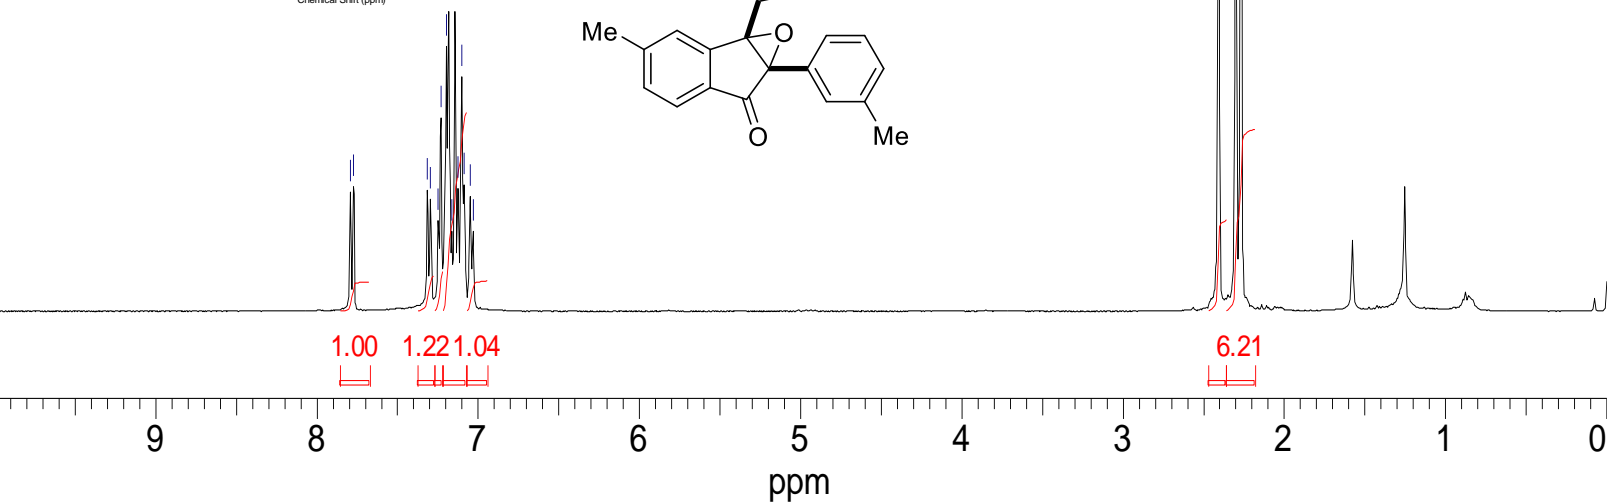

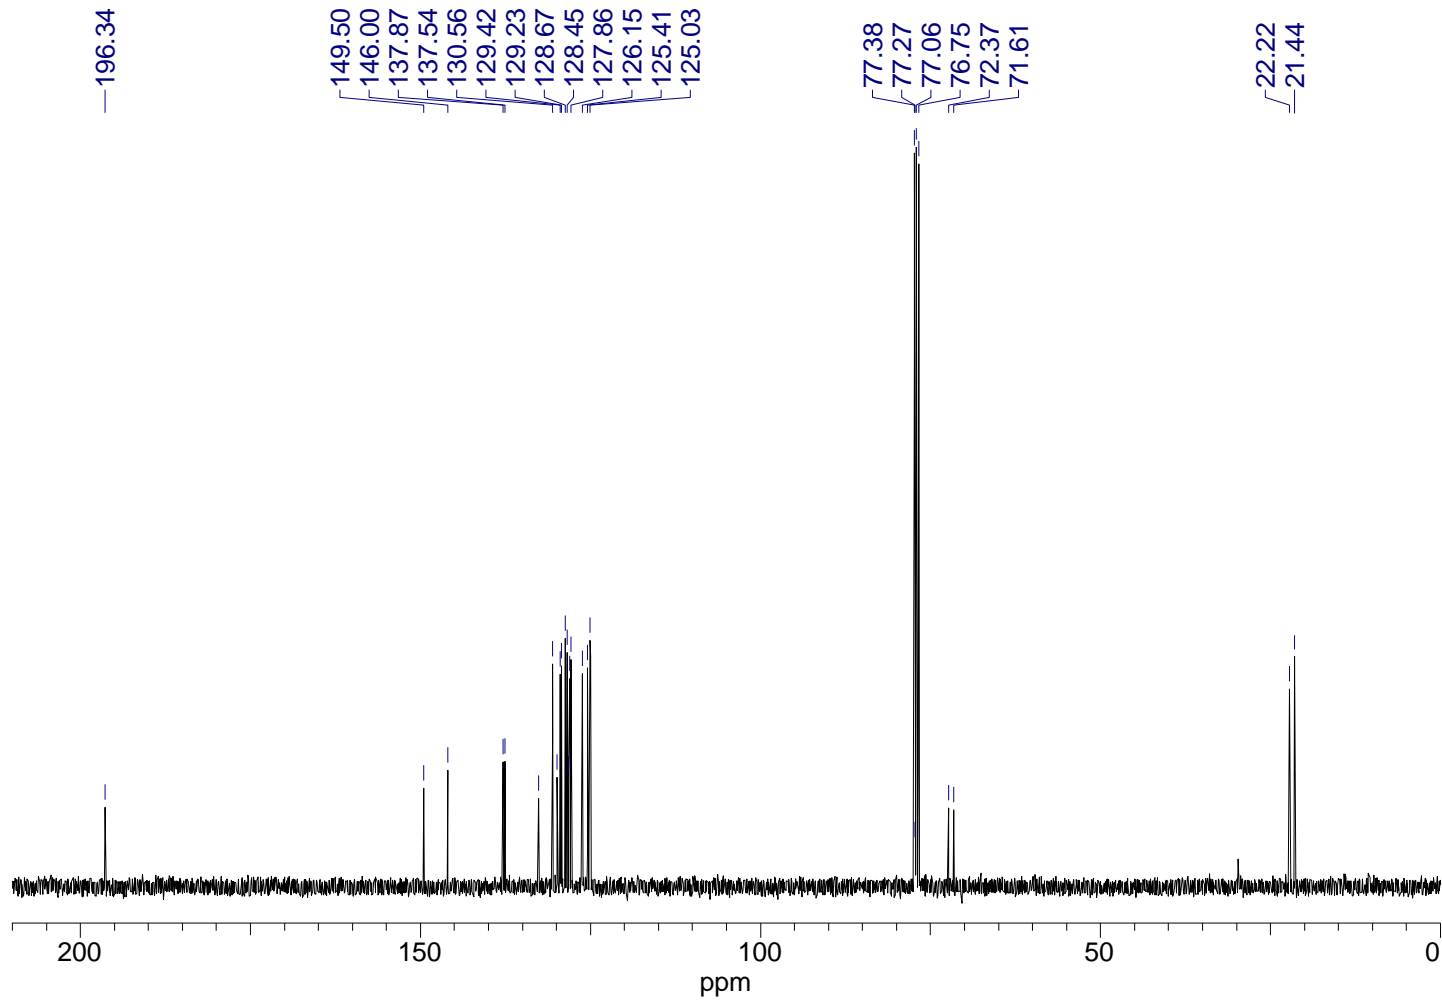

<sup>1</sup>H (400 MHz) and <sup>13</sup>C (100 MHz) NMR in CDCl<sub>3</sub> of Compound 2b

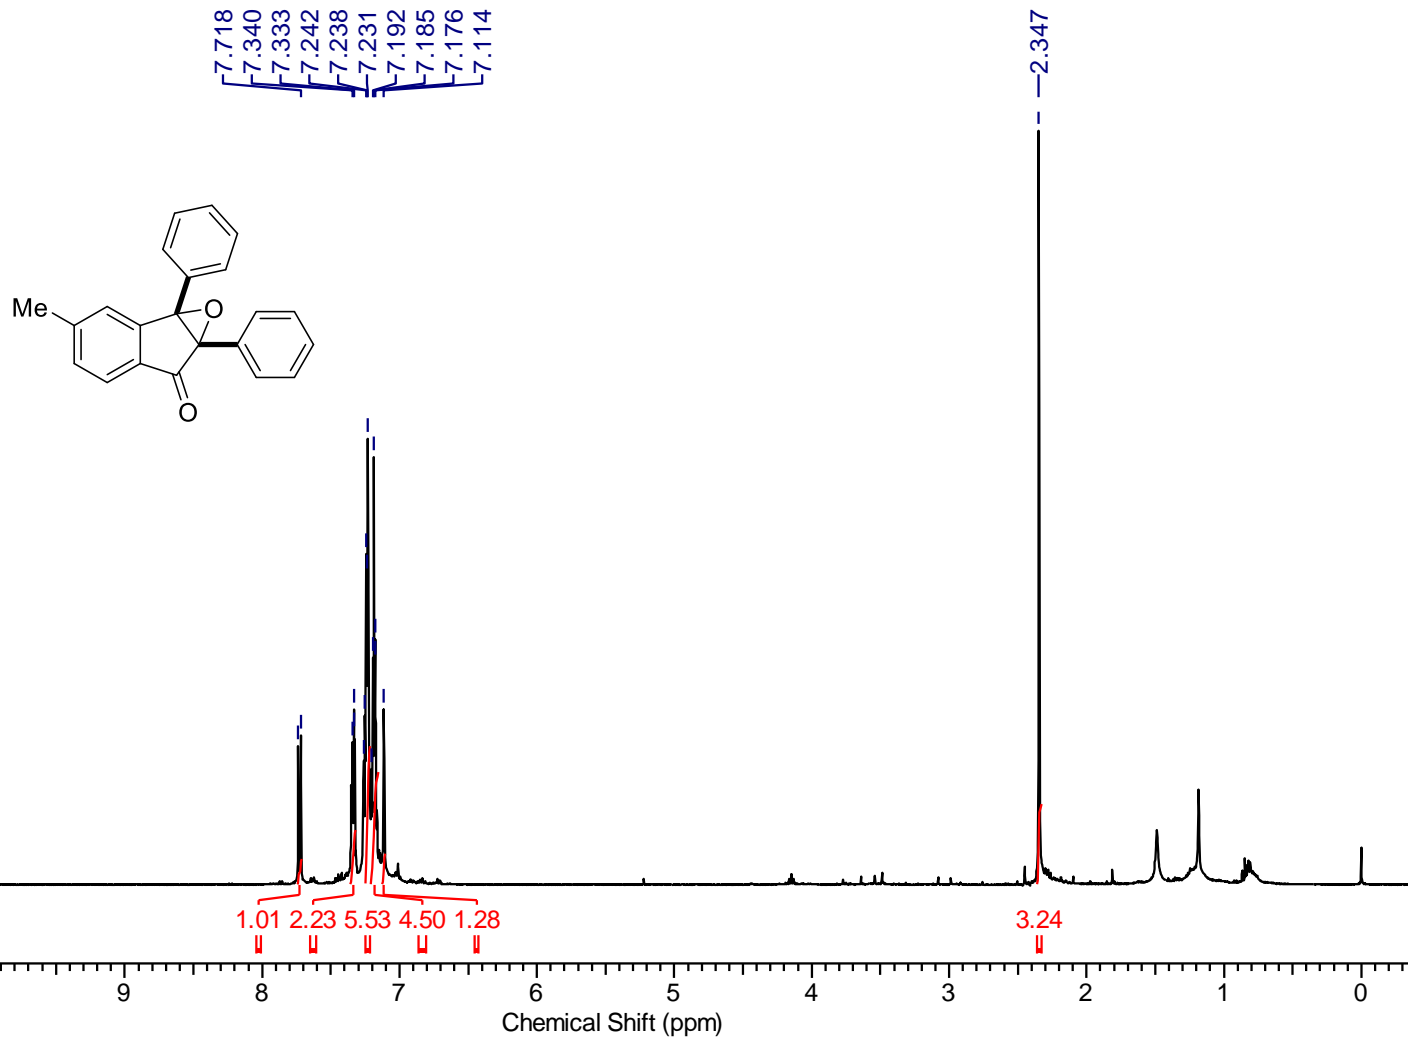

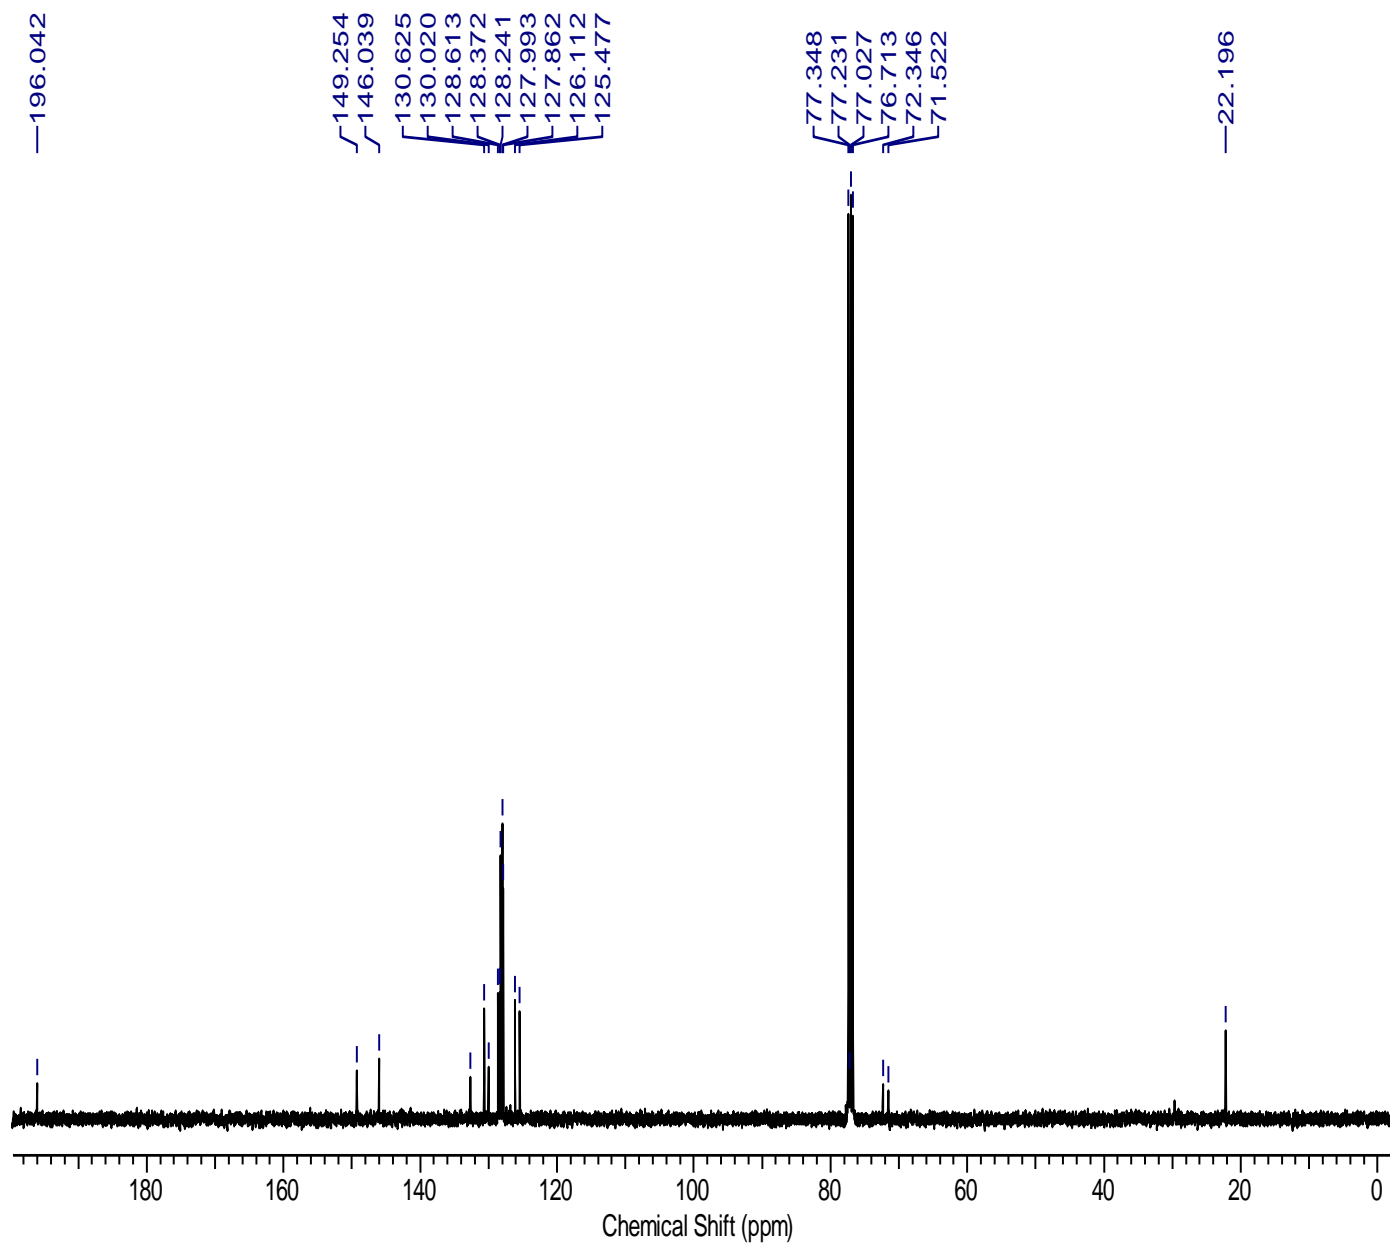

$^1\text{H}$  (400 MHz) and  $^{13}\text{C}$  (100 MHz) NMR in  $\text{CDCl}_3$  of Compound 2c

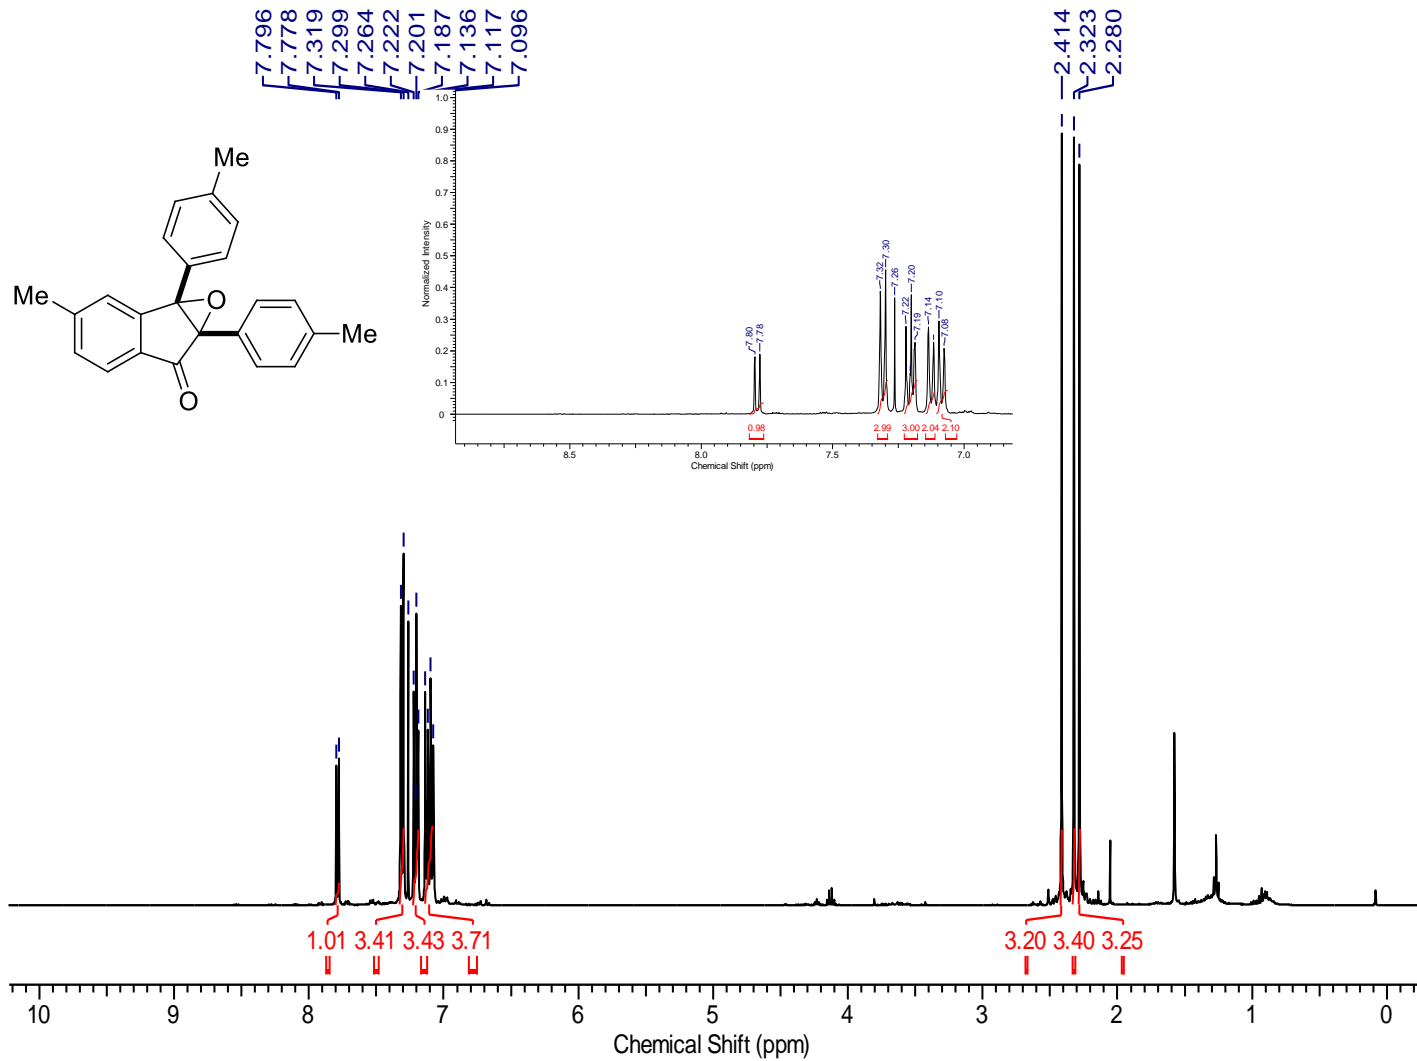

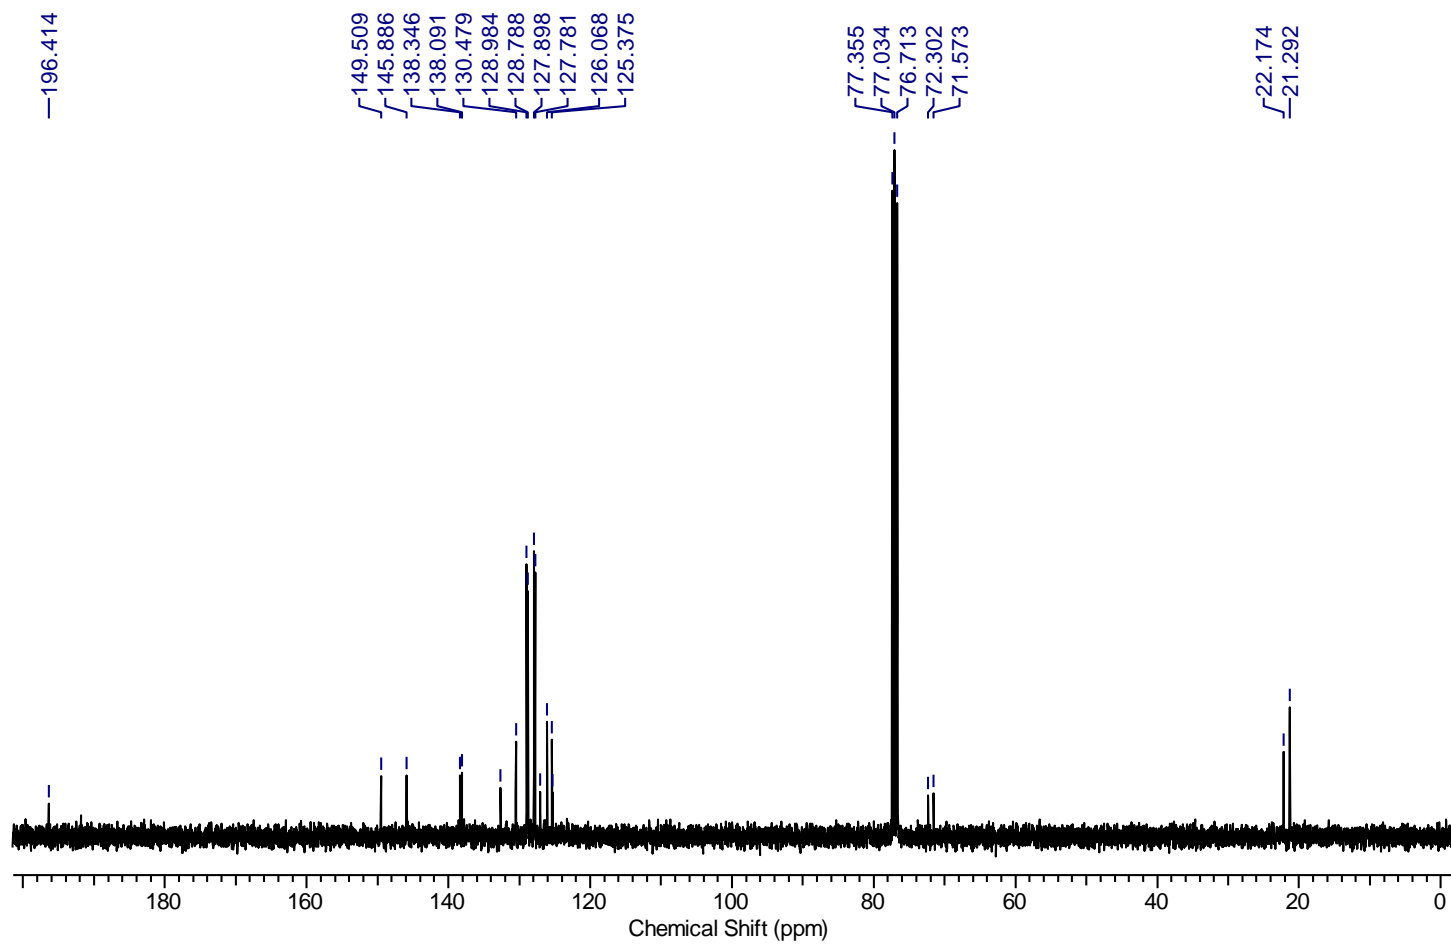

**$^1\text{H}$  (400 MHz) and  $^{13}\text{C}$  (100 MHz) NMR in  $\text{CDCl}_3$  of Compound 2d**

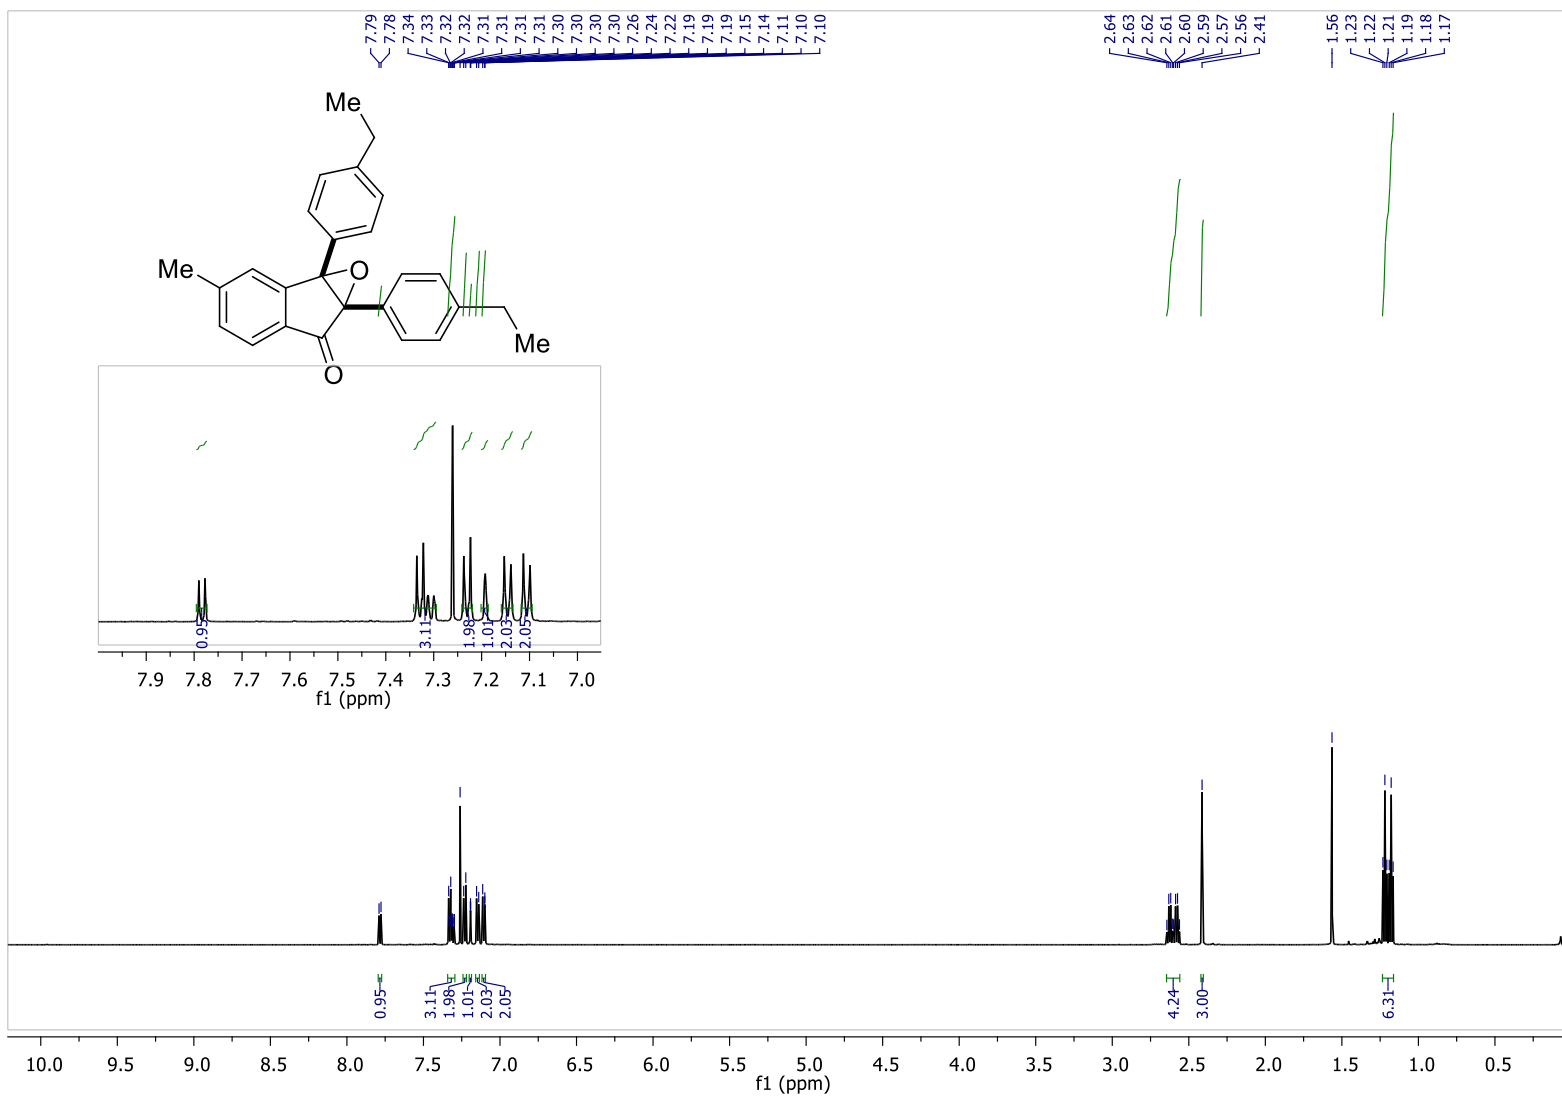



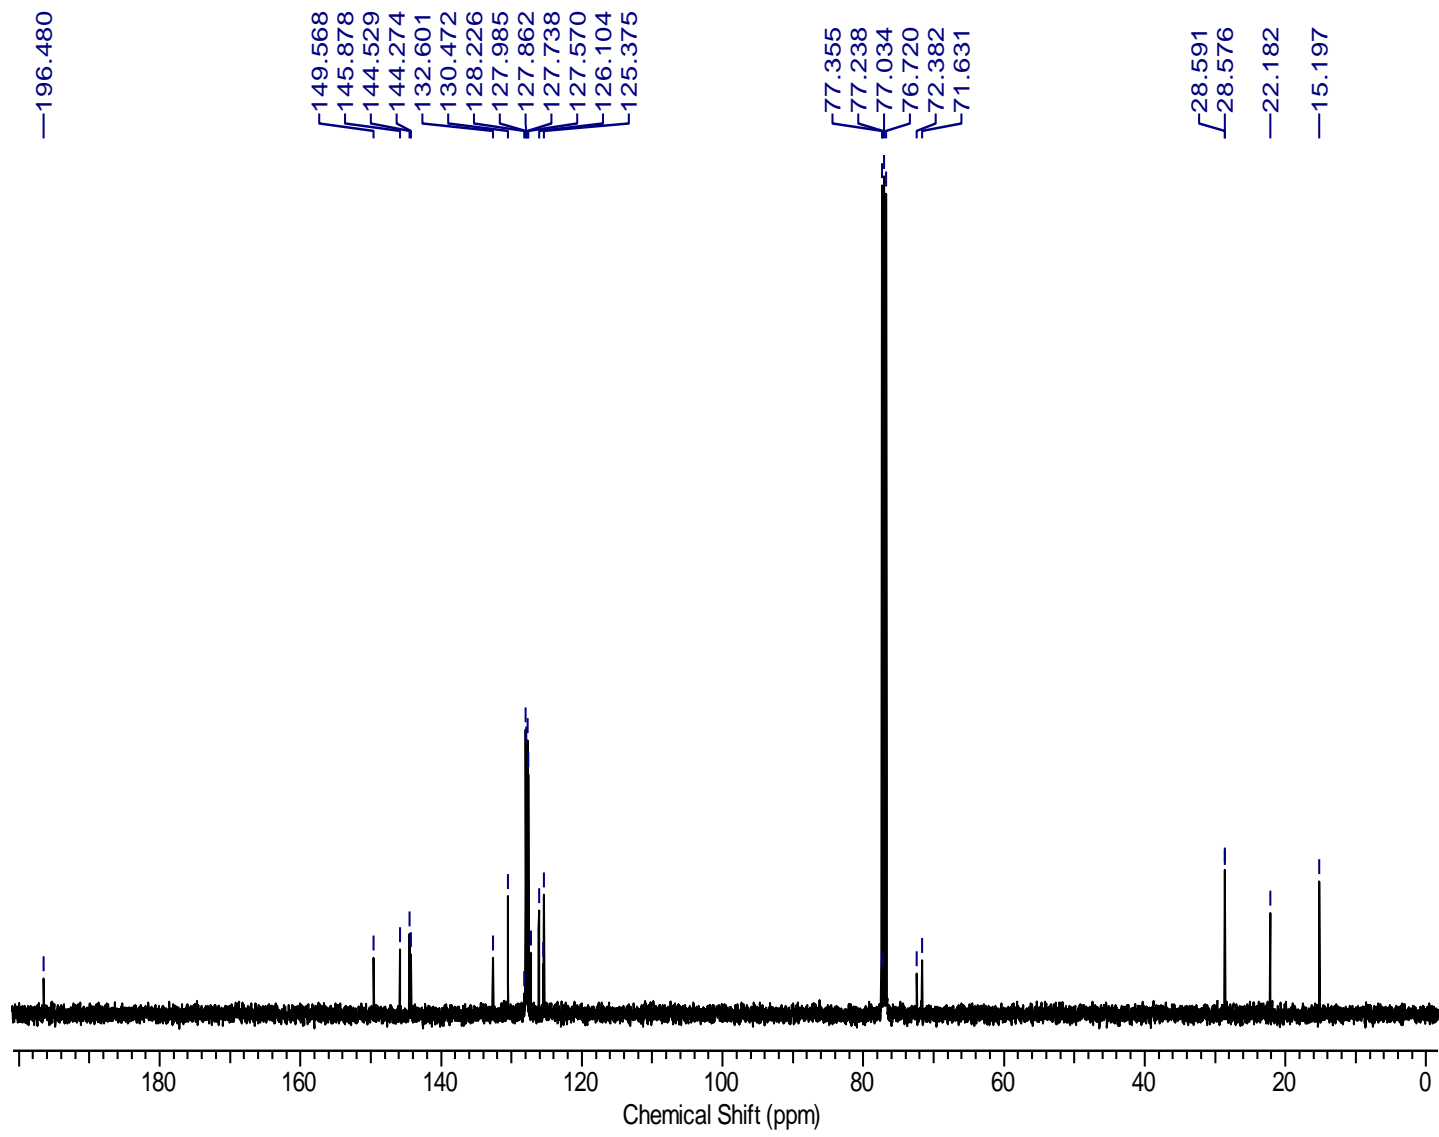

<sup>1</sup>H (400 MHz) and <sup>13</sup>C (100 MHz) NMR in CDCl<sub>3</sub> of Compound 2e

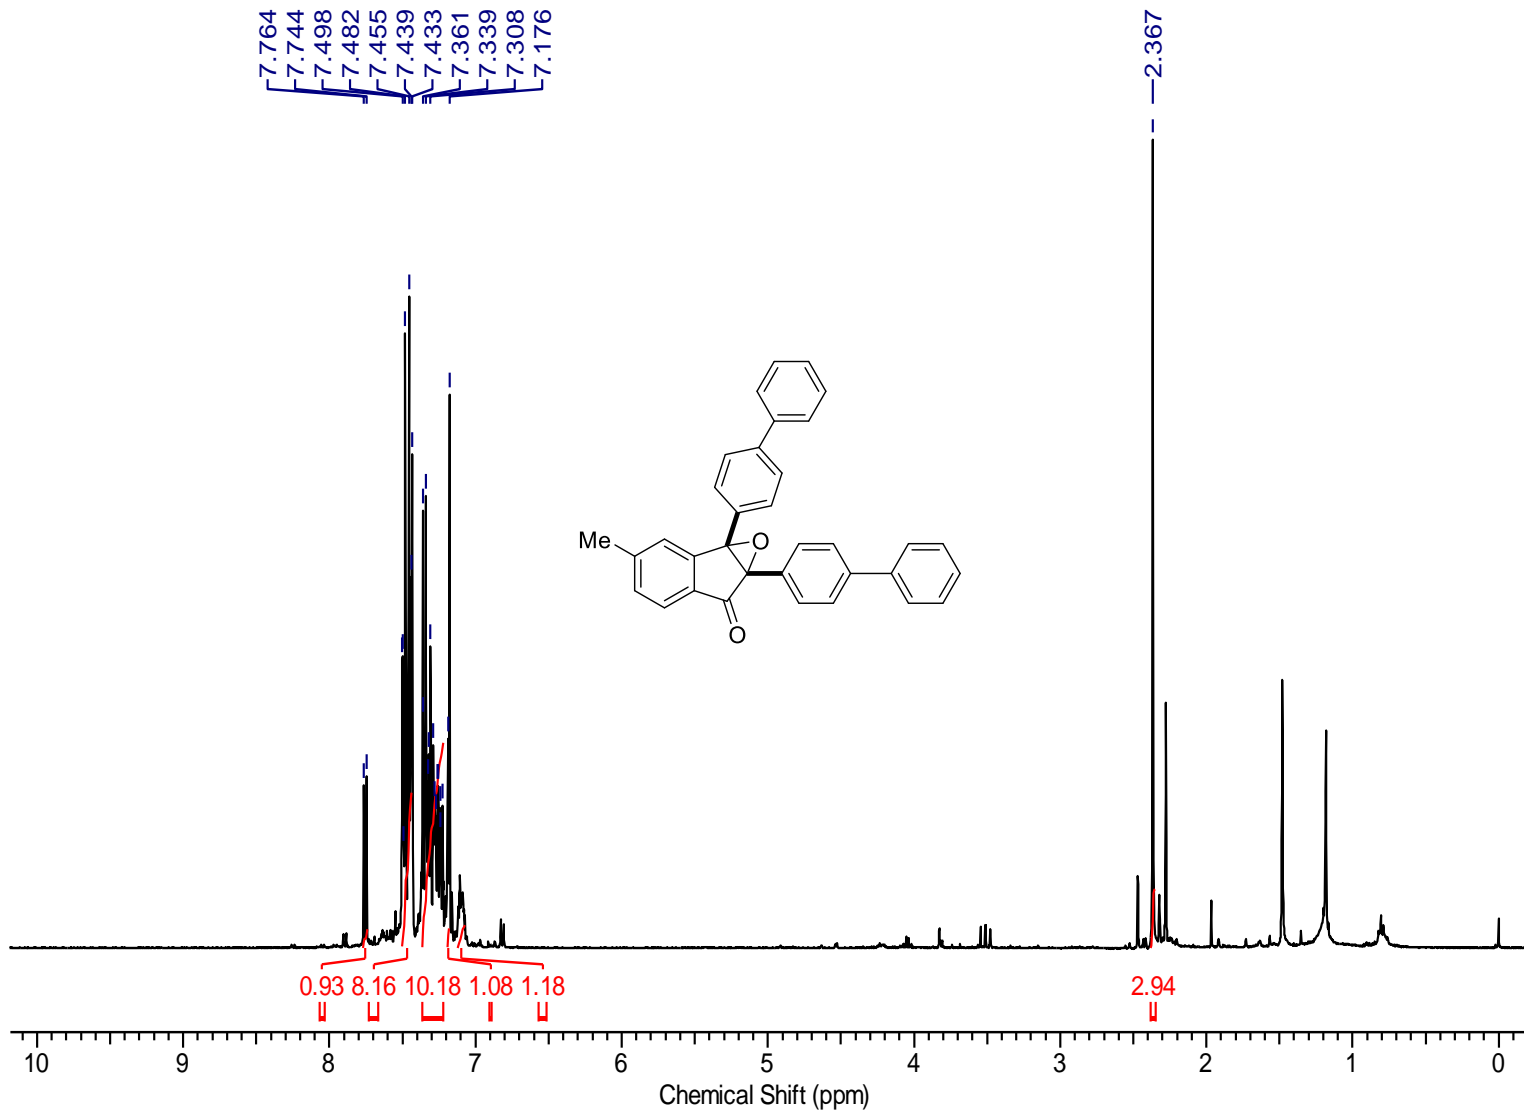

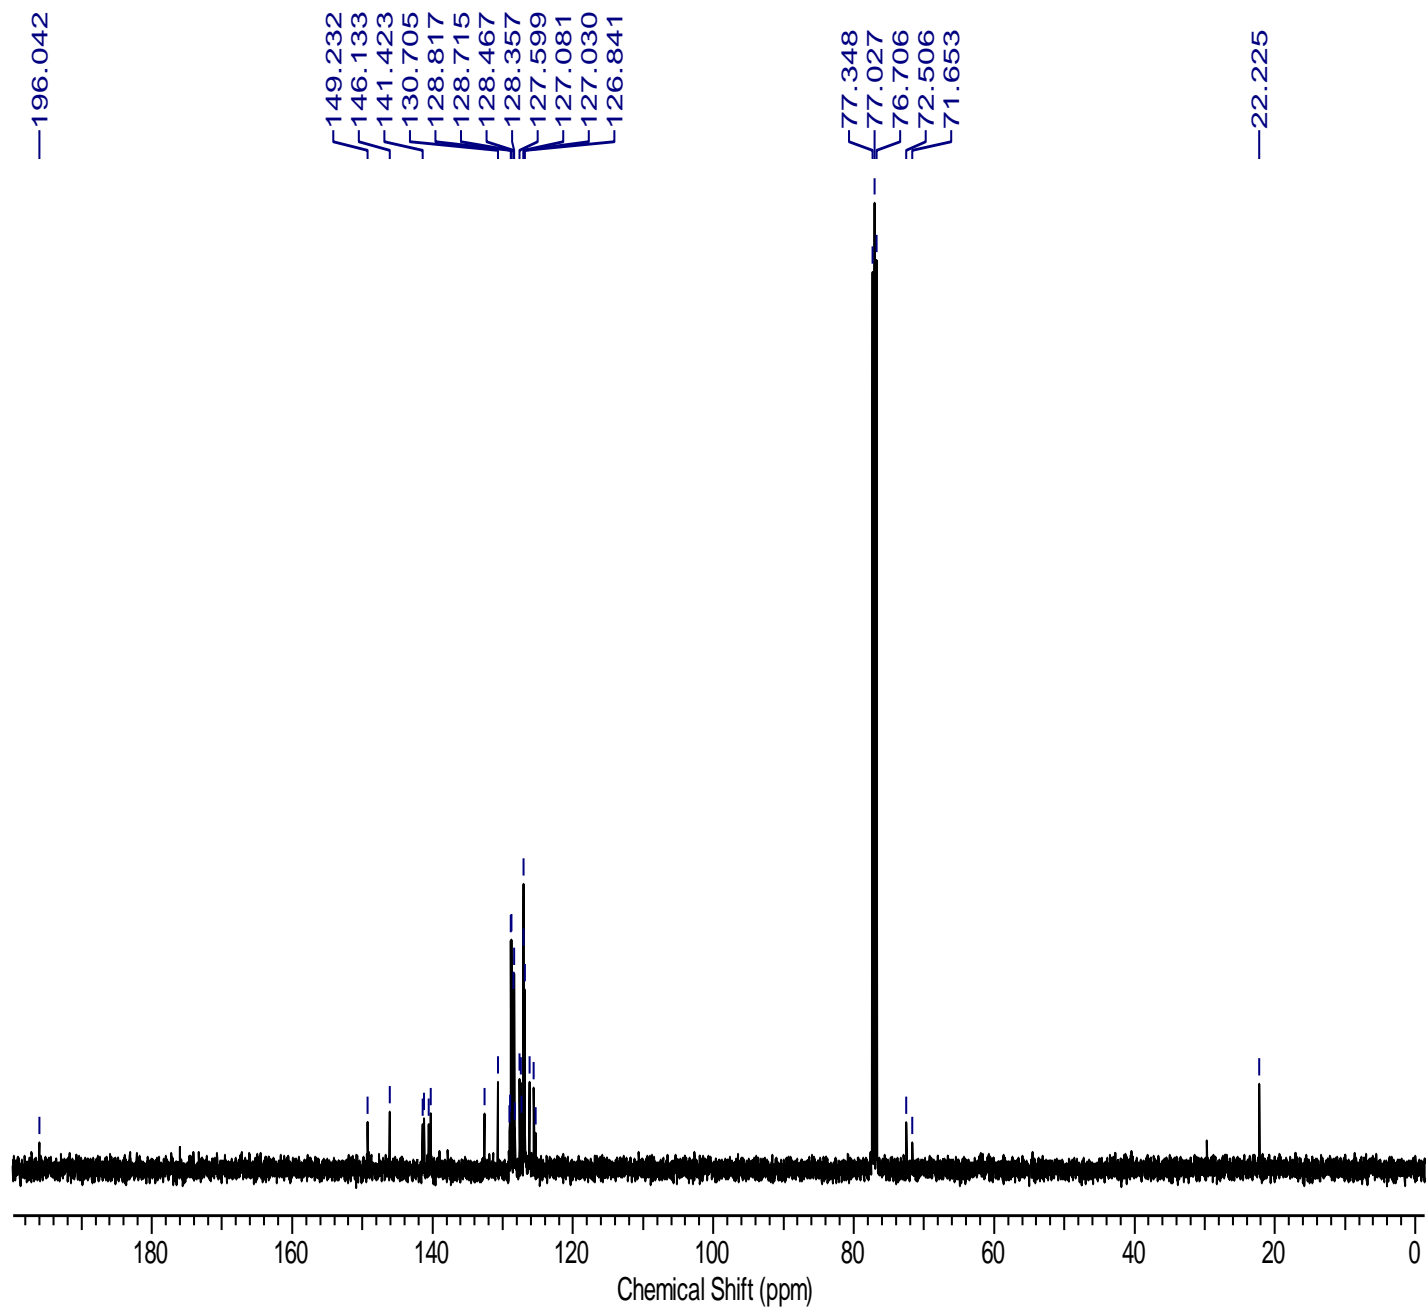

**<sup>1</sup>H (400 MHz) and <sup>13</sup>C (100 MHz) NMR in CDCl<sub>3</sub> of Compound 2f**

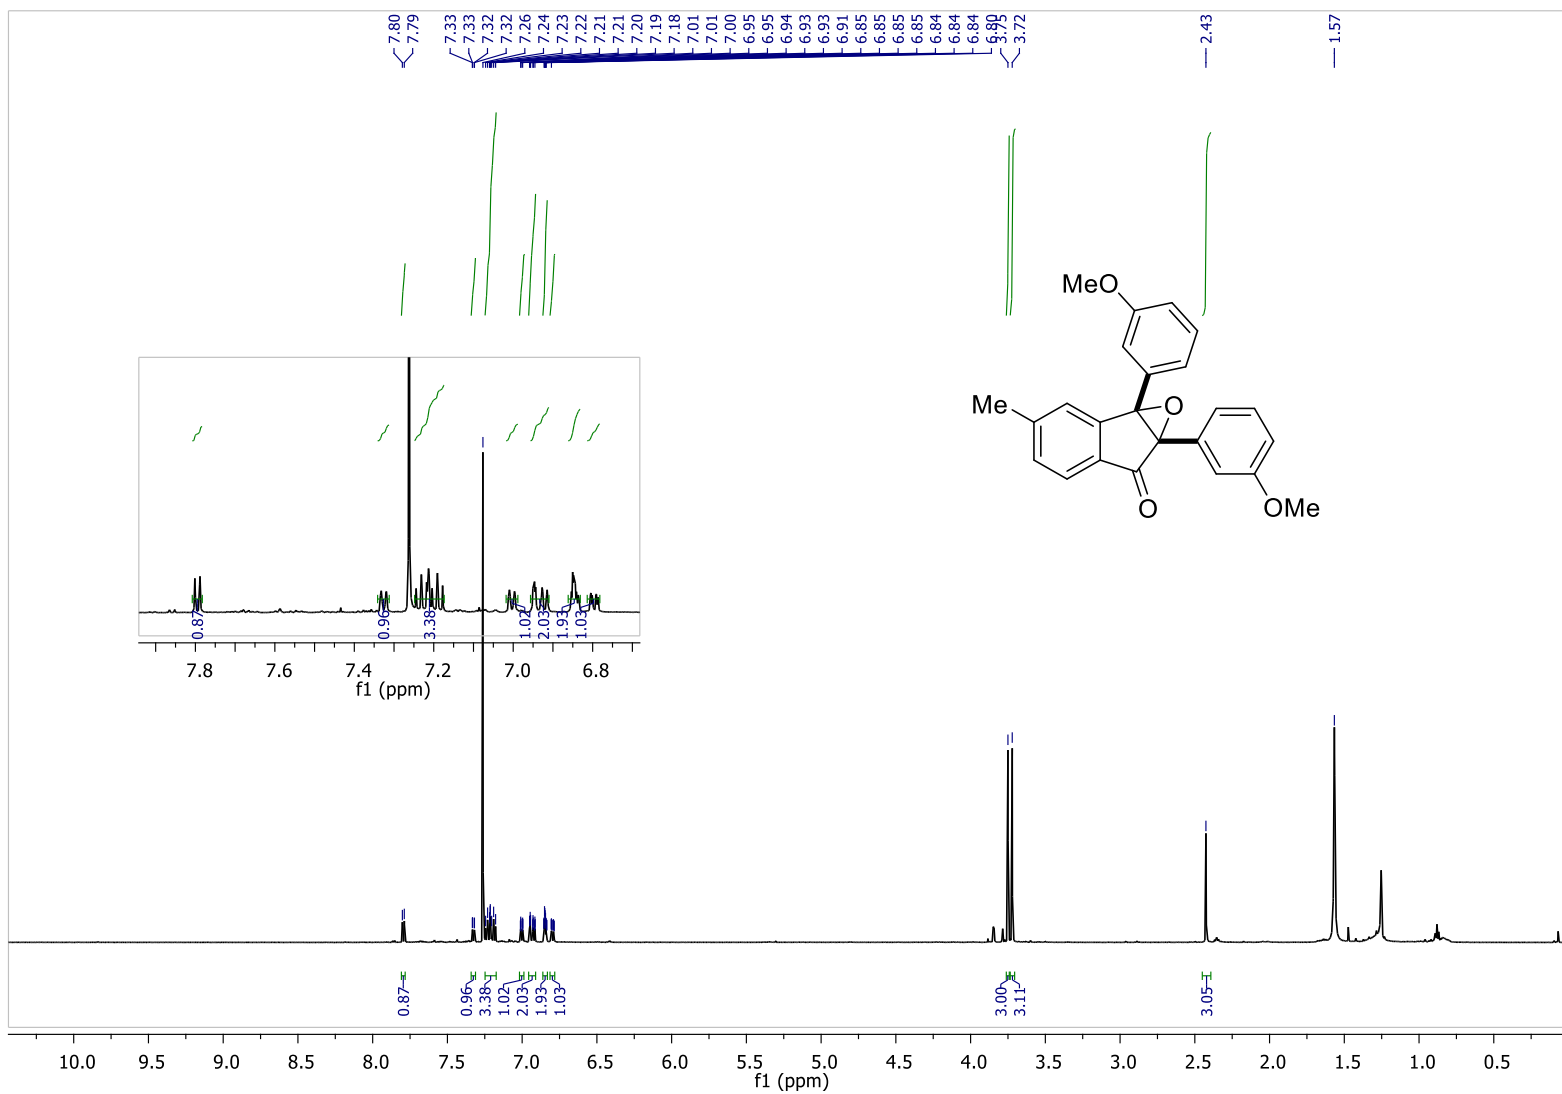

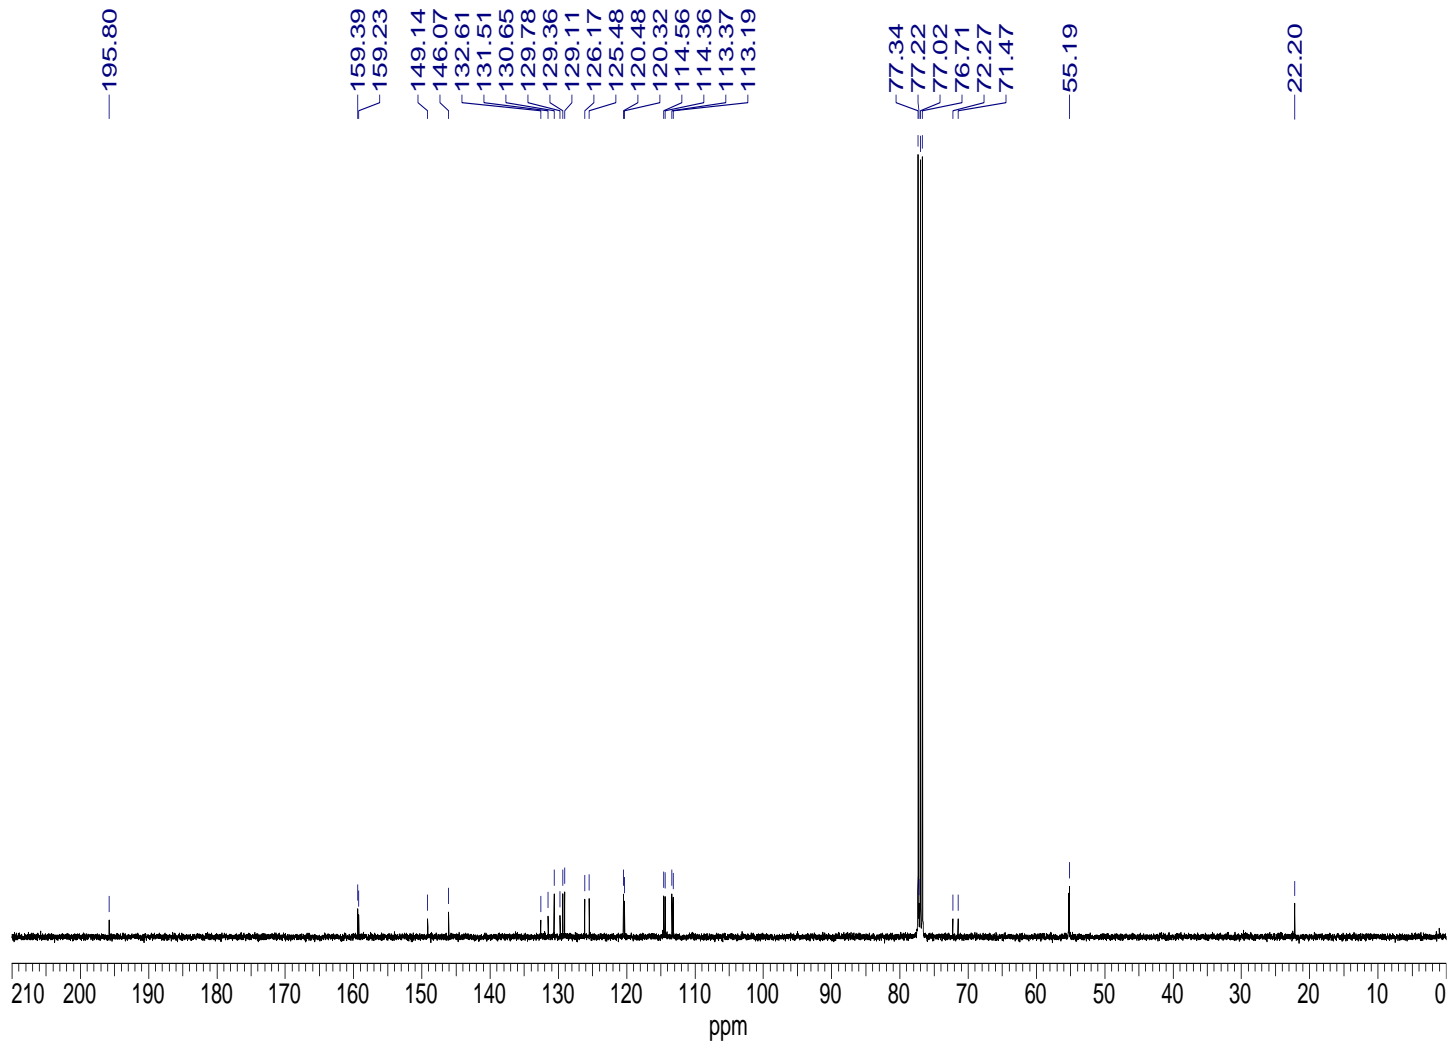

**$^1\text{H}$  (400 MHz) and  $^{13}\text{C}$  (100 MHz) NMR in  $\text{CDCl}_3$  of Compound 2g**

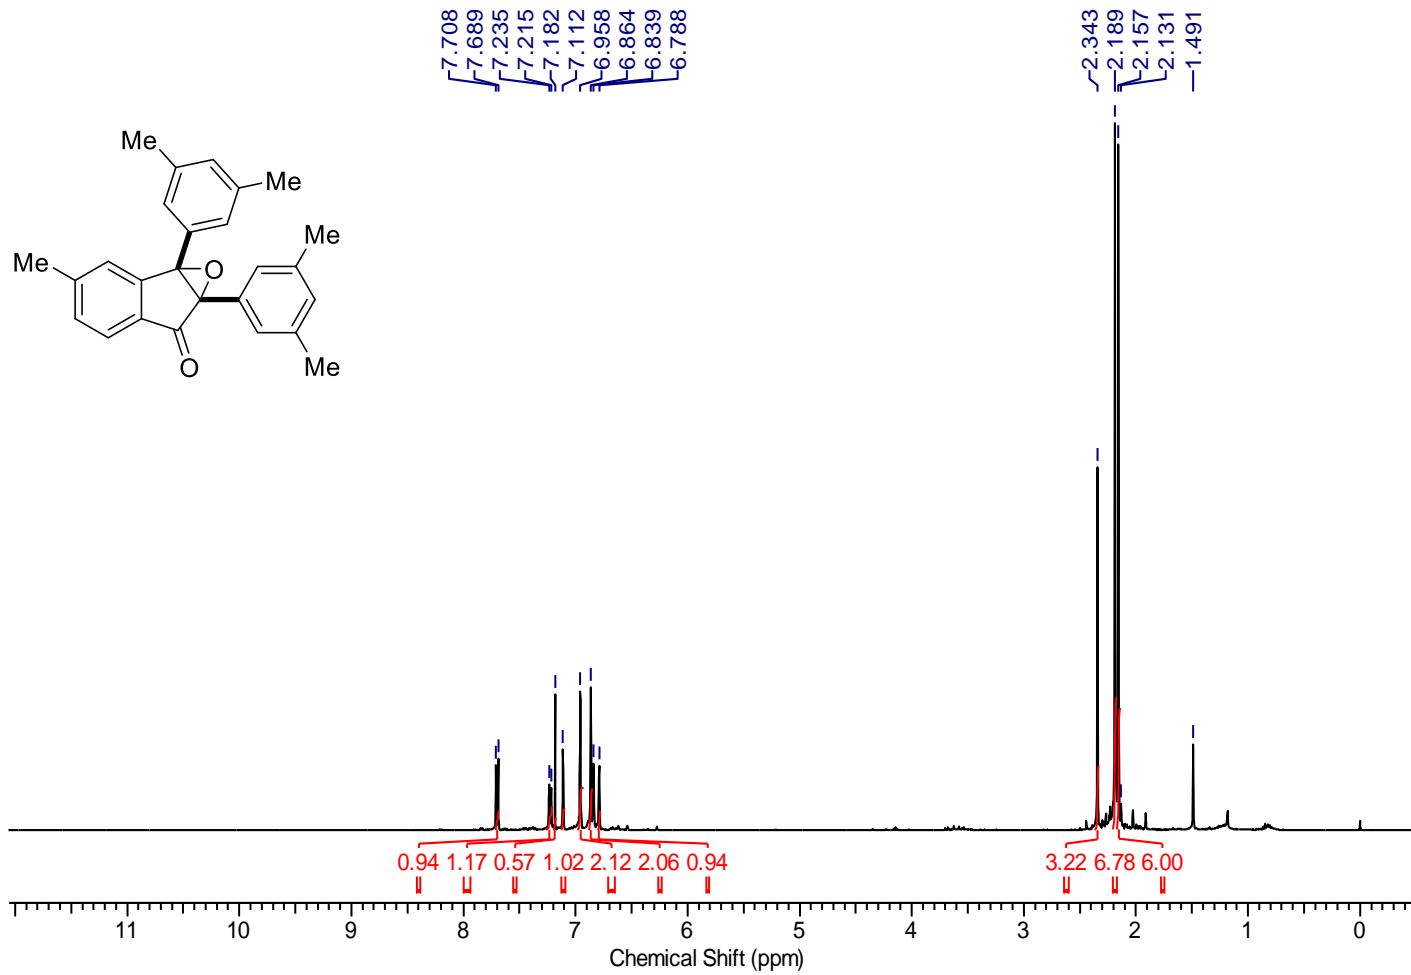

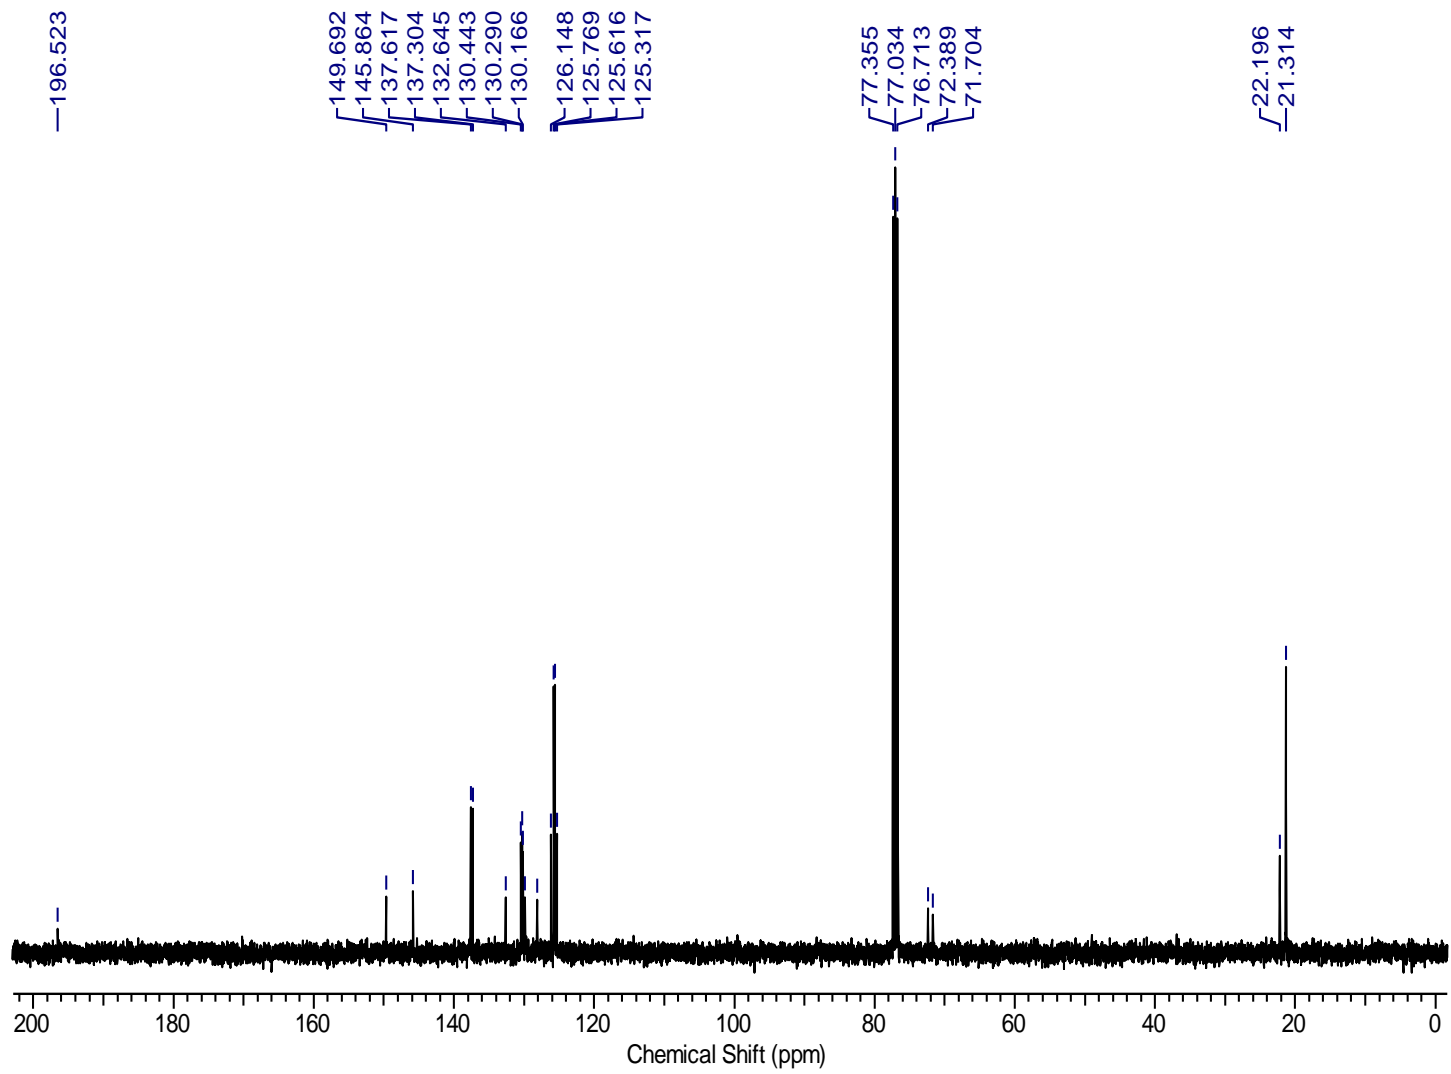

**$^1\text{H}$  (400 MHz) and  $^{13}\text{C}$  (100 MHz) NMR in  $\text{CDCl}_3$  of Compound 2h**

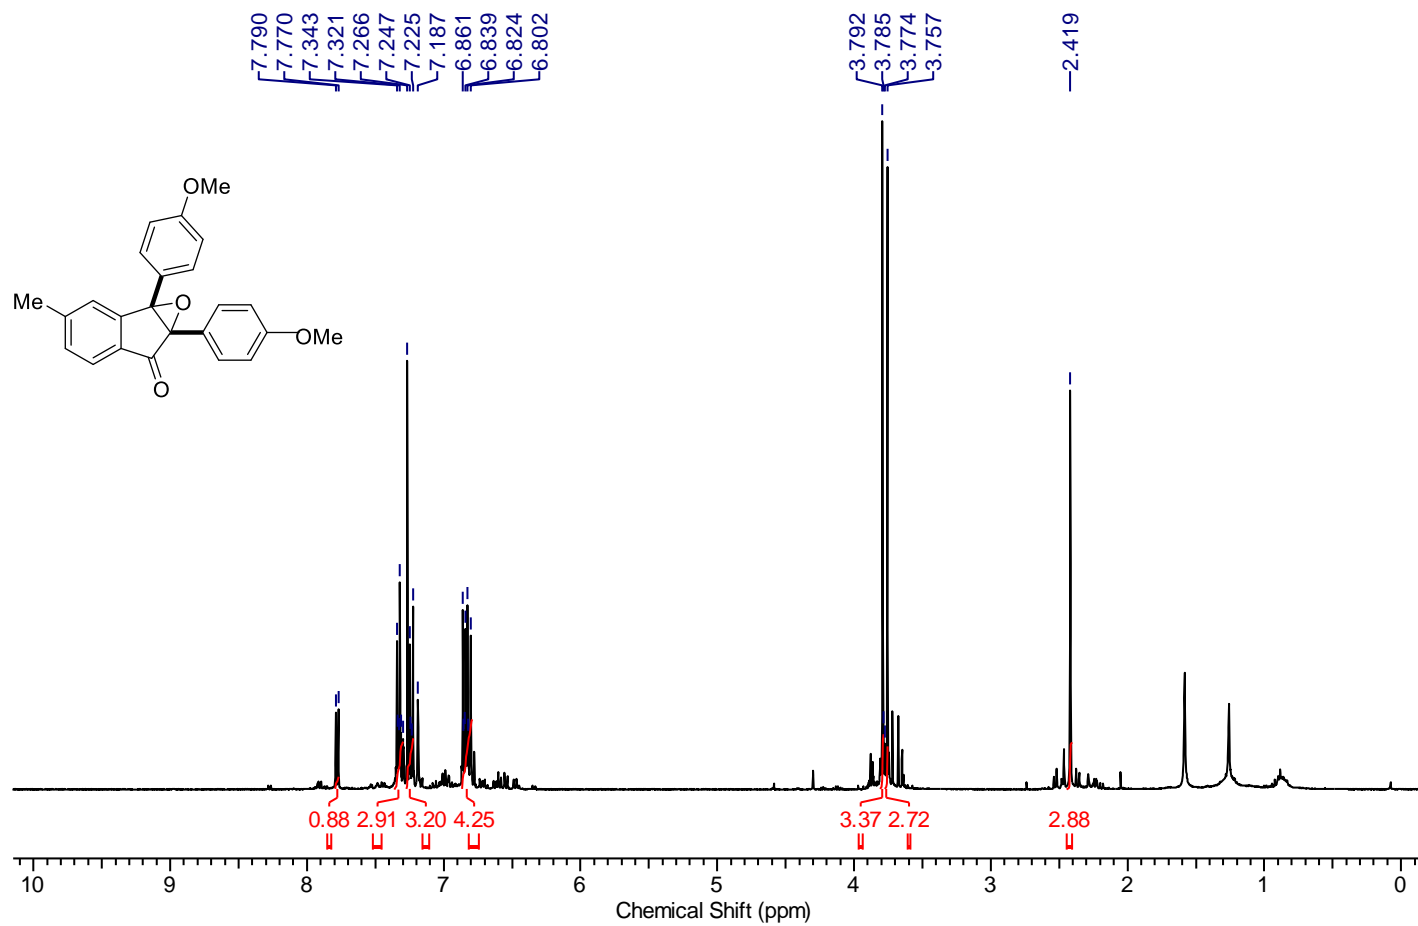



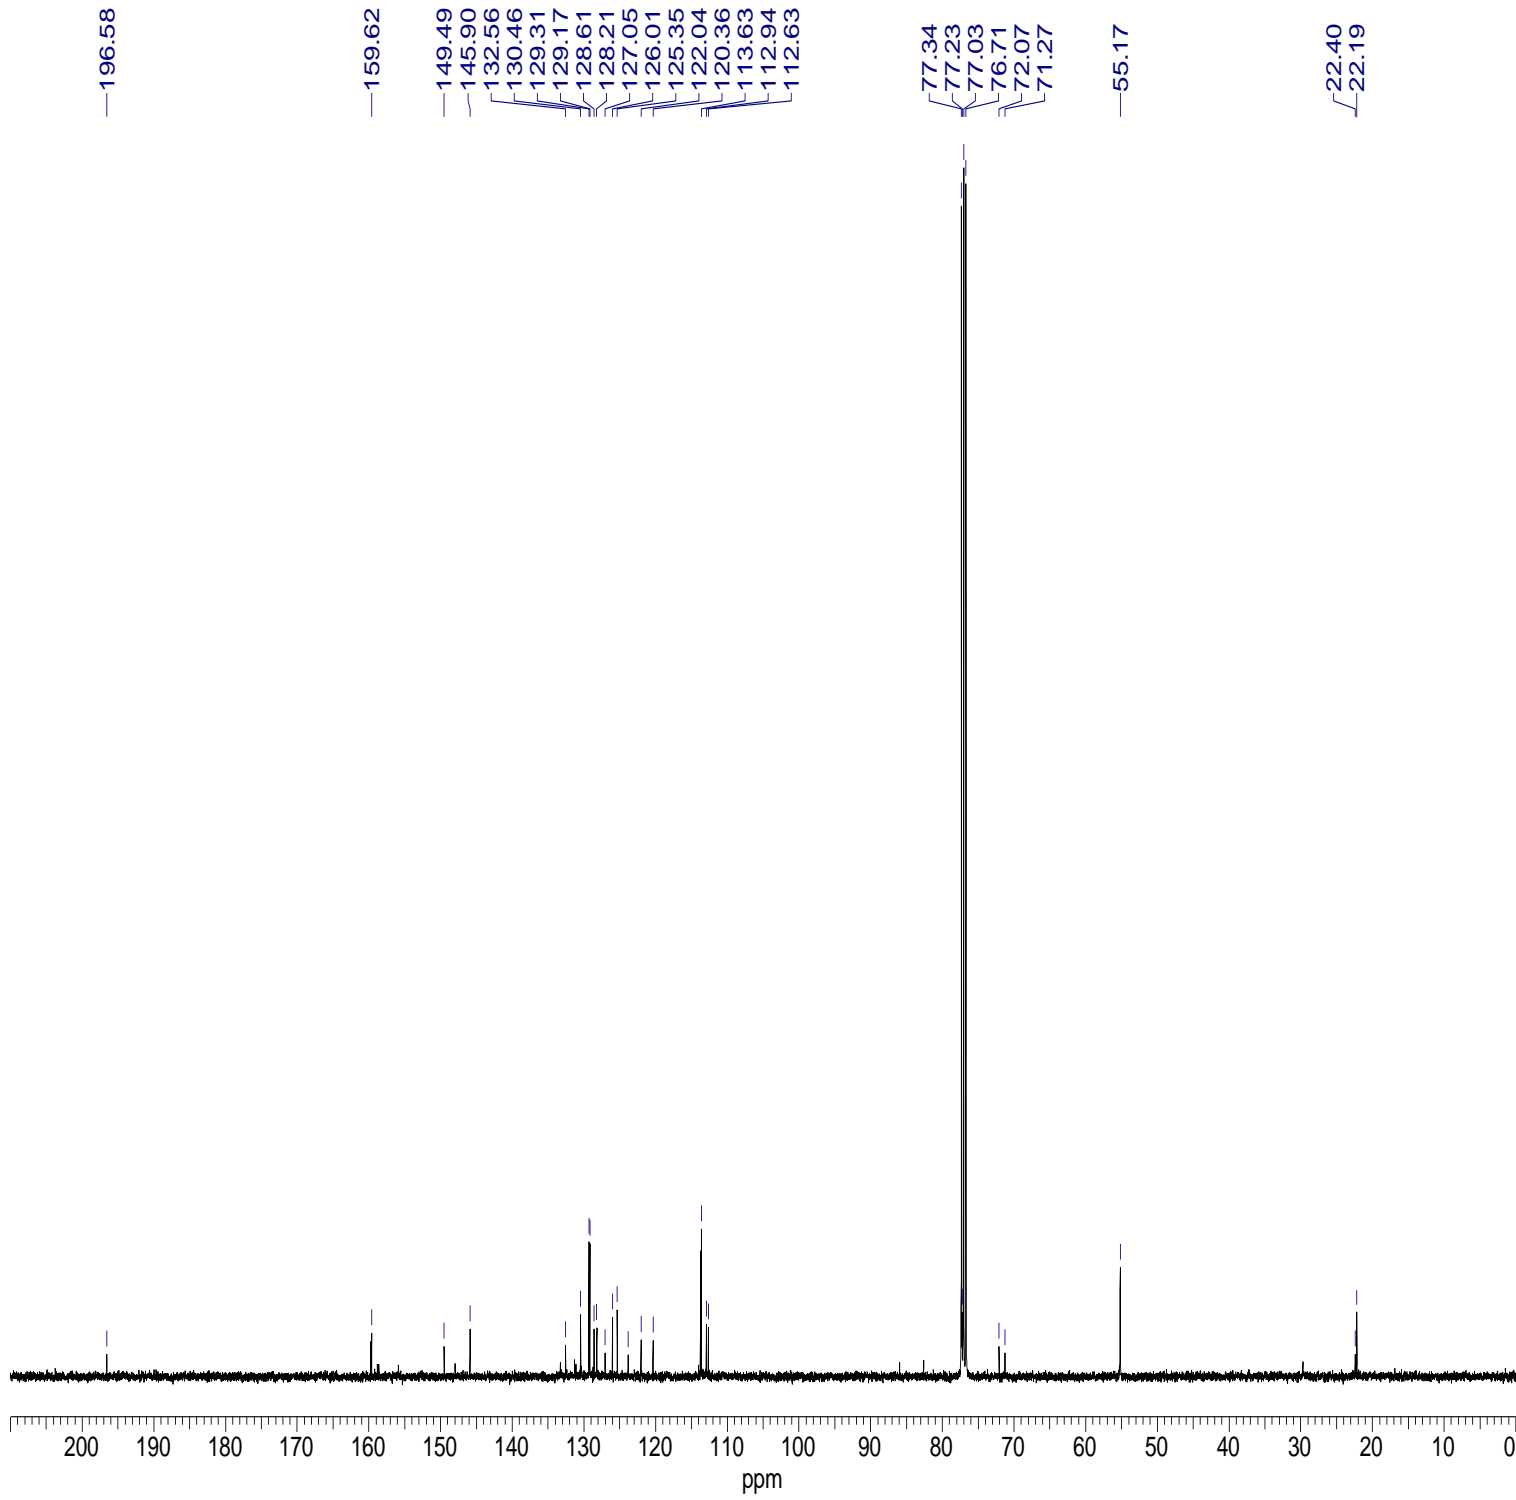

**$^1\text{H}$  (400 MHz) and  $^{13}\text{C}$  (100 MHz) NMR in  $\text{CDCl}_3$  of Compound 2i**

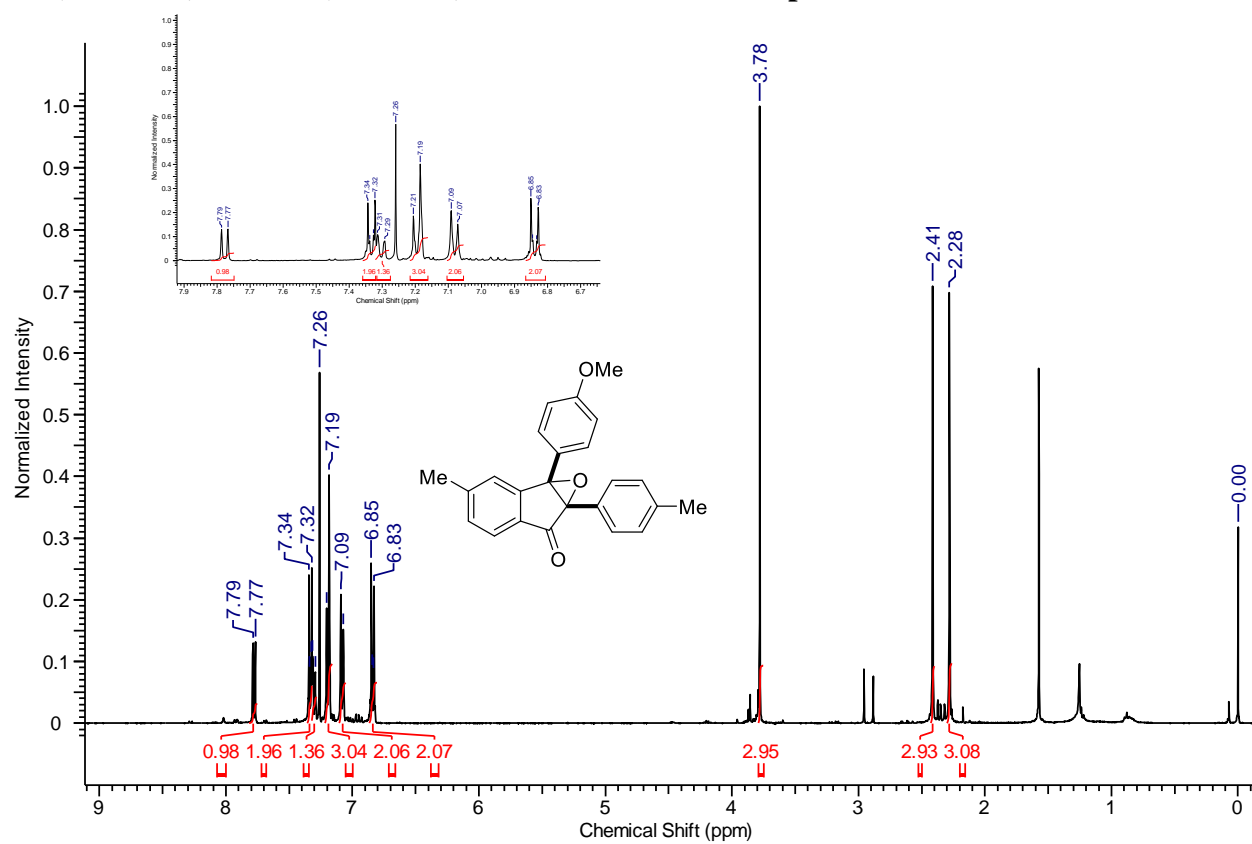

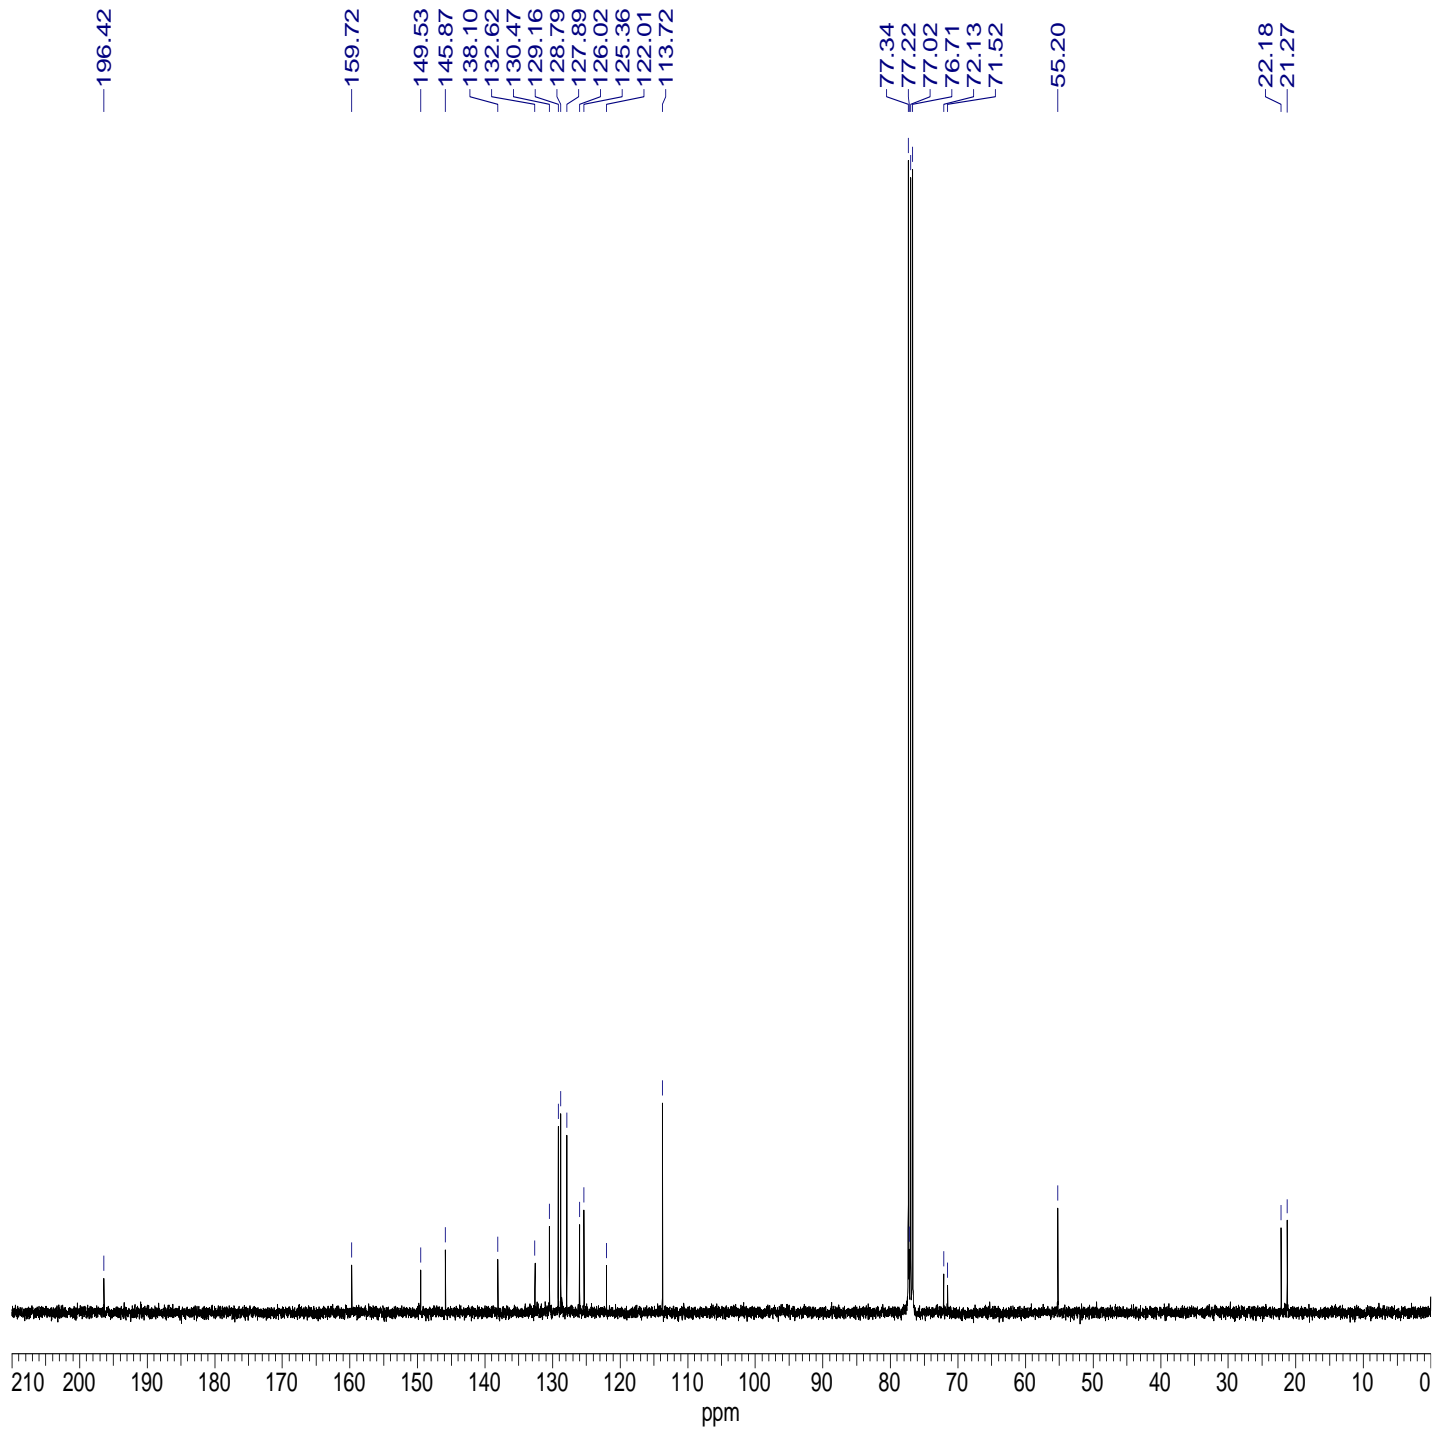

**$^1\text{H}$  (400 MHz) and  $^{13}\text{C}$  (100 MHz) NMR in  $\text{CDCl}_3$  of Compound 3aa**

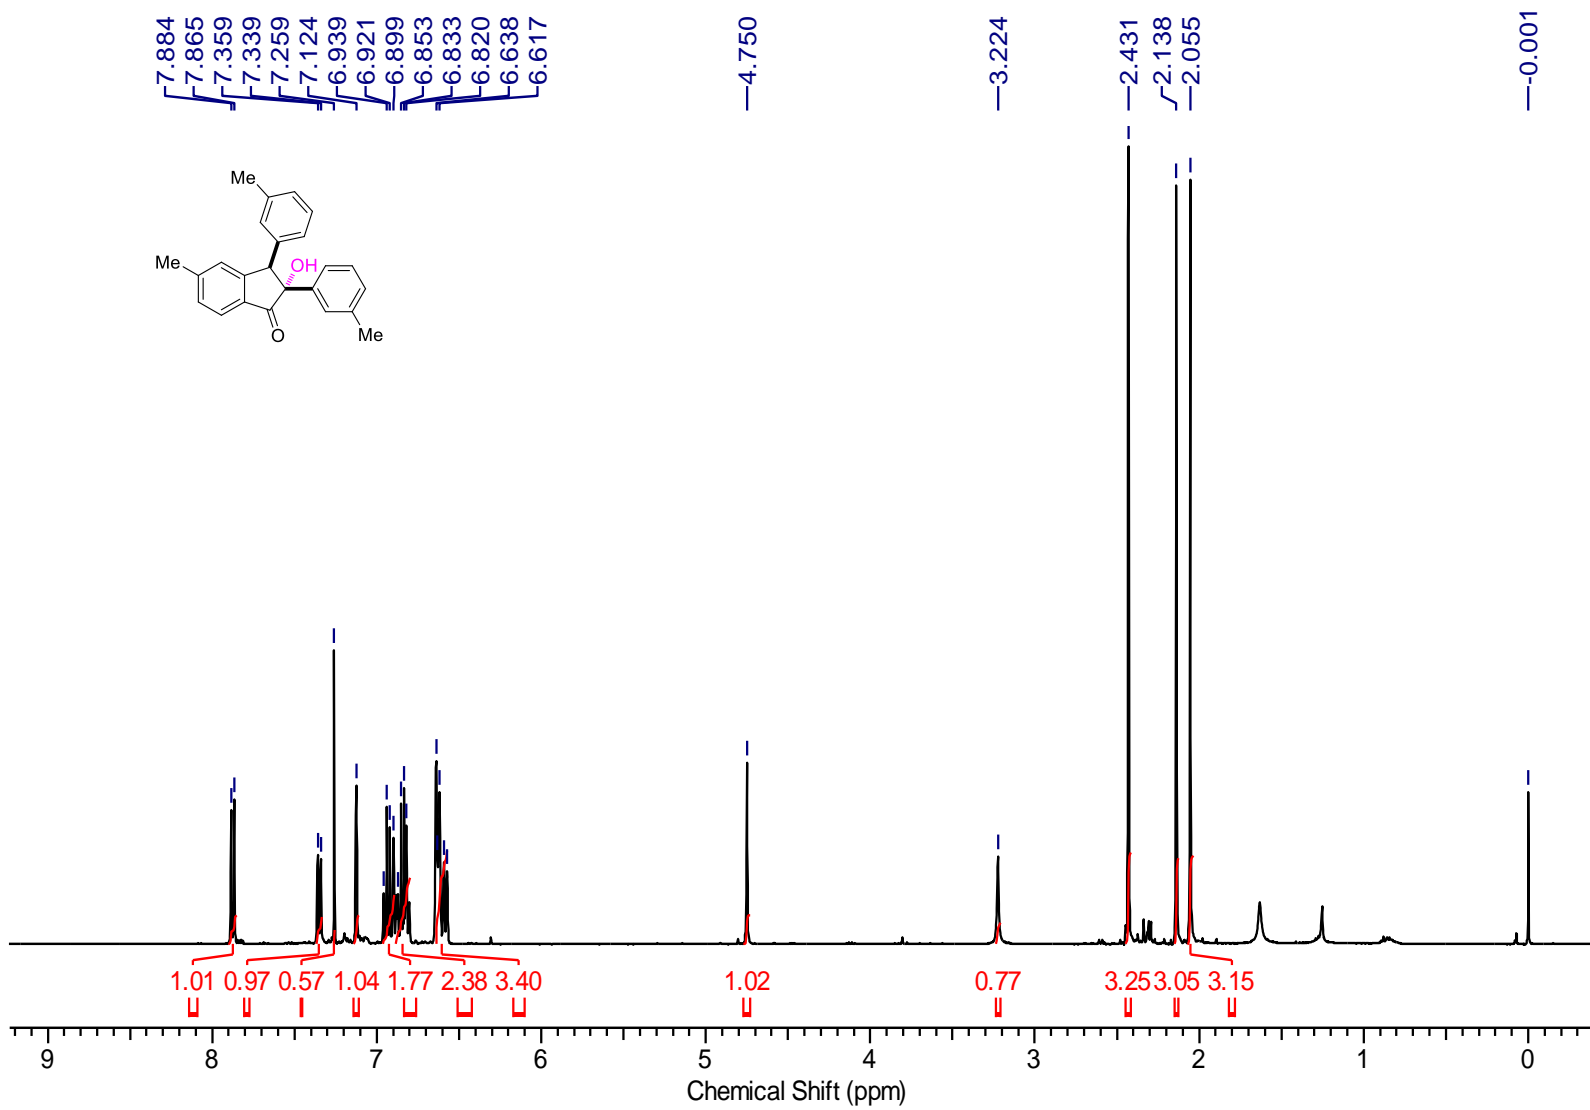

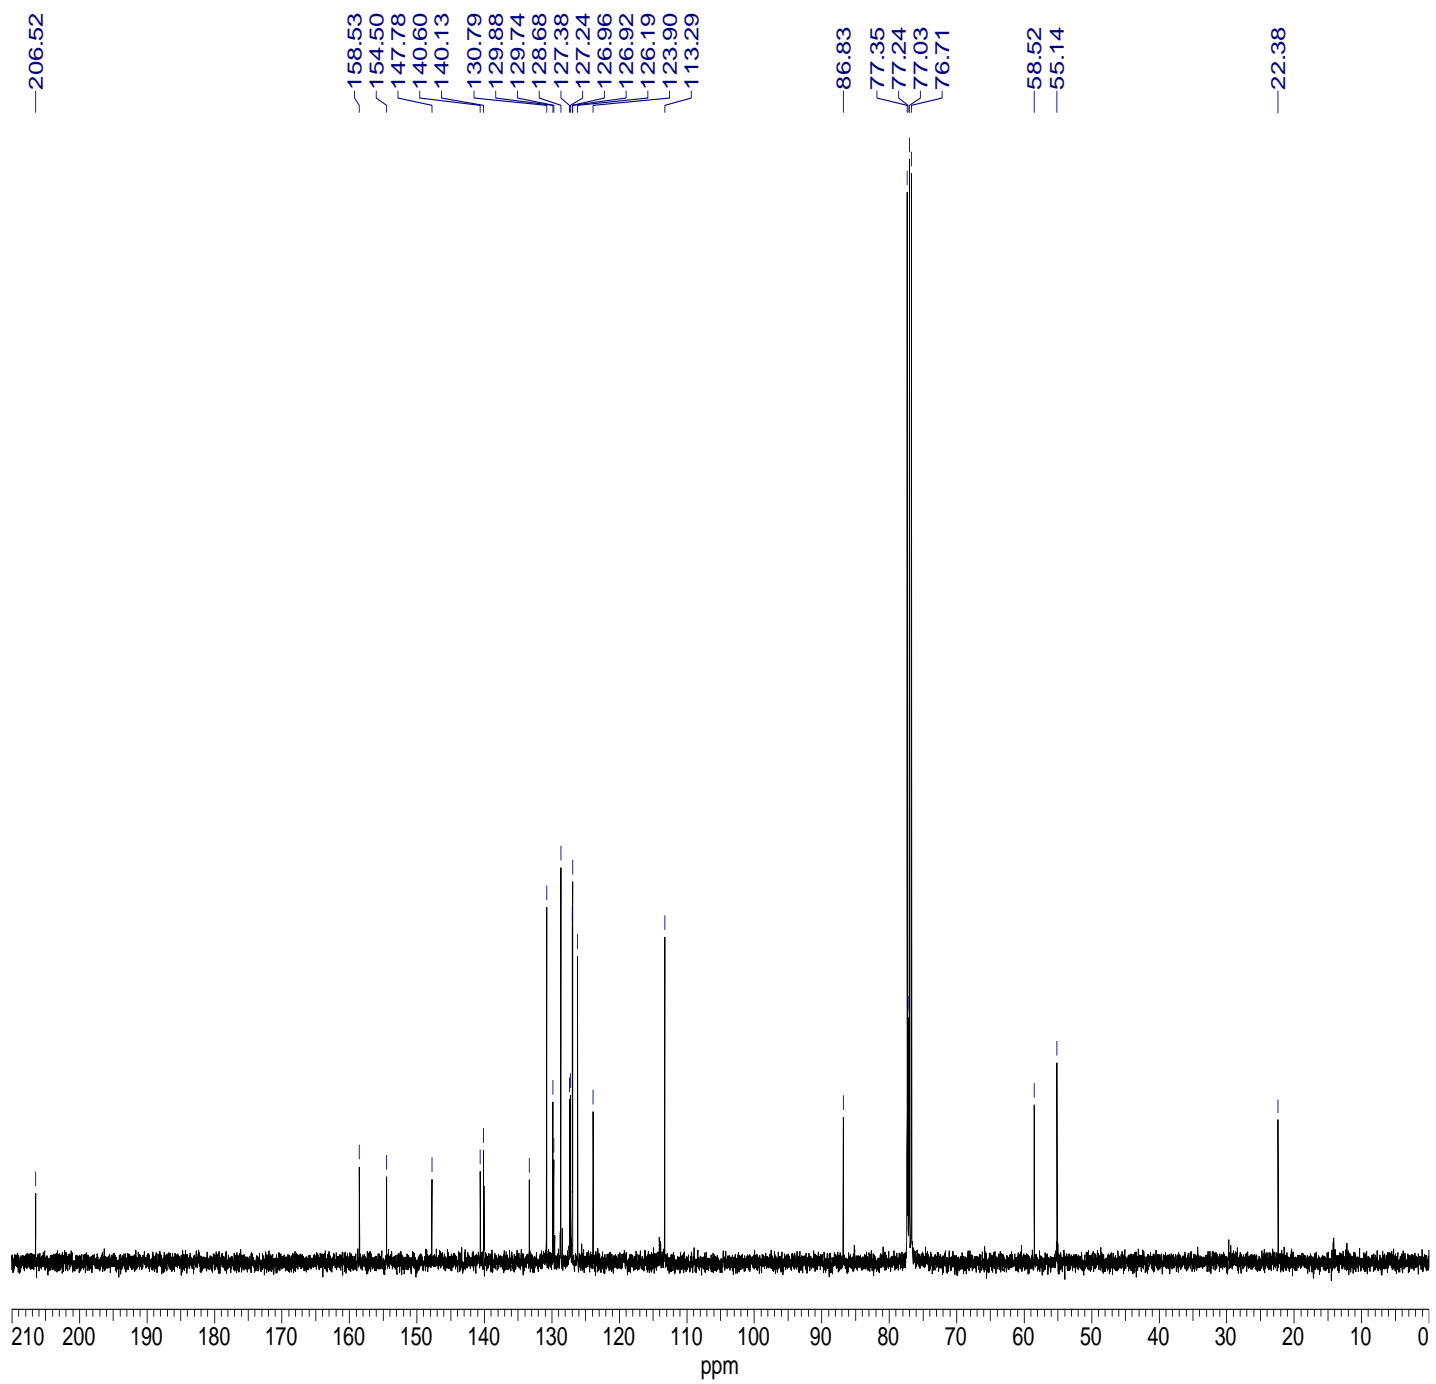

**$^1\text{H}$  (400 MHz) and  $^{13}\text{C}$  (100 MHz) NMR in  $\text{CDCl}_3$  of Compound 3ab**

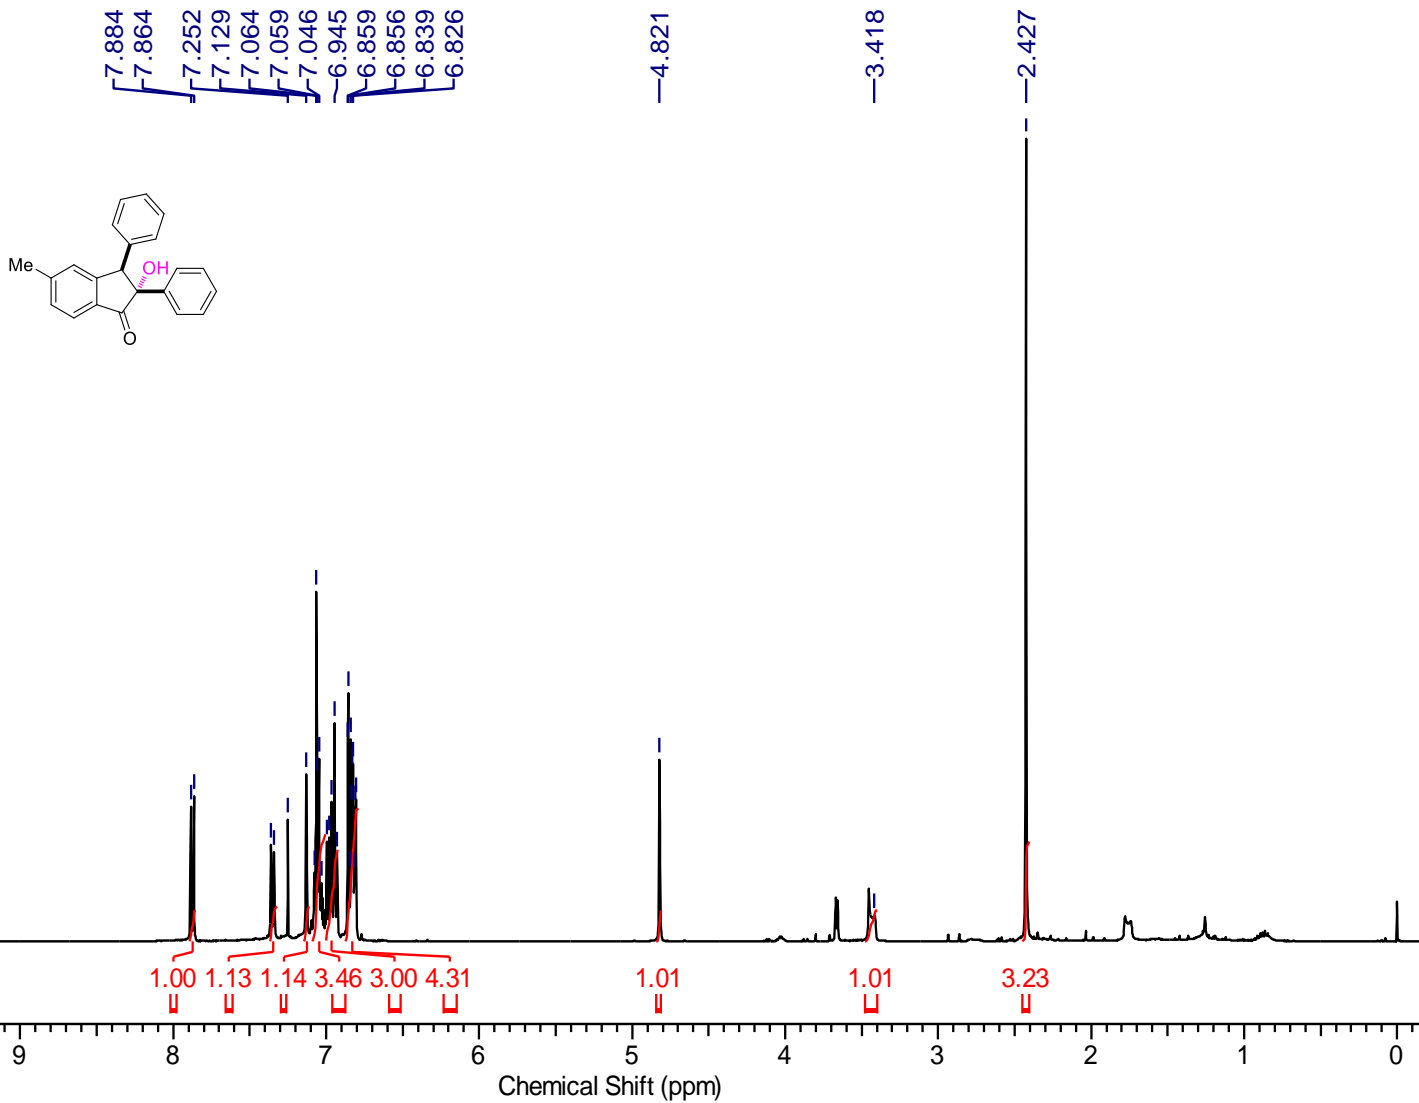

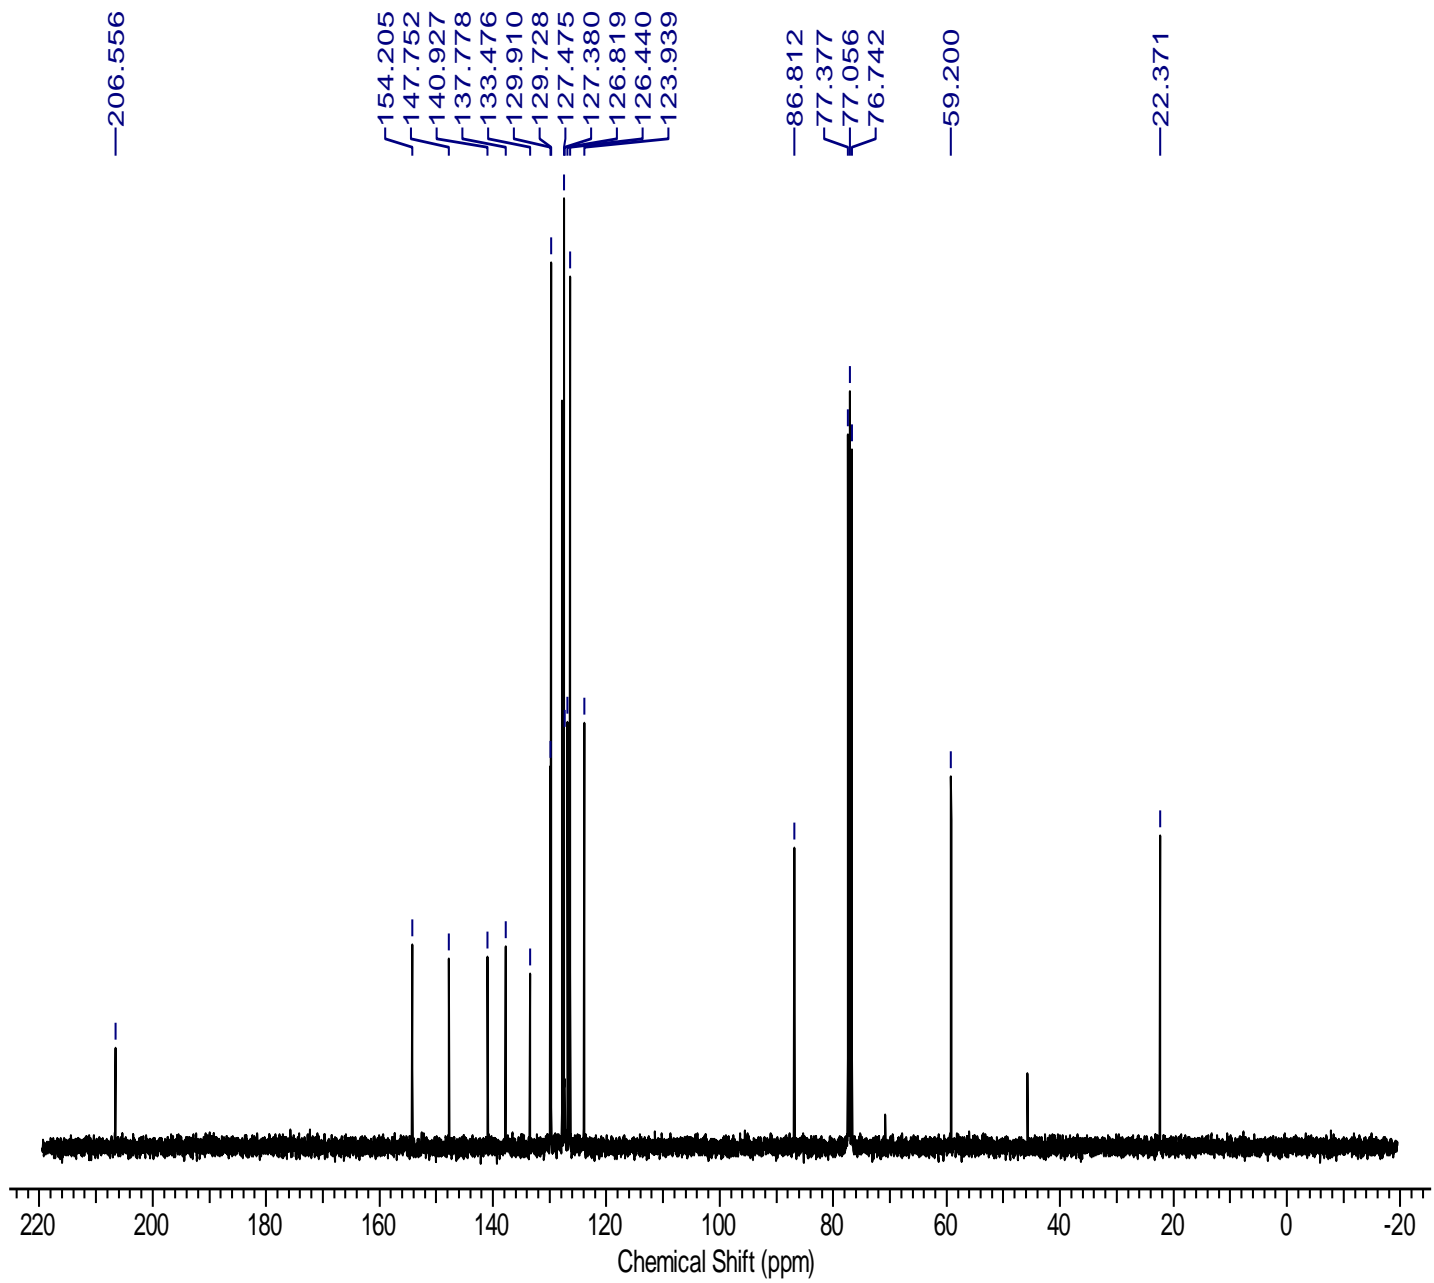

**<sup>1</sup>H (400 MHz) and <sup>13</sup>C (100 MHz) NMR in CDCl<sub>3</sub> of Compound 3ac**

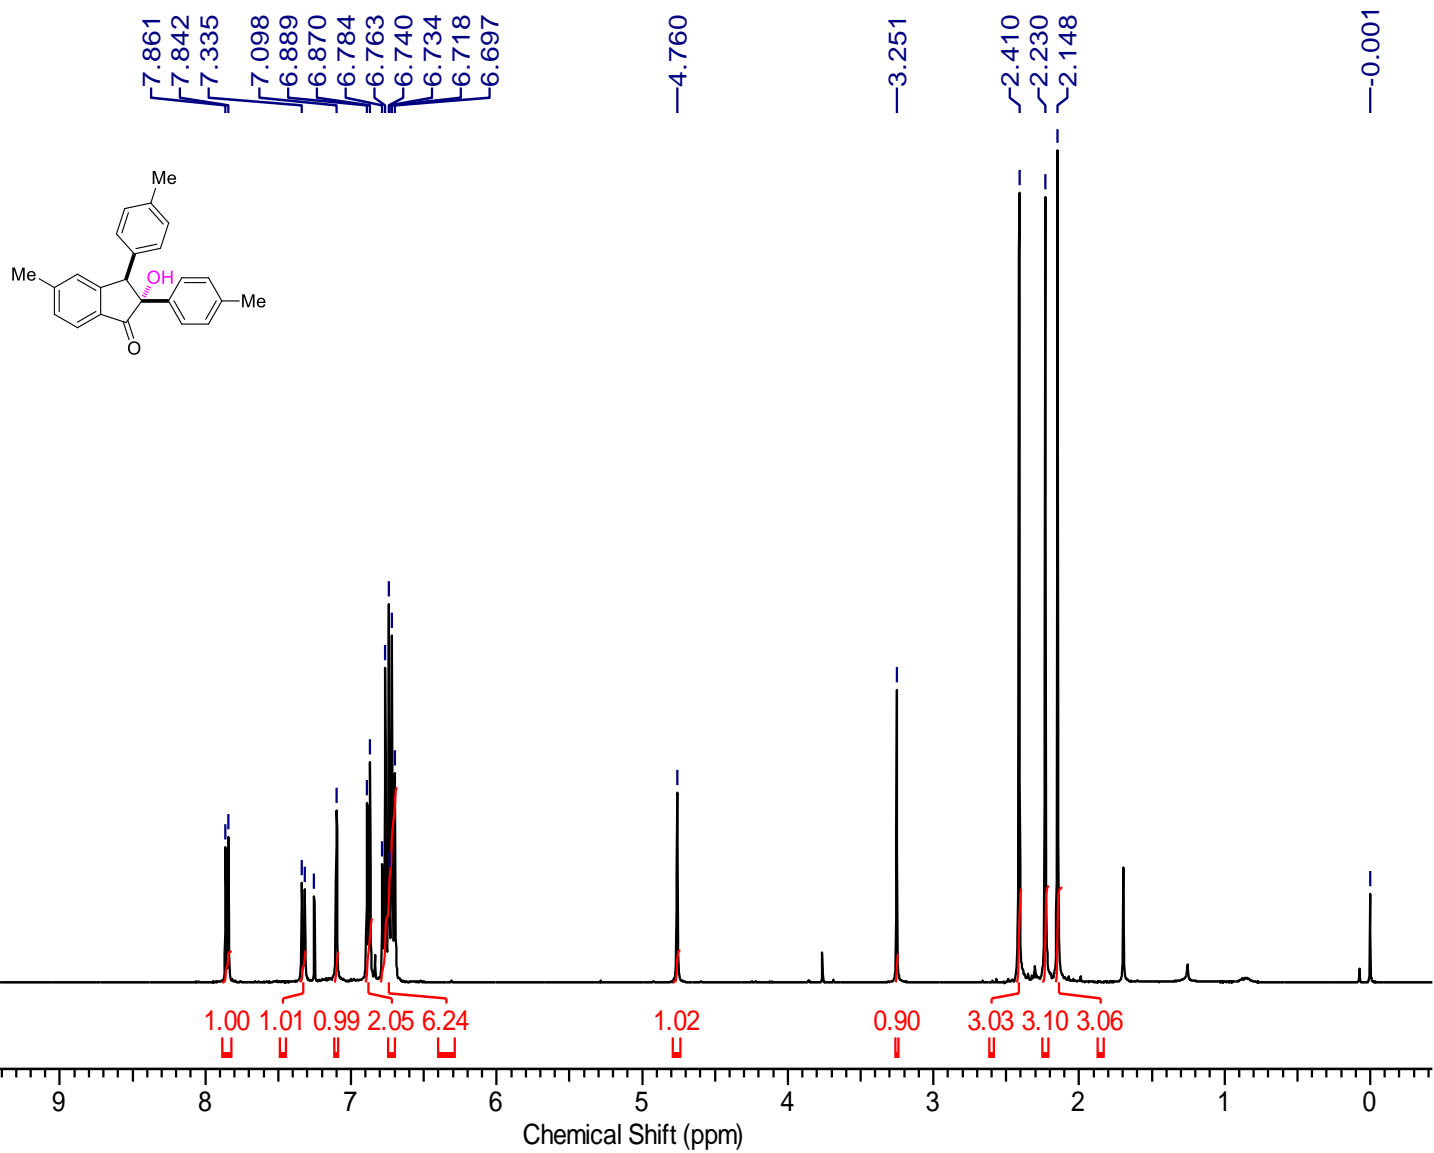



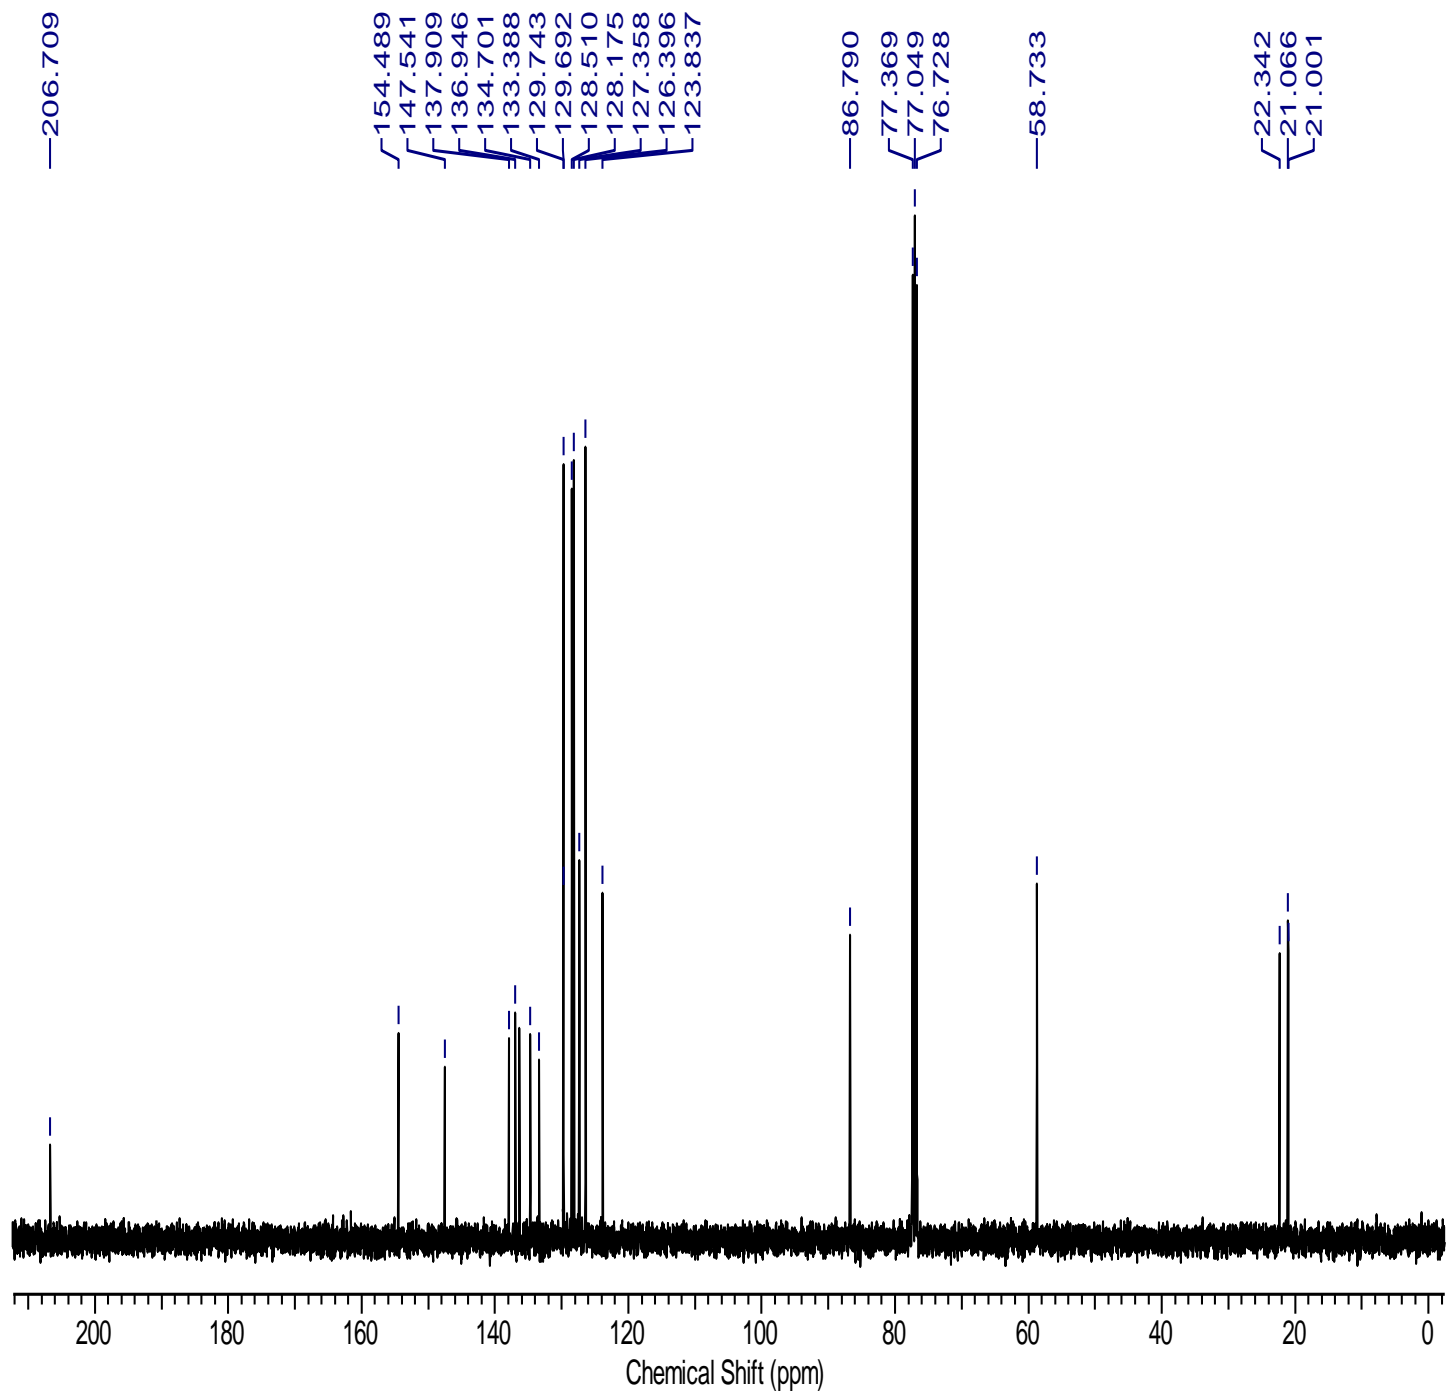

**<sup>1</sup>H (400 MHz) and <sup>13</sup>C (100 MHz) NMR in CDCl<sub>3</sub> of Compound 3ad**

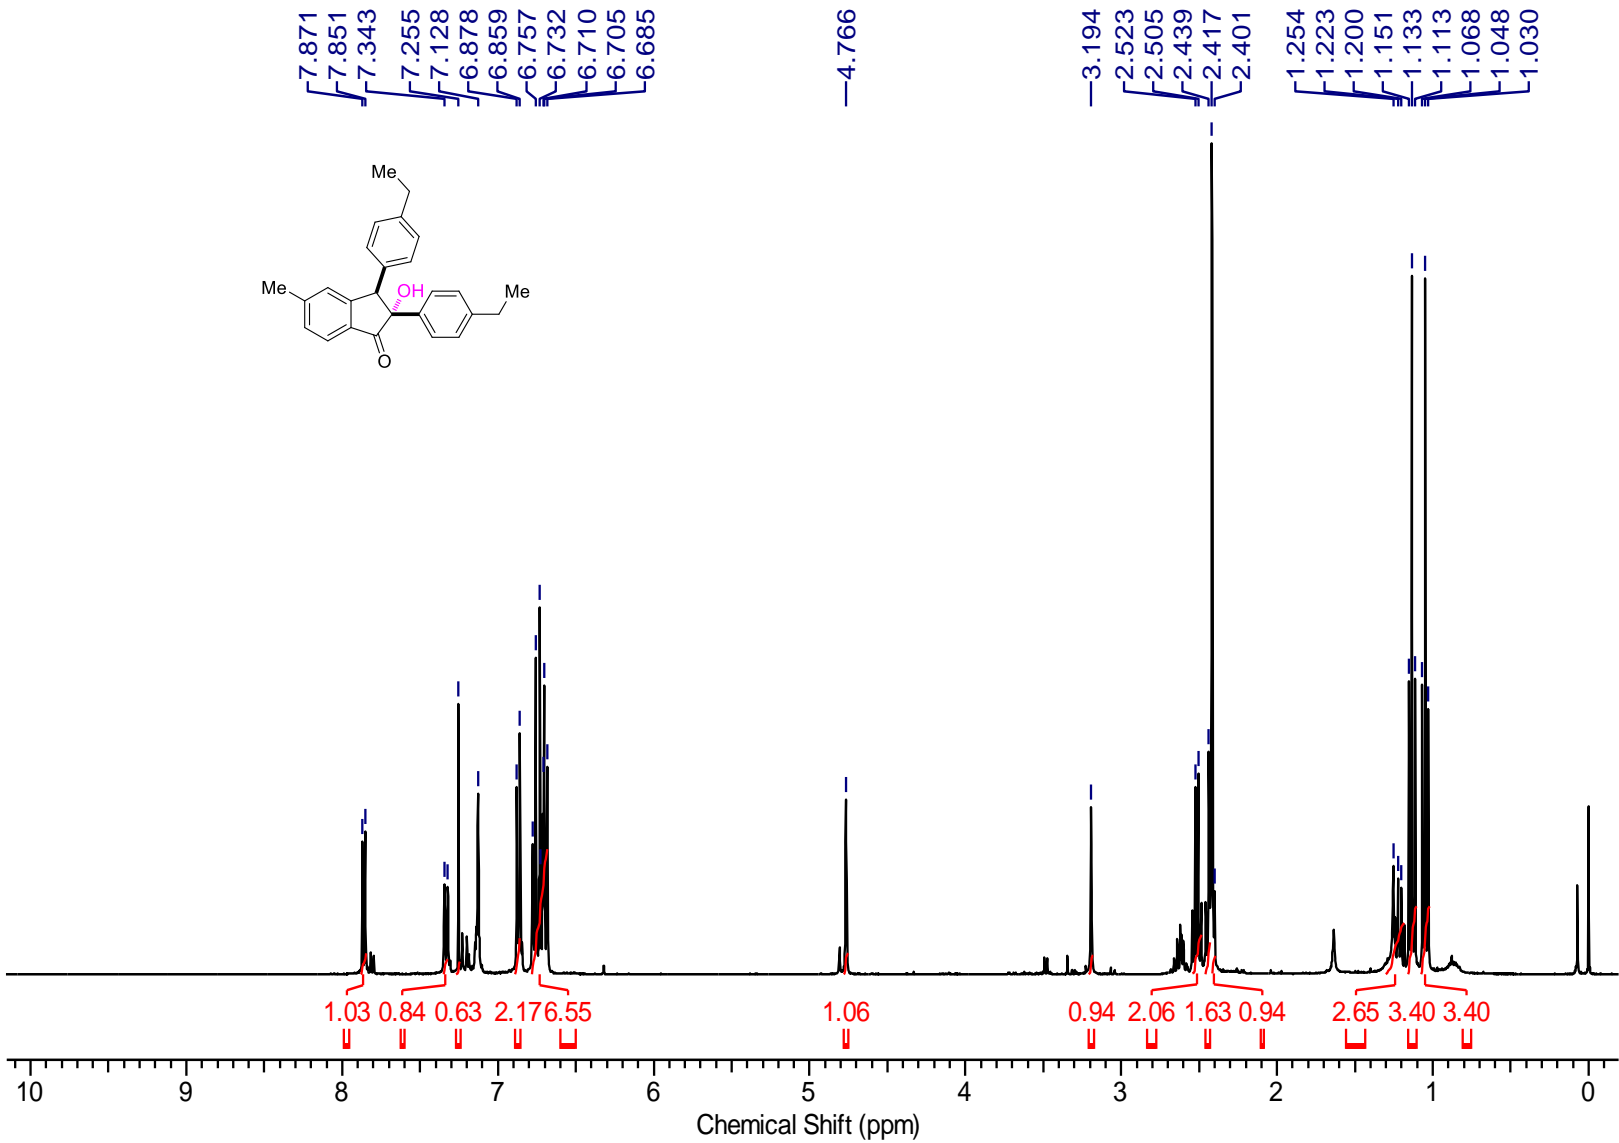

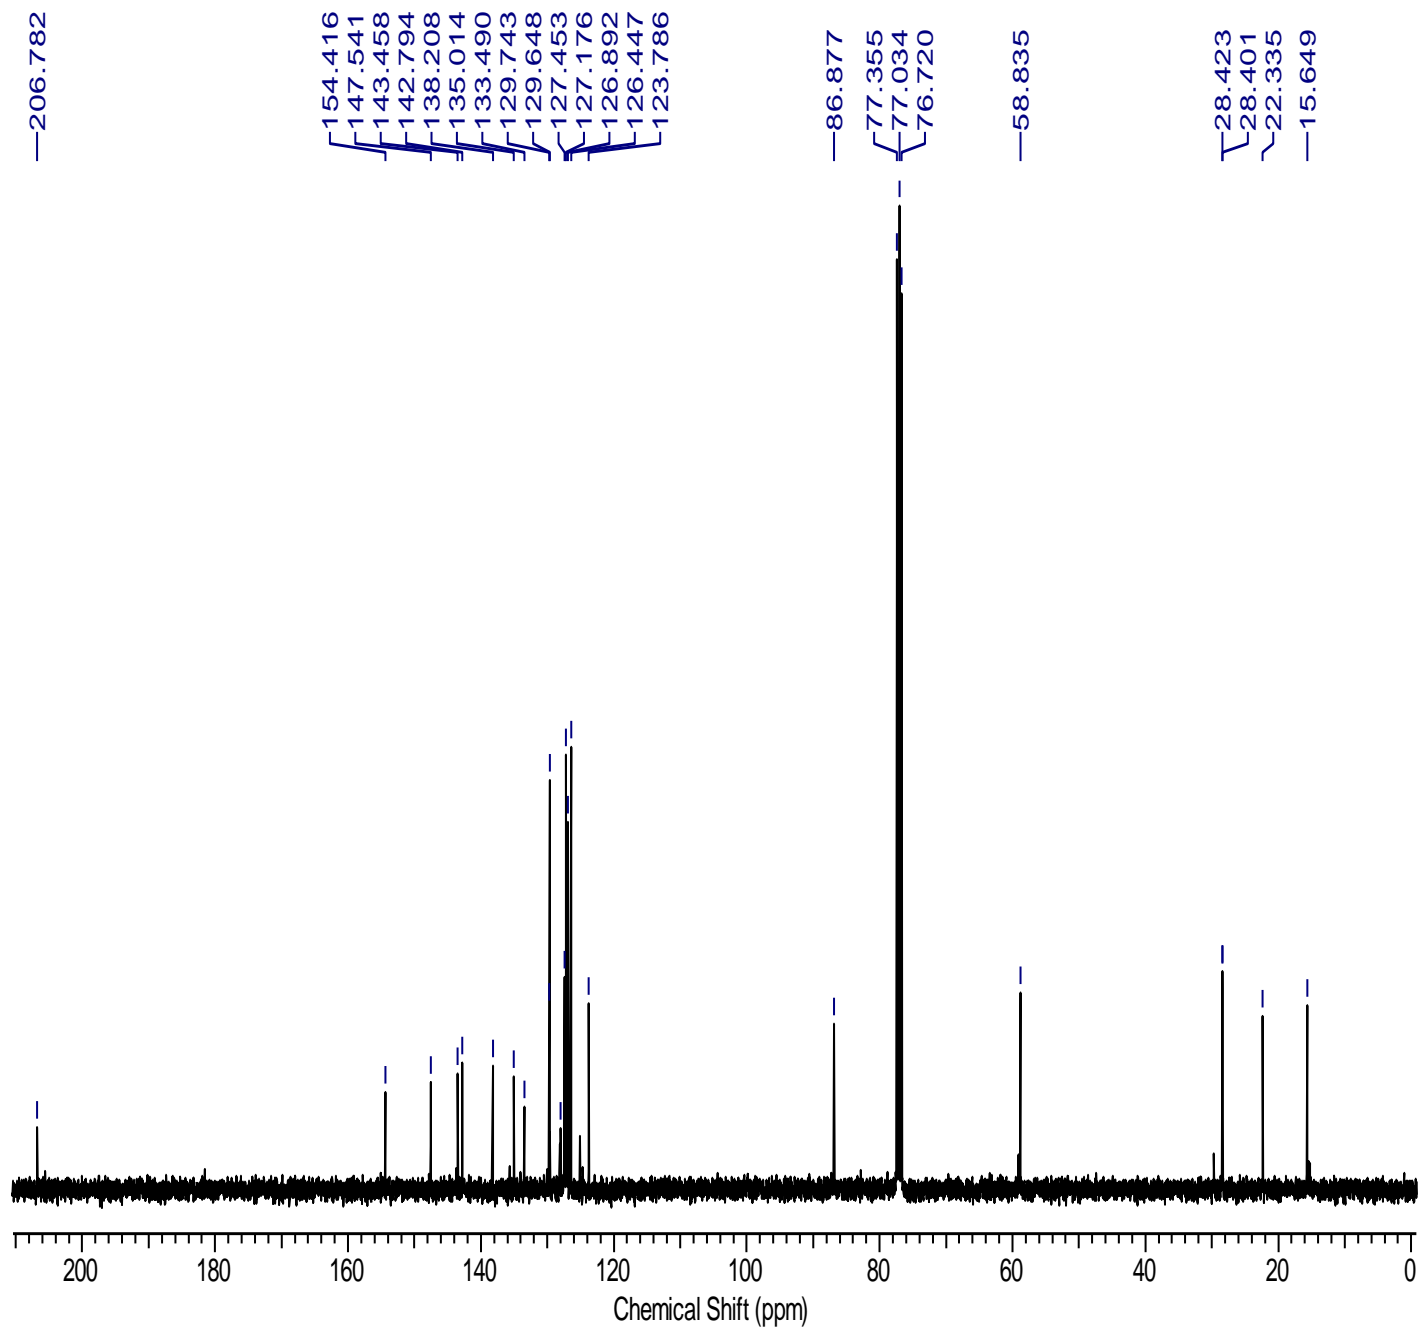

<sup>1</sup>H (400 MHz) and <sup>13</sup>C (100 MHz) NMR in CDCl<sub>3</sub> of Compound 3ae

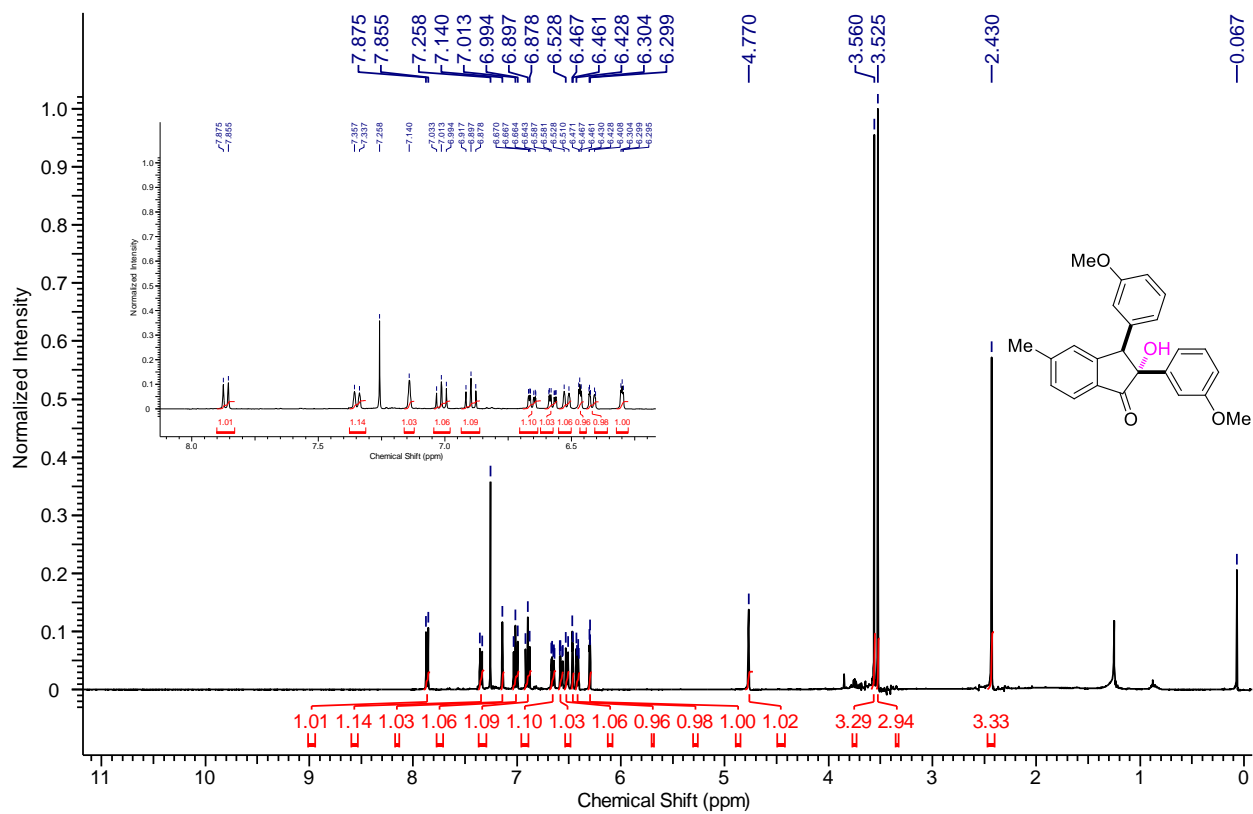

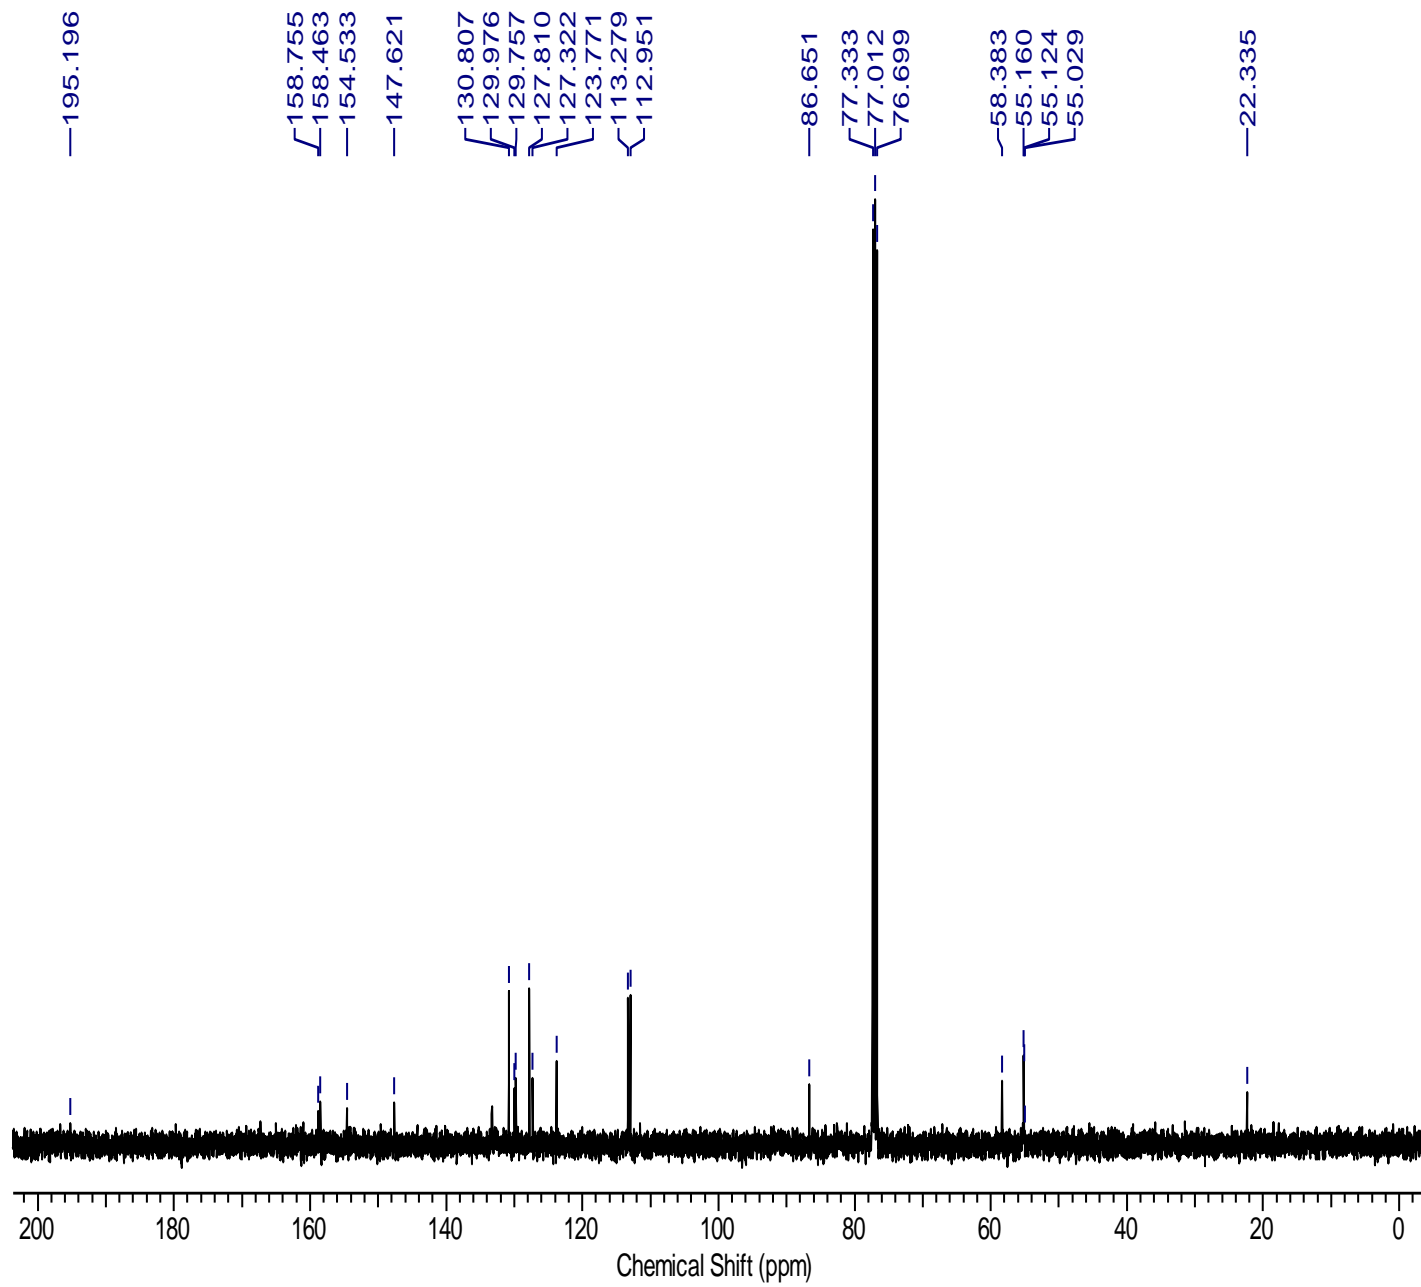

**<sup>1</sup>H (400 MHz) and <sup>13</sup>C (100 MHz) NMR in CDCl<sub>3</sub> of Compound 3af**

7.872  
7.852  
7.341  
7.322  
7.248  
7.120  
6.703  
6.623  
6.427  
6.383

4.671

3.257

2.424  
2.092  
2.035  
2.020

0.001

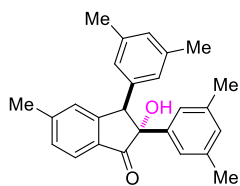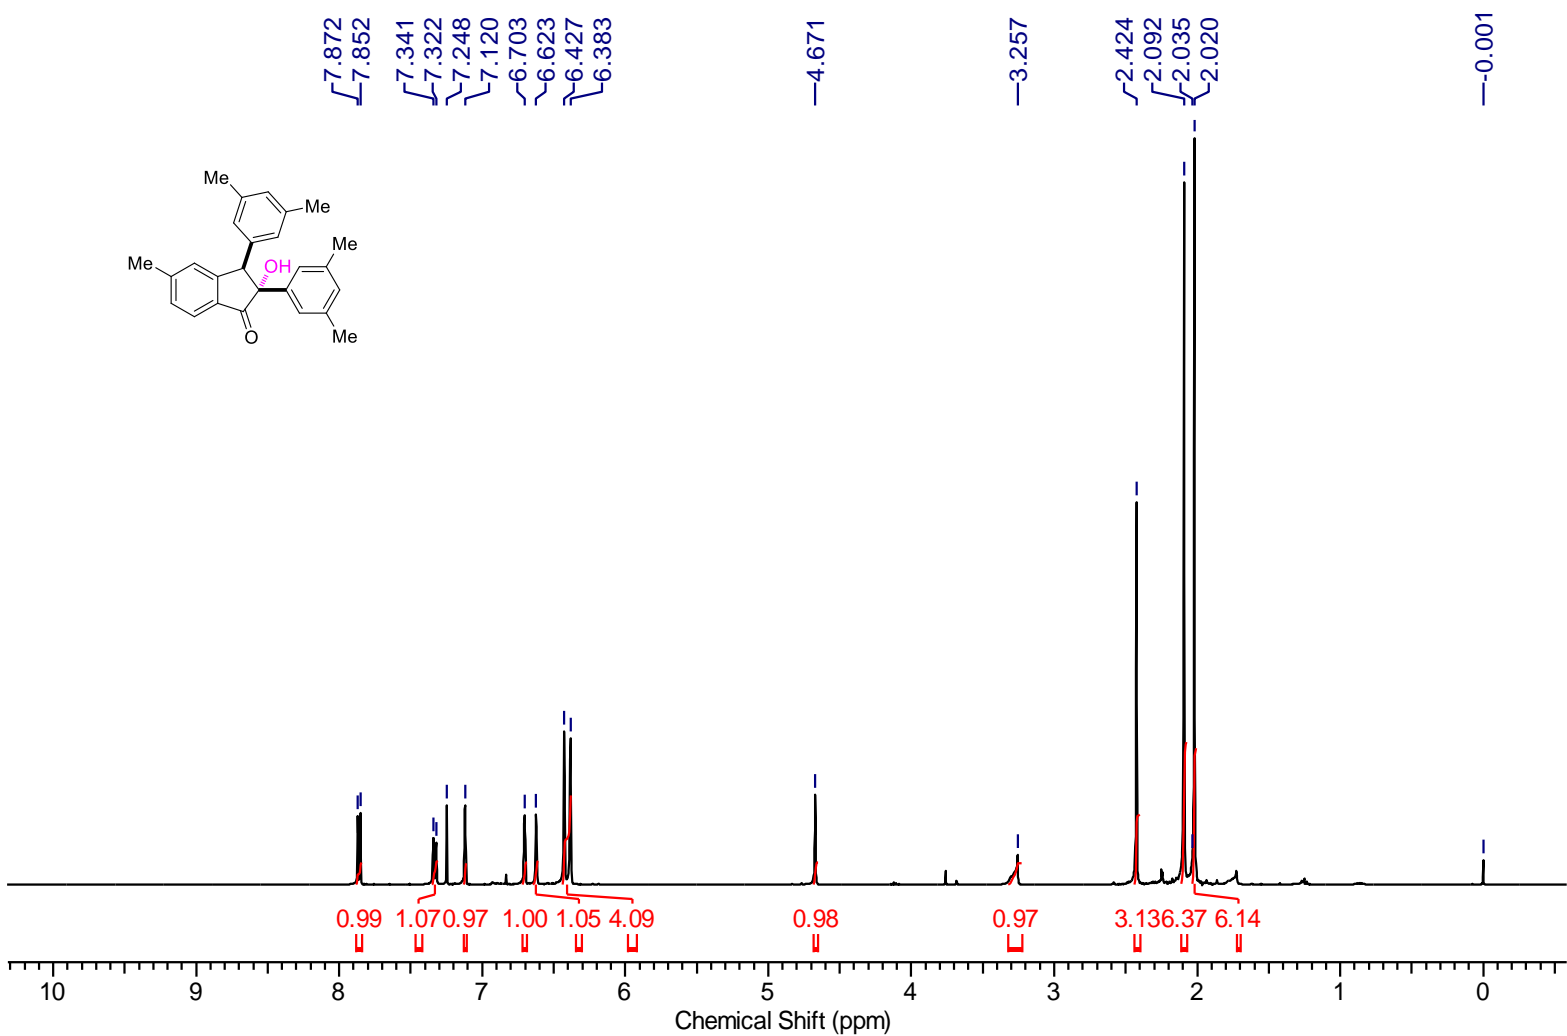

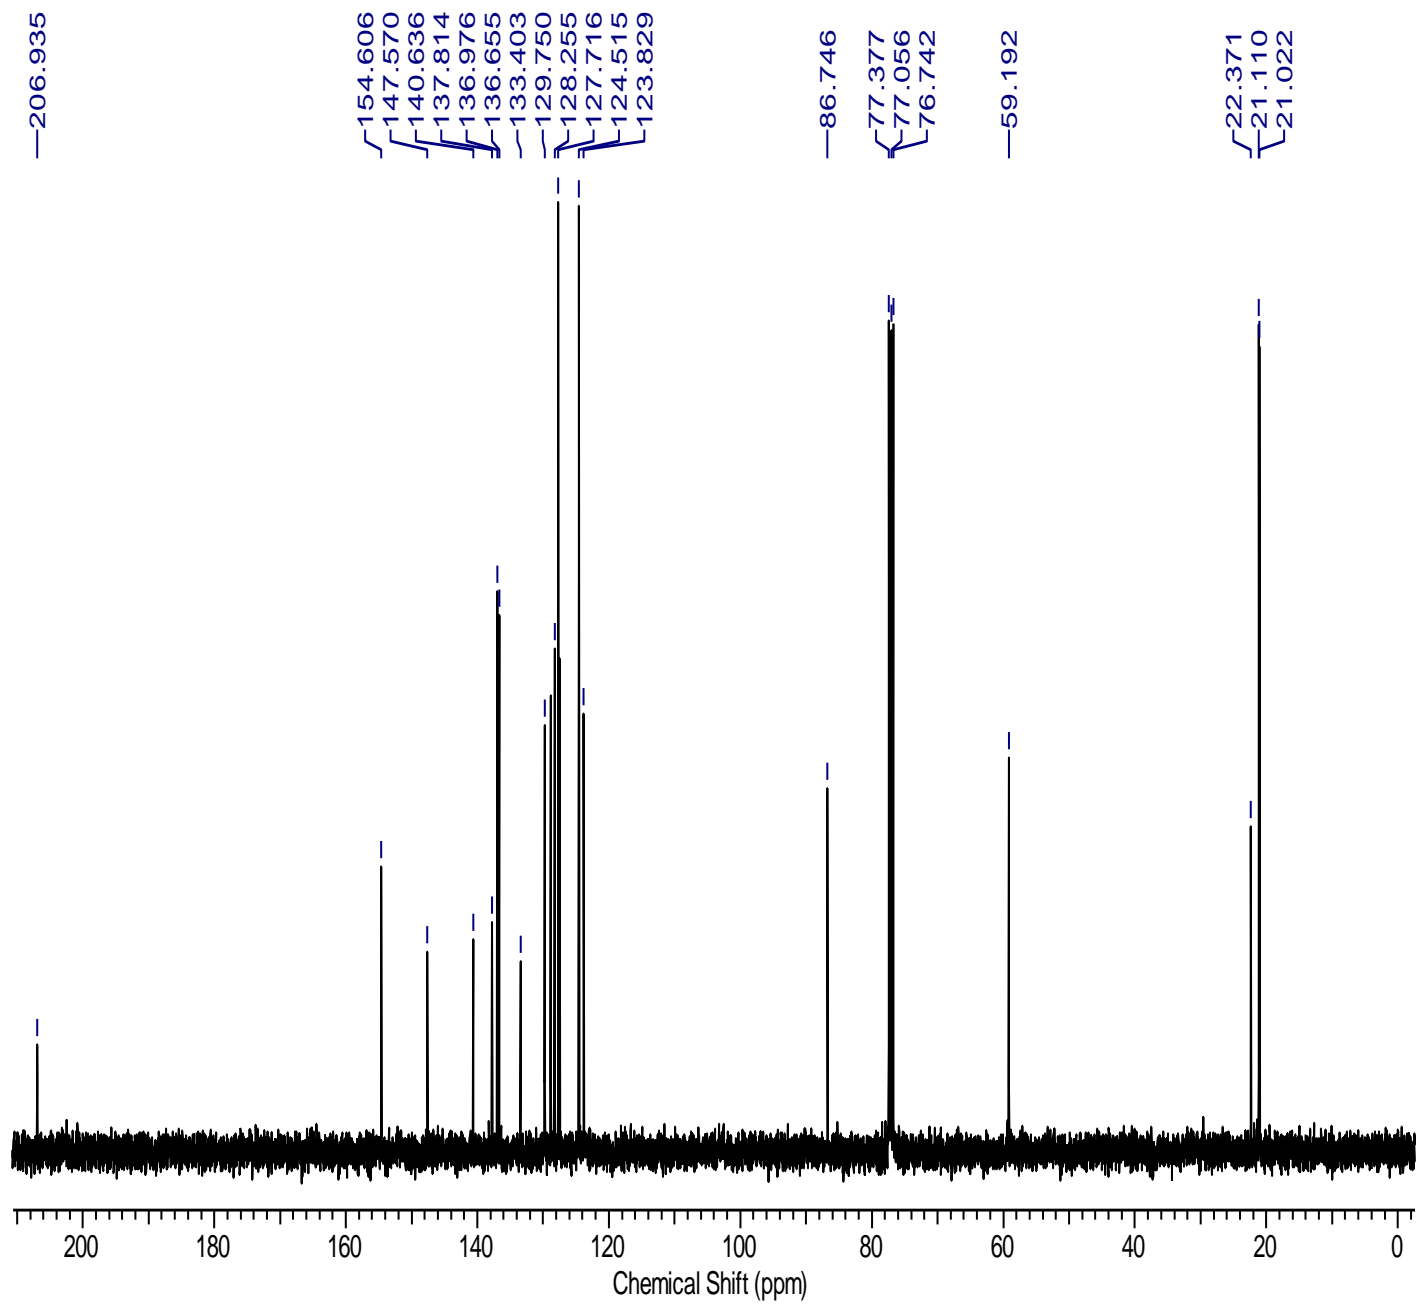

**<sup>1</sup>H (400 MHz) and <sup>13</sup>C (100 MHz) NMR in CDCl<sub>3</sub> of Compound 3ag**

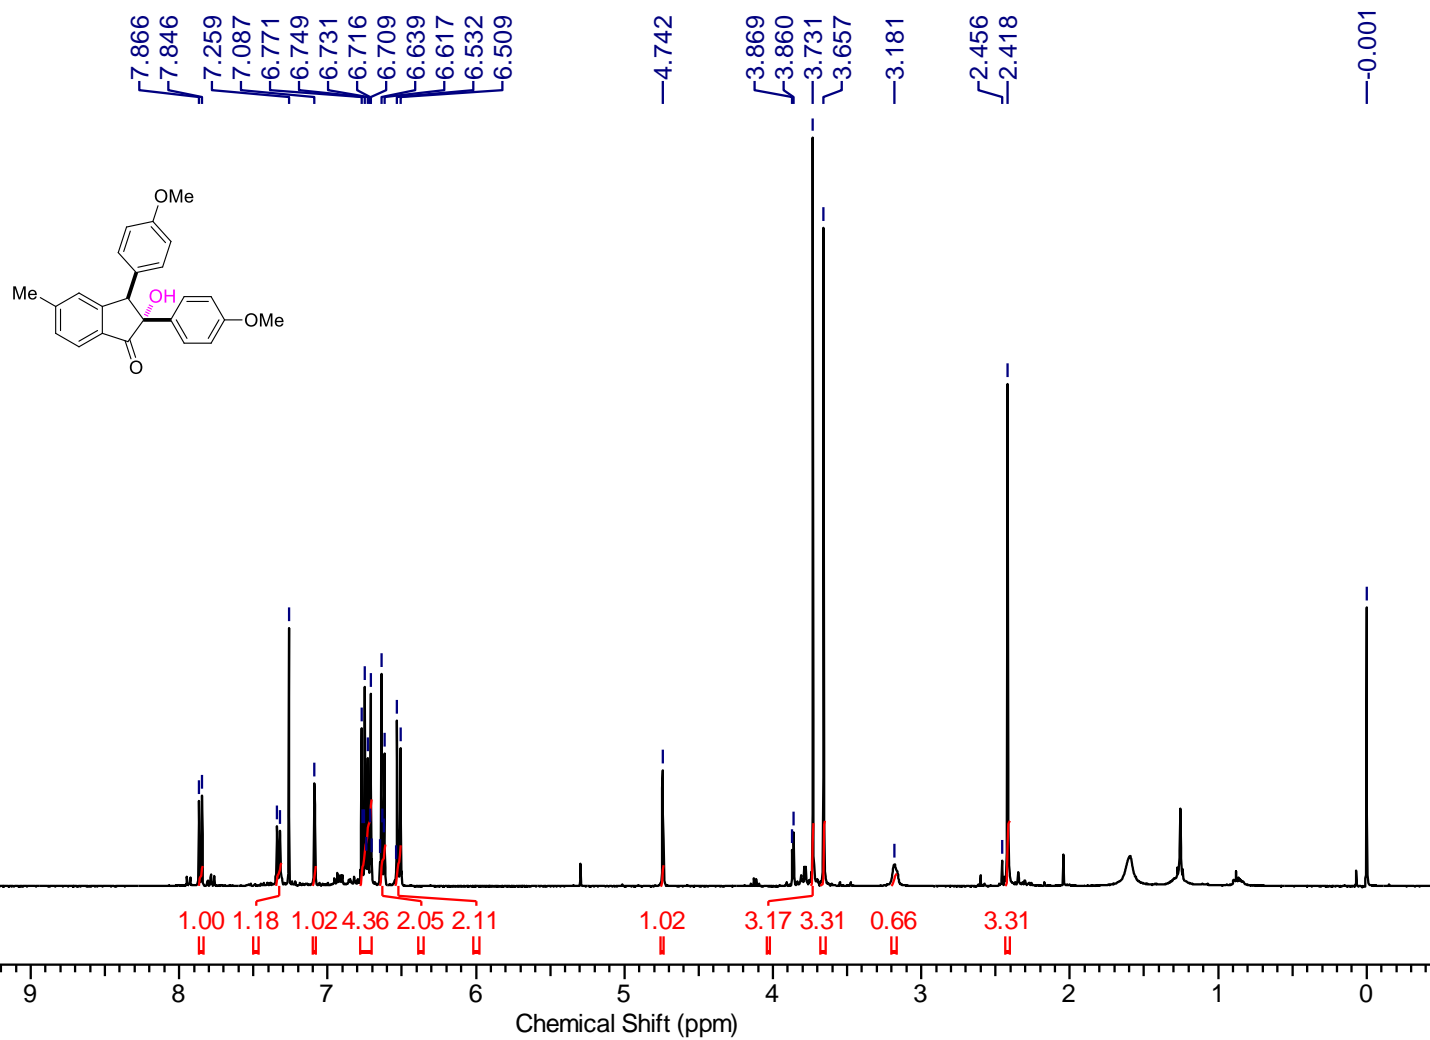



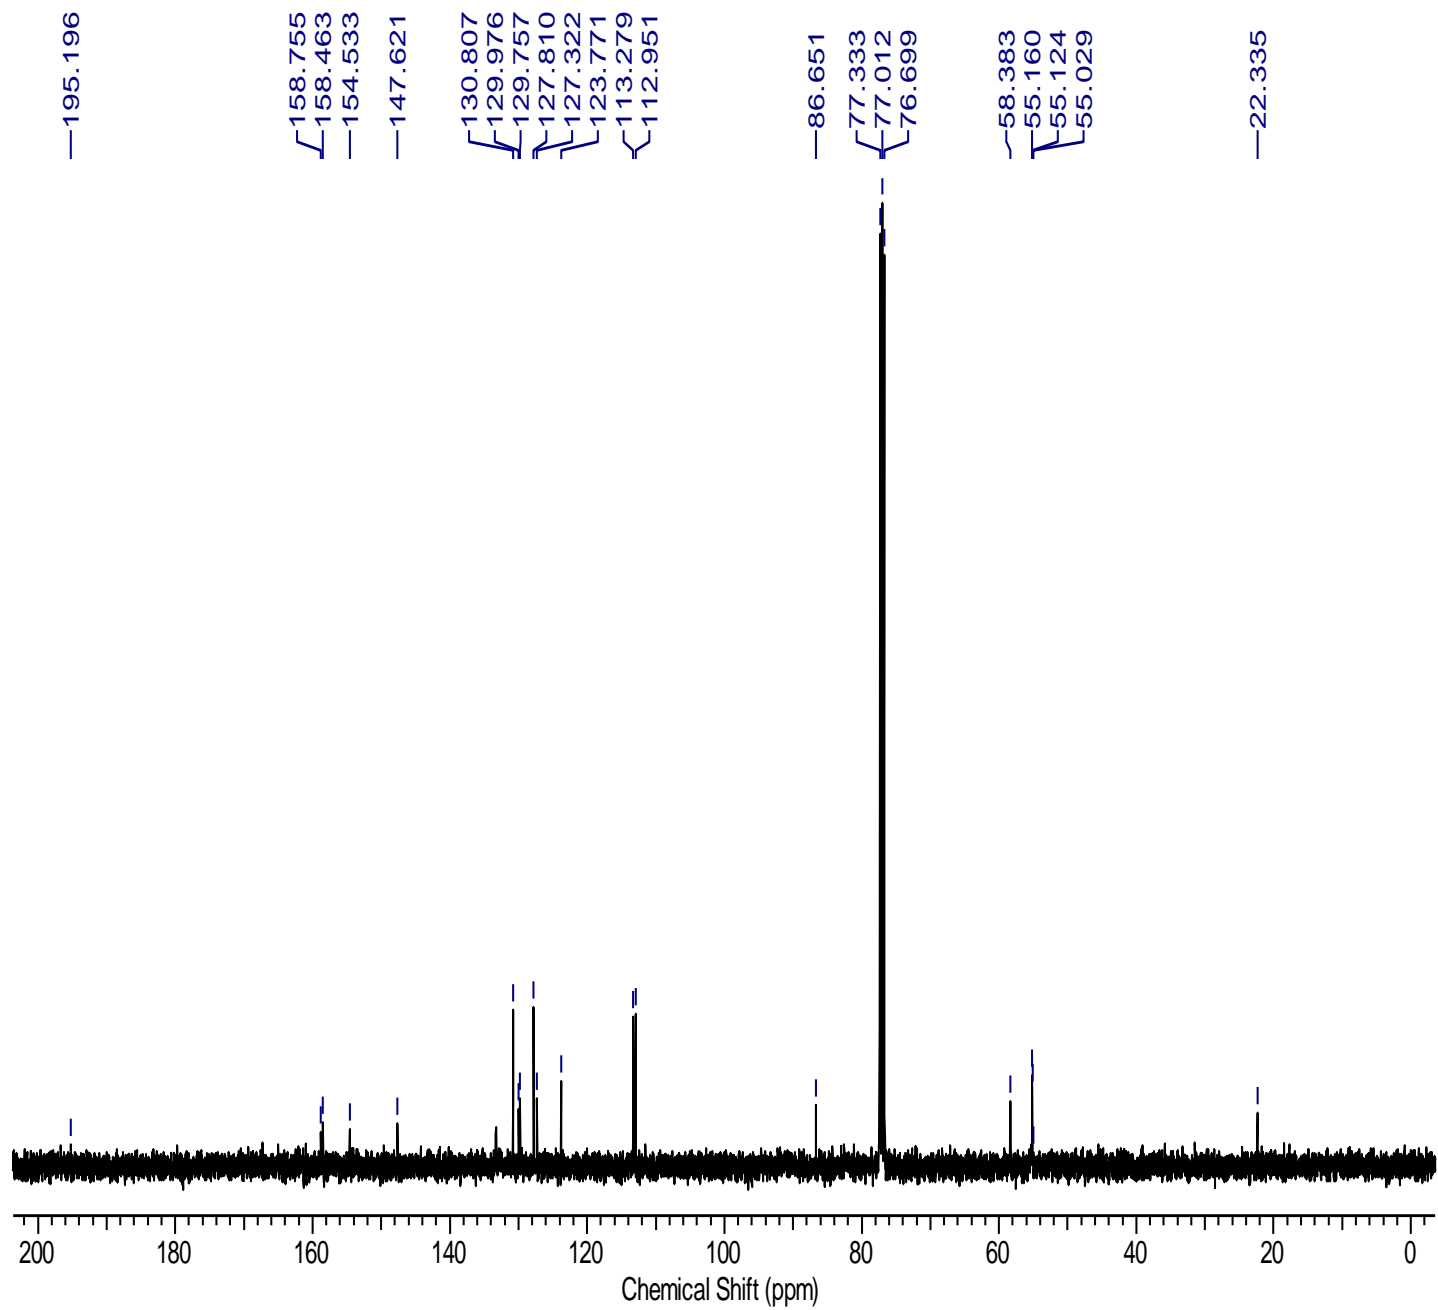

**$^1\text{H}$  (400 MHz) and  $^{13}\text{C}$  (100 MHz) NMR in  $\text{CDCl}_3$  of Compound 3ah**

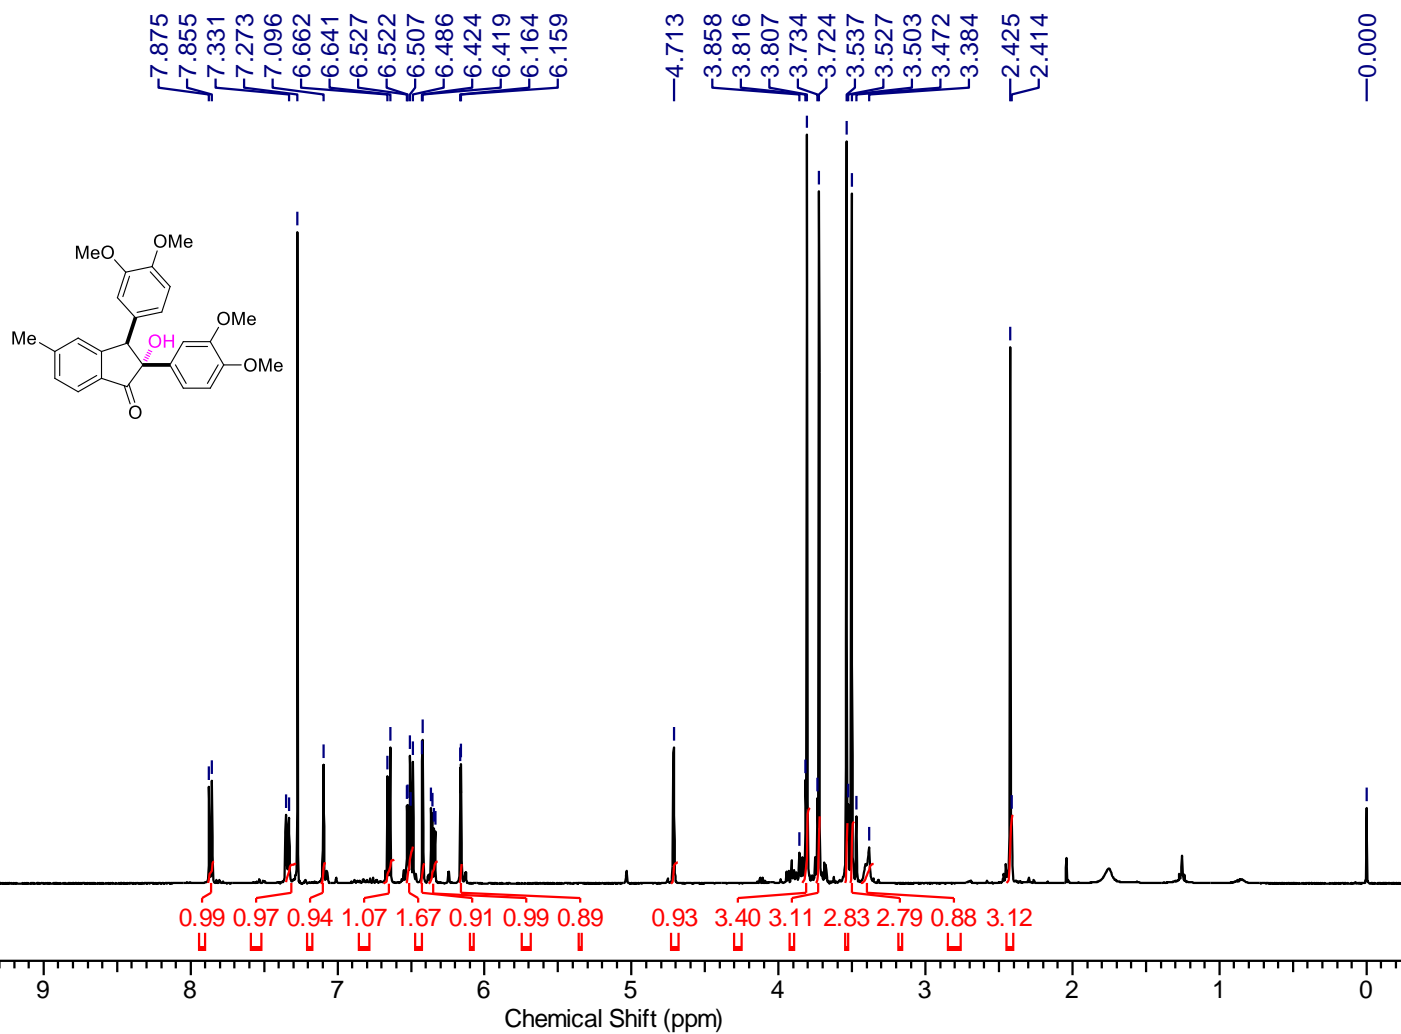

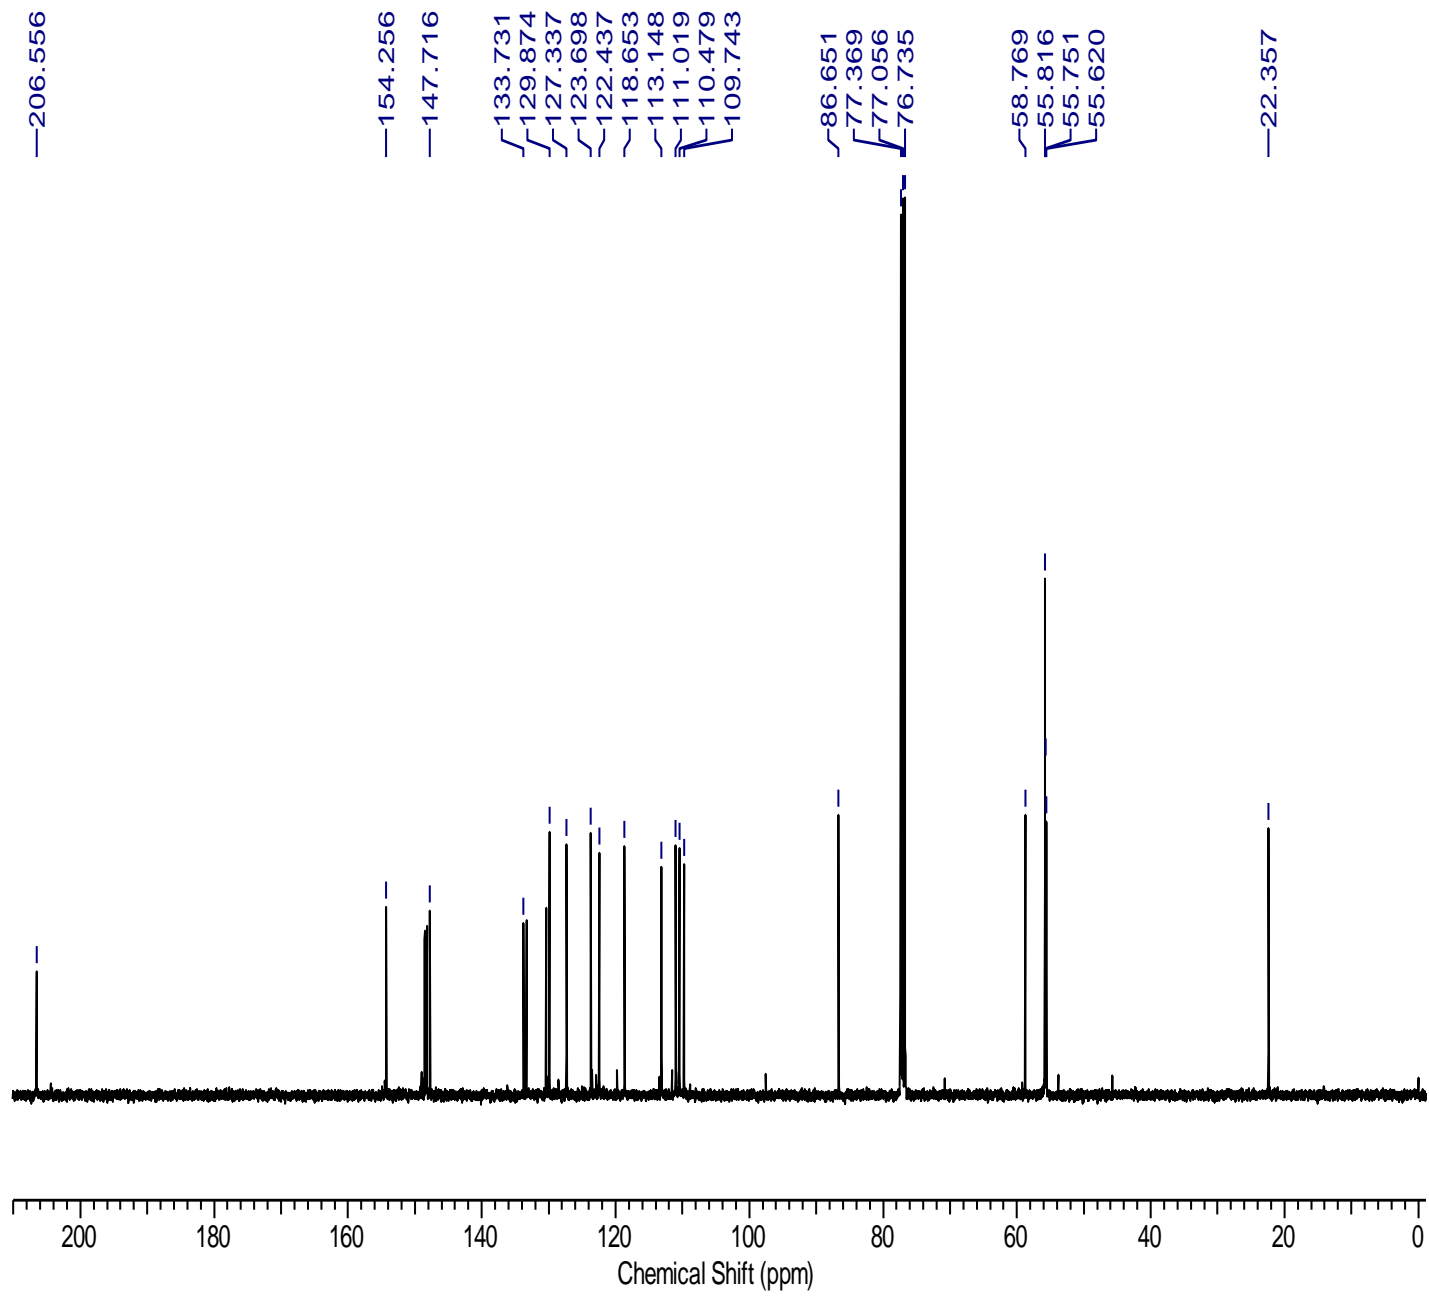

**$^1\text{H}$  (400 MHz) and  $^{13}\text{C}$  (100 MHz) NMR in  $\text{CDCl}_3$  of Compound 3ai**

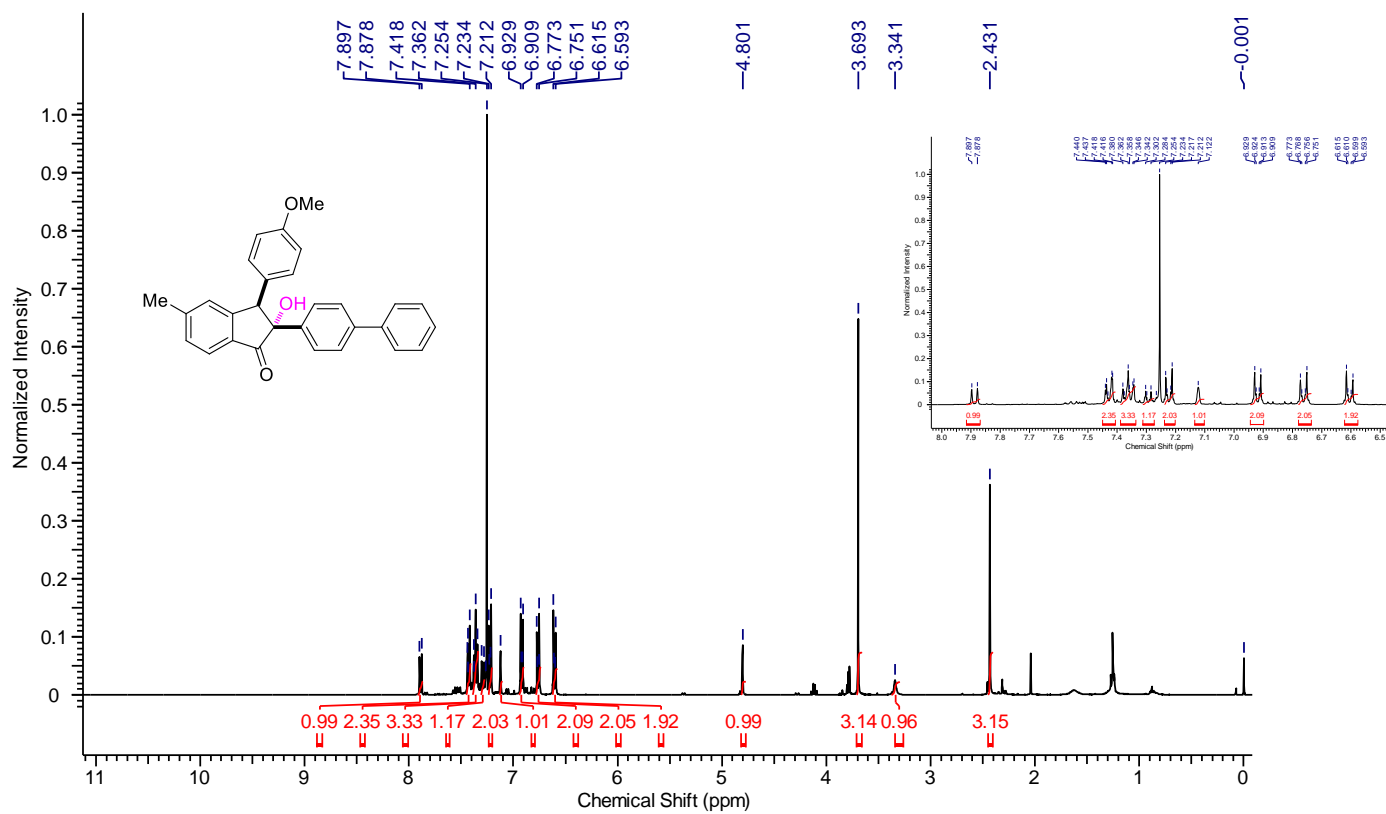

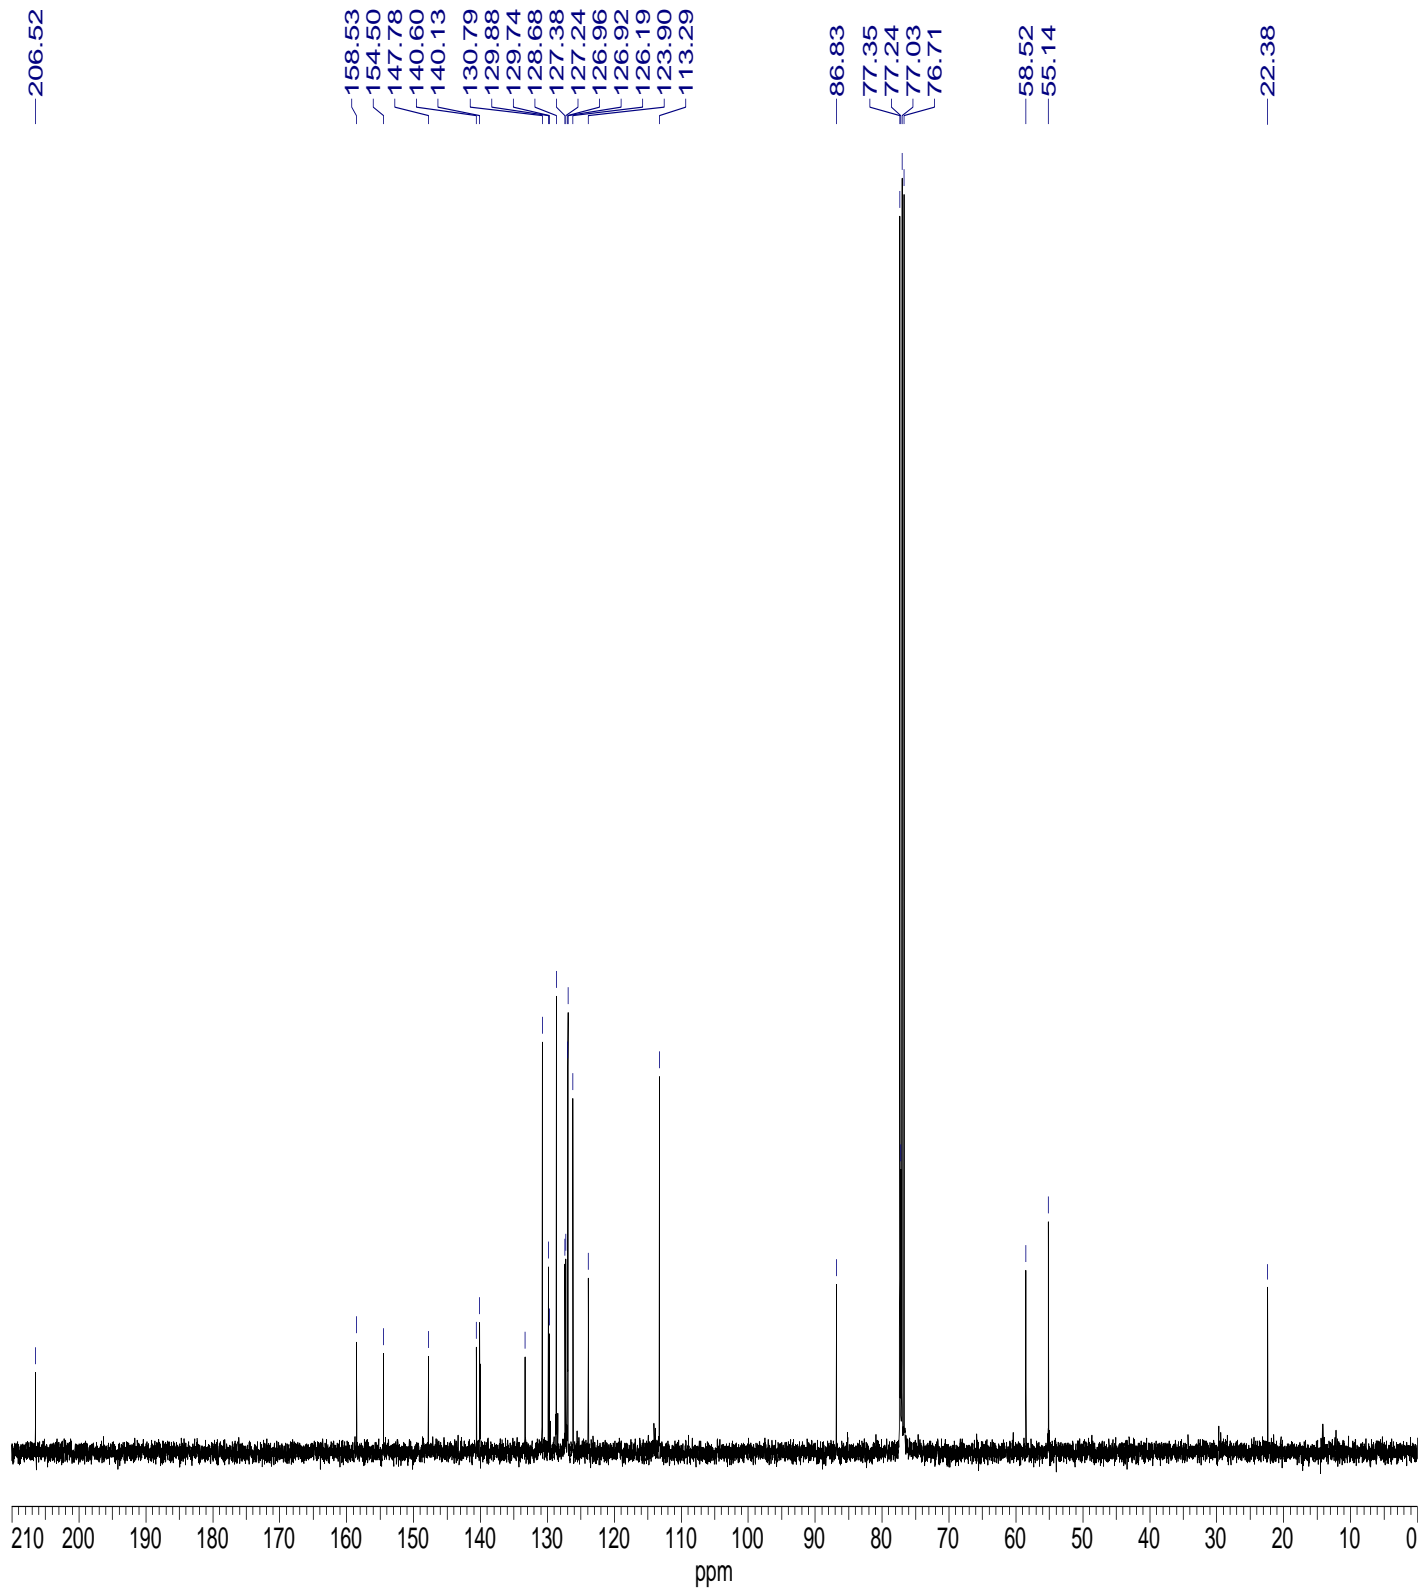

**$^1\text{H}$  (400 MHz) and  $^{13}\text{C}$  (100 MHz) NMR in  $\text{CDCl}_3$  of Compound 3aj**

7.80  
7.78  
7.27  
7.25  
7.19  
7.03  
6.66  
6.63  
6.57  
6.55  
6.53  
6.35

4.66

3.65

3.11

2.35

1.95

0.00

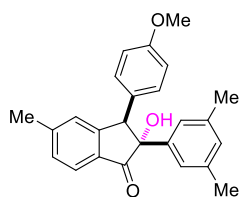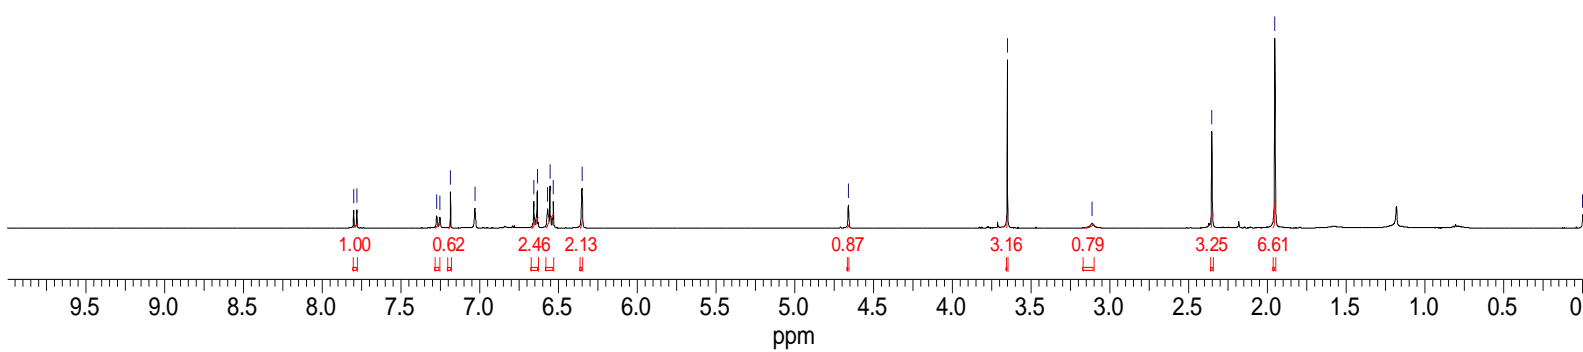

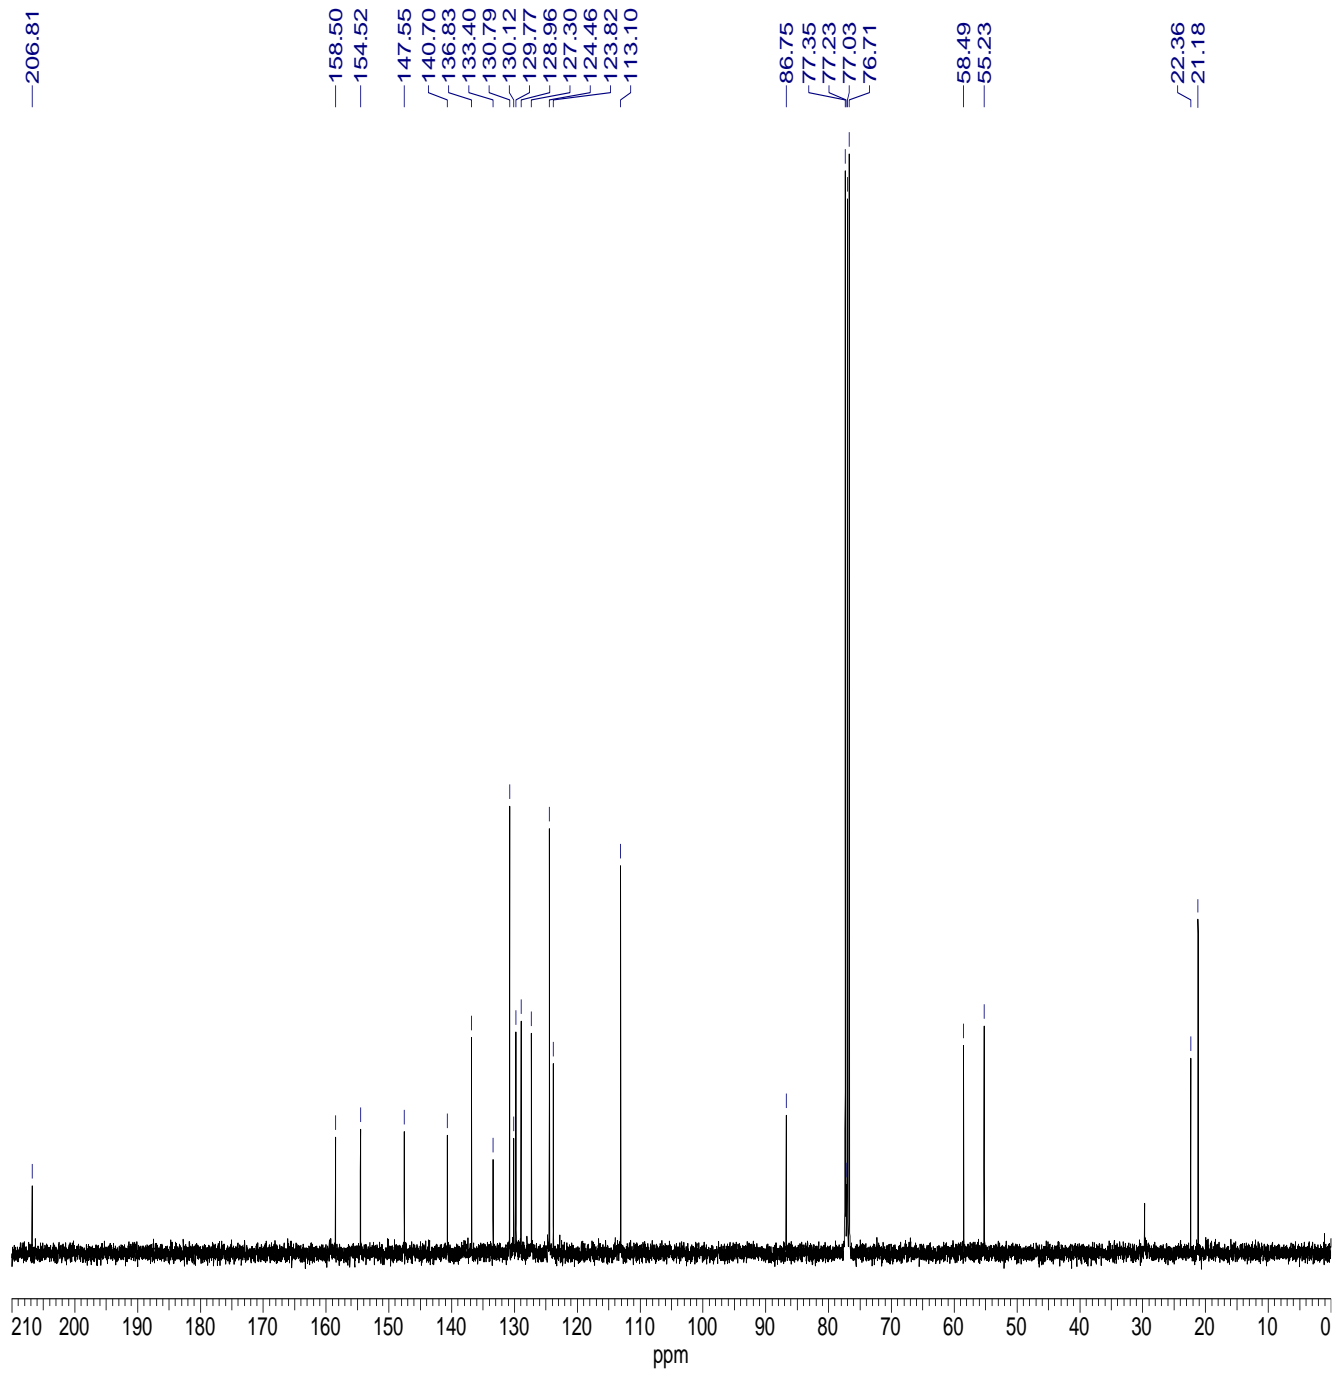

<sup>1</sup>H (400 MHz) and <sup>13</sup>C (100 MHz) NMR in CDCl<sub>3</sub> of Compound 3ak

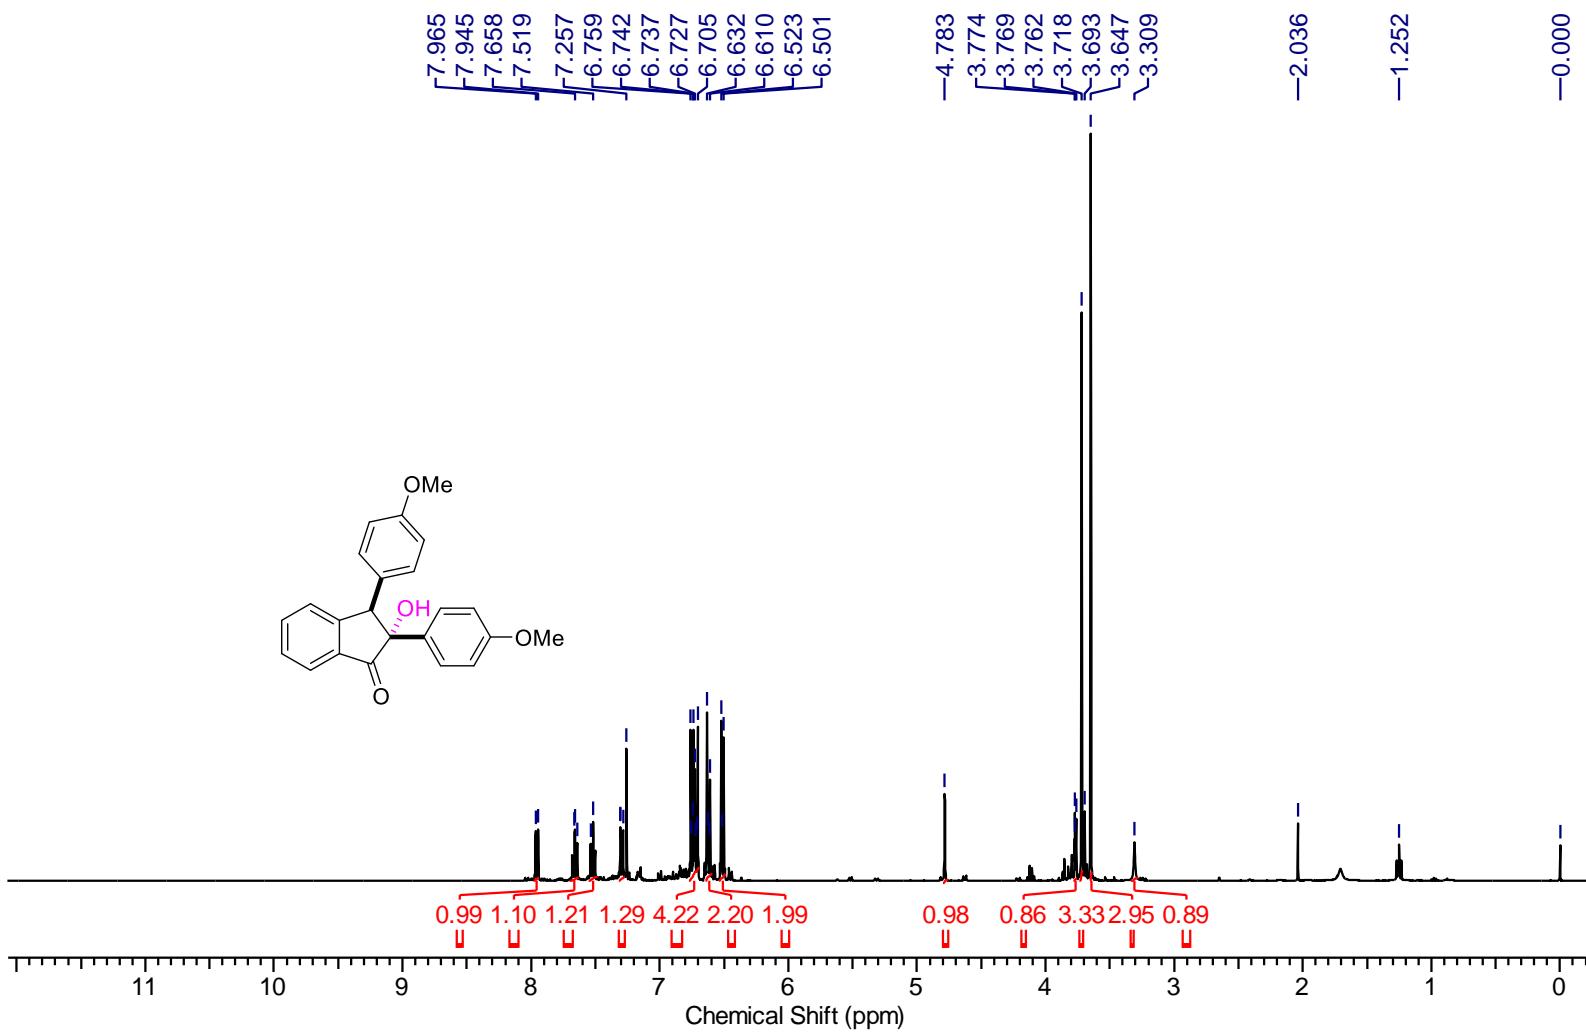



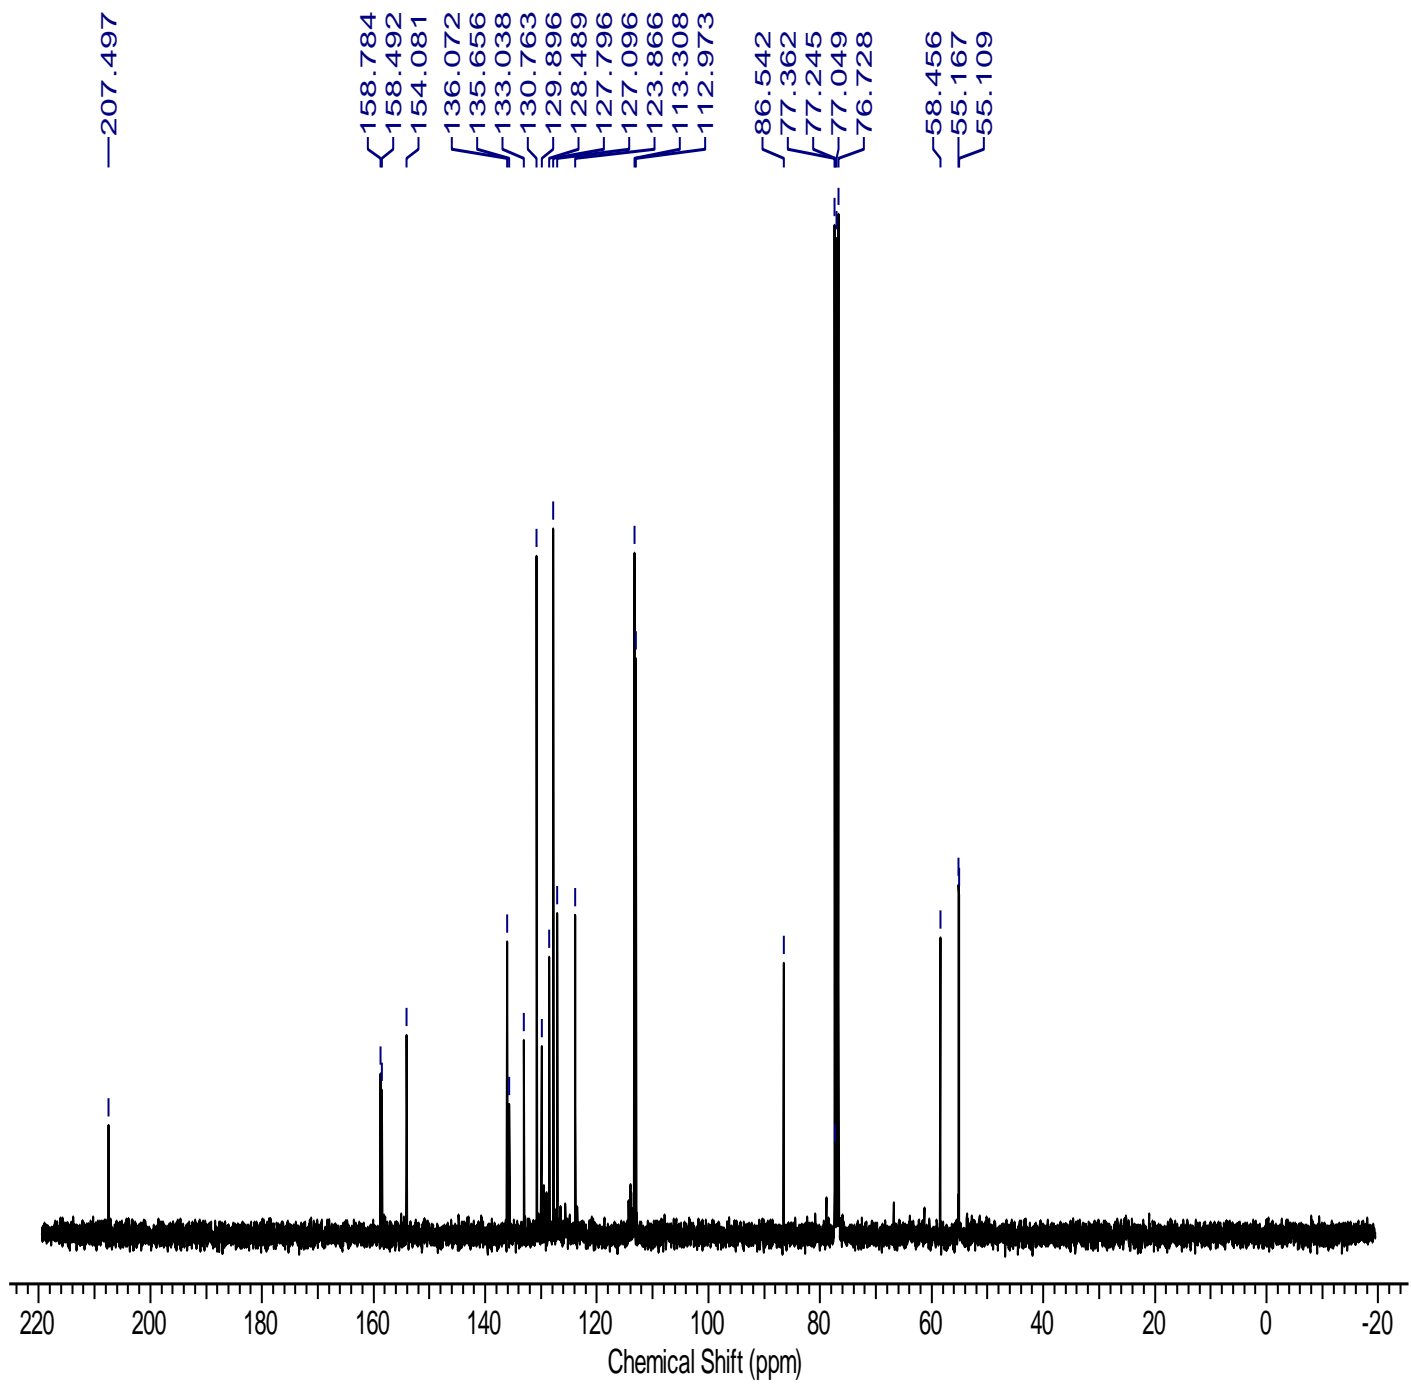

**$^1\text{H}$  (400 MHz) and  $^{13}\text{C}$  (100 MHz) NMR in  $\text{CDCl}_3$  of Compound 1a**

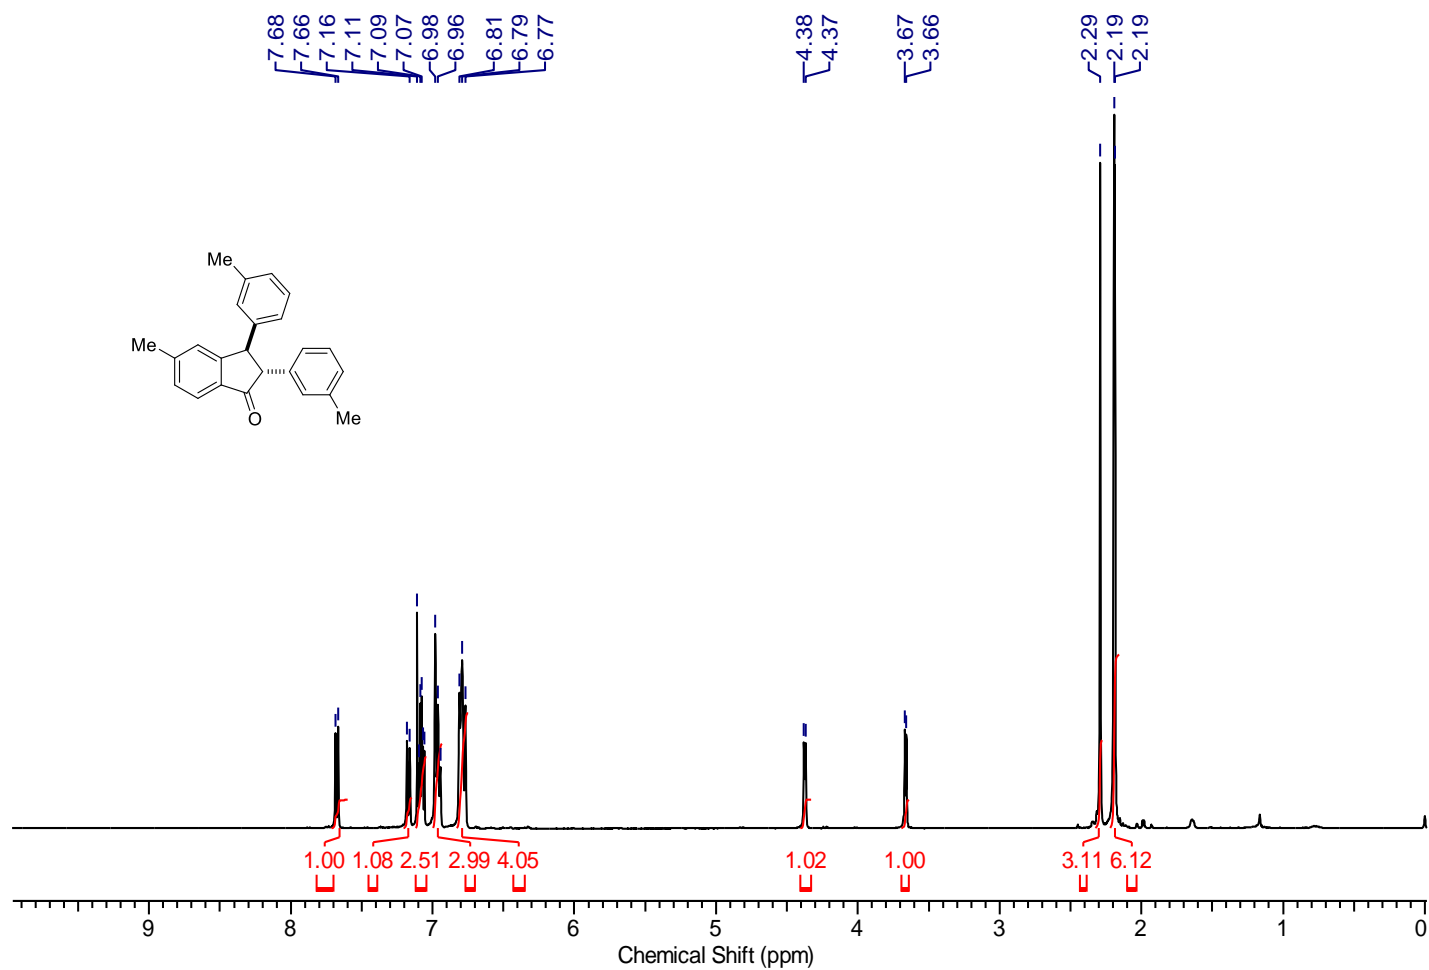

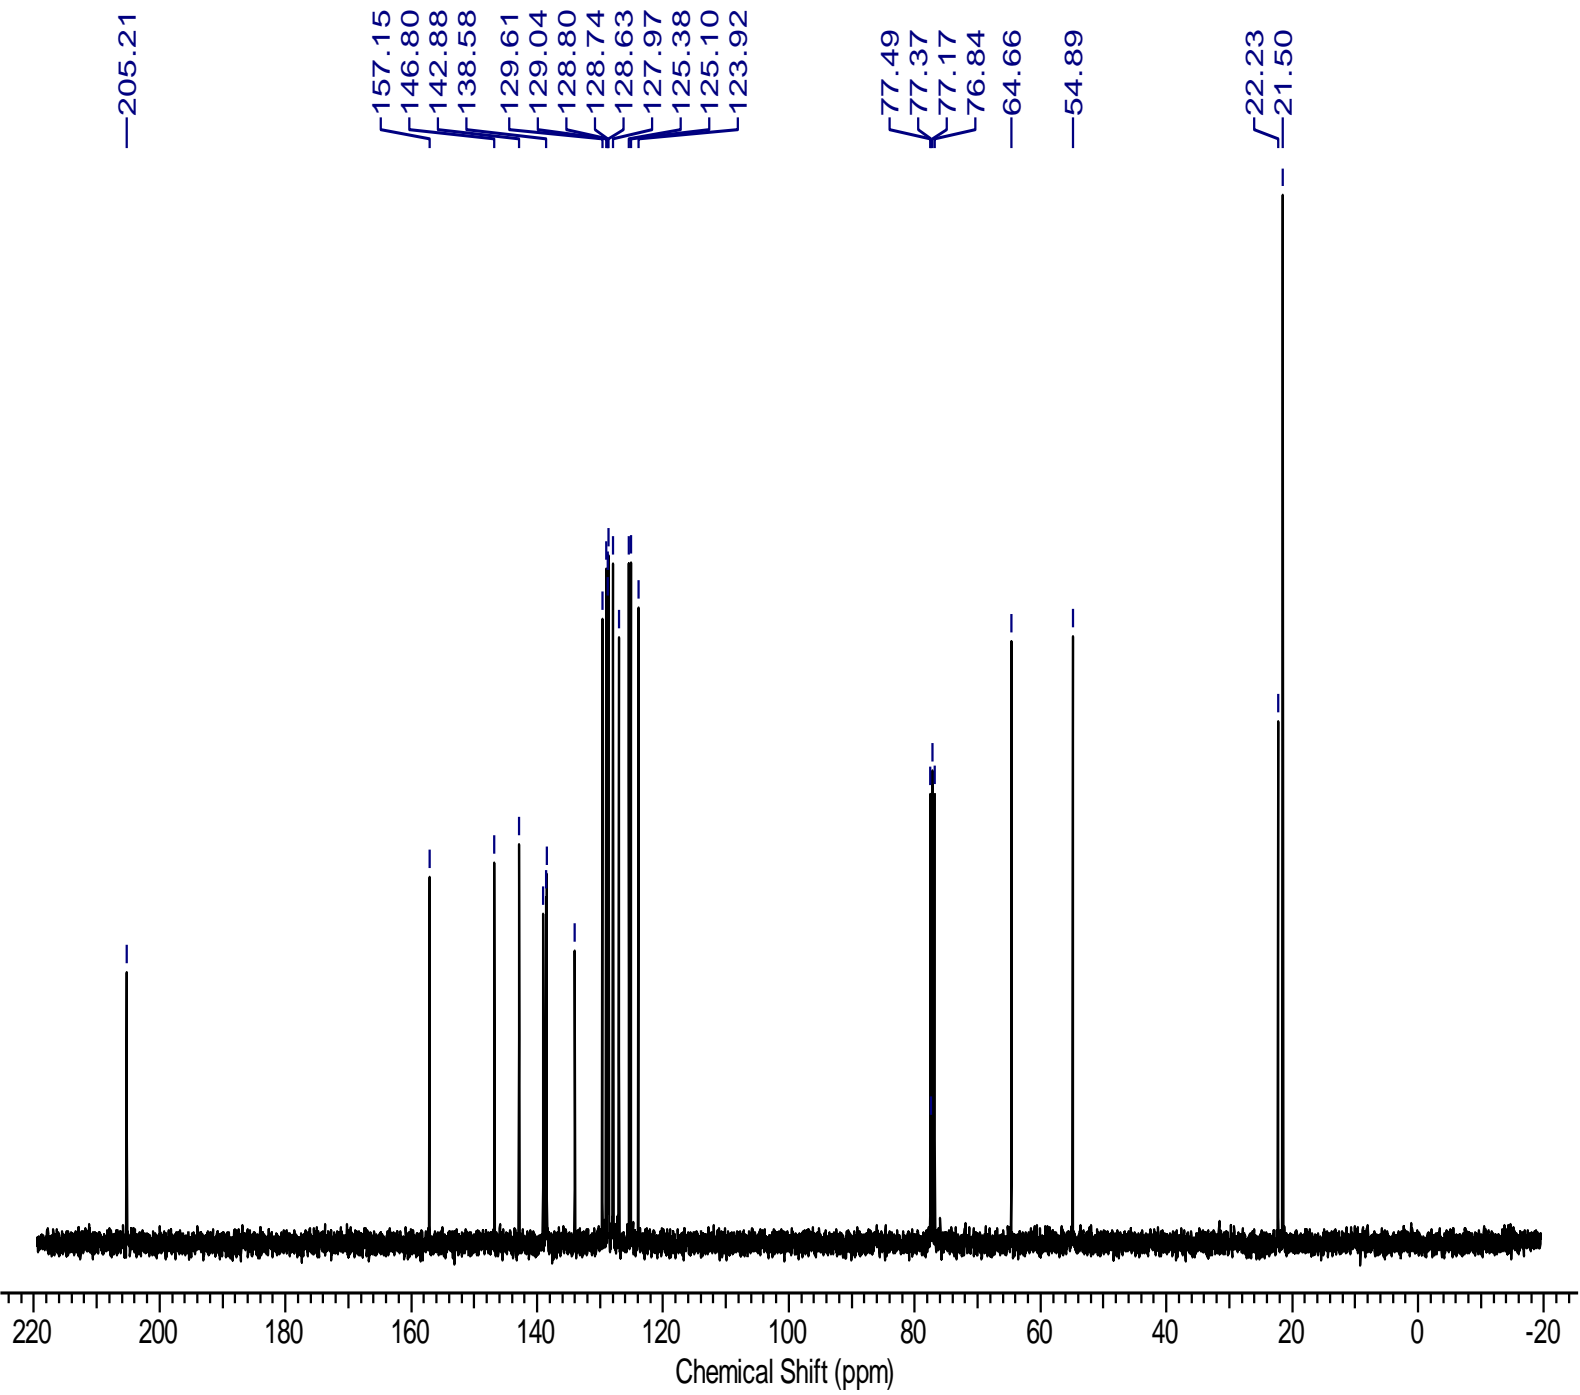

**$^1\text{H}$  (400 MHz) and  $^{13}\text{C}$  (100 MHz) NMR in  $\text{CDCl}_3$  of Compound 1b**

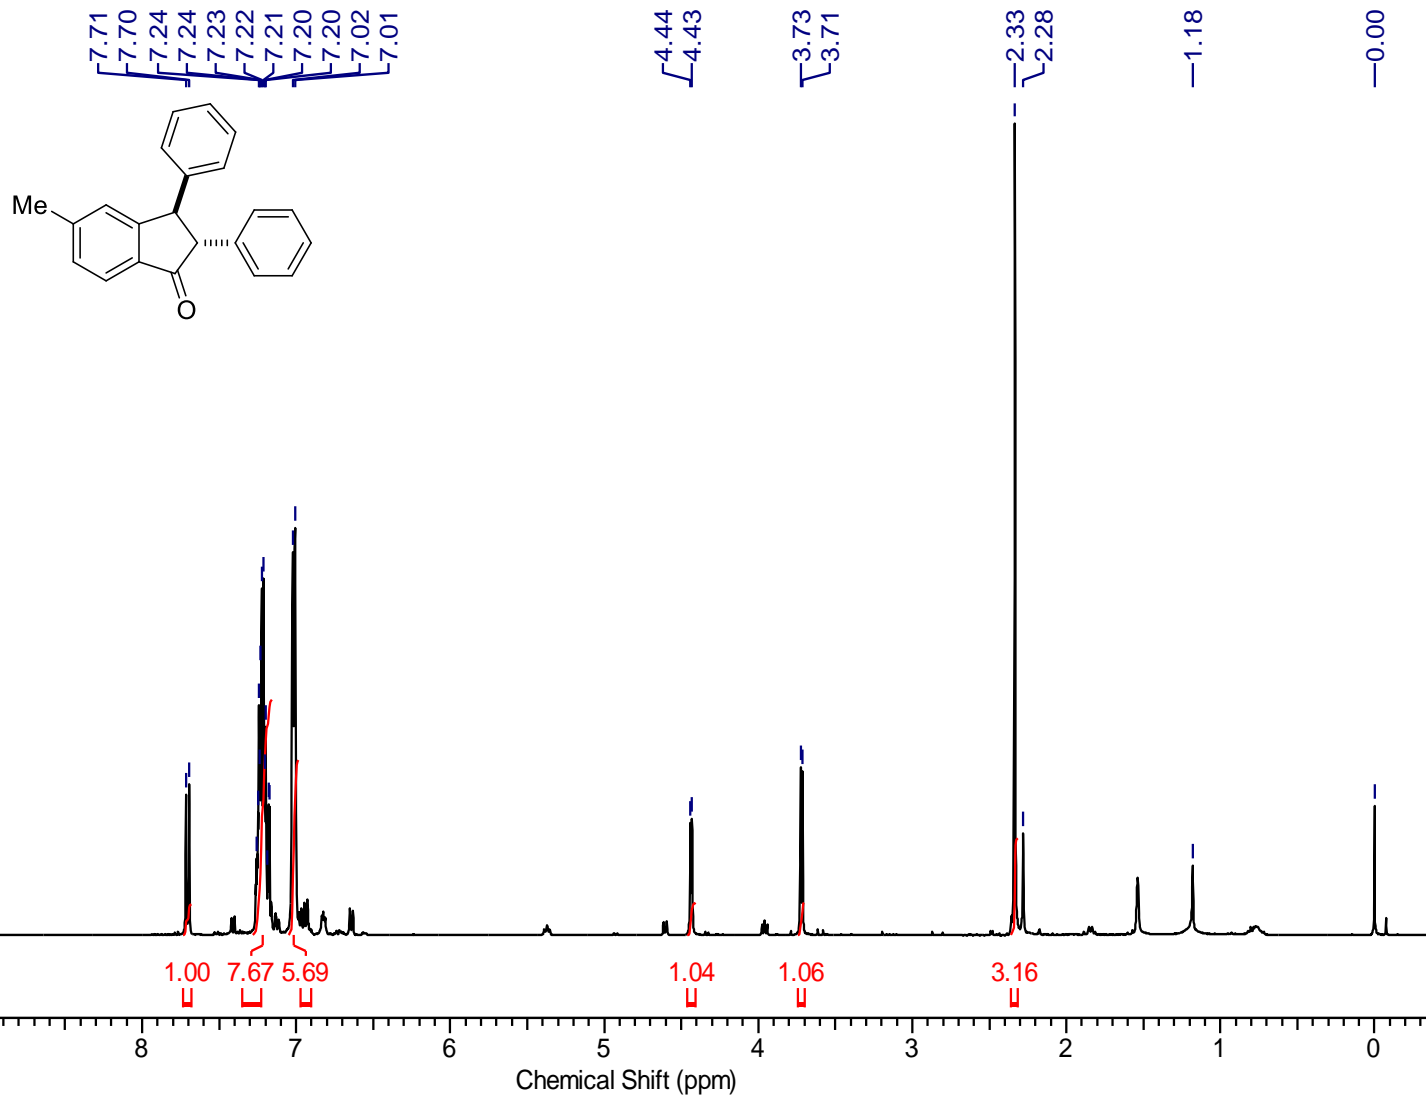

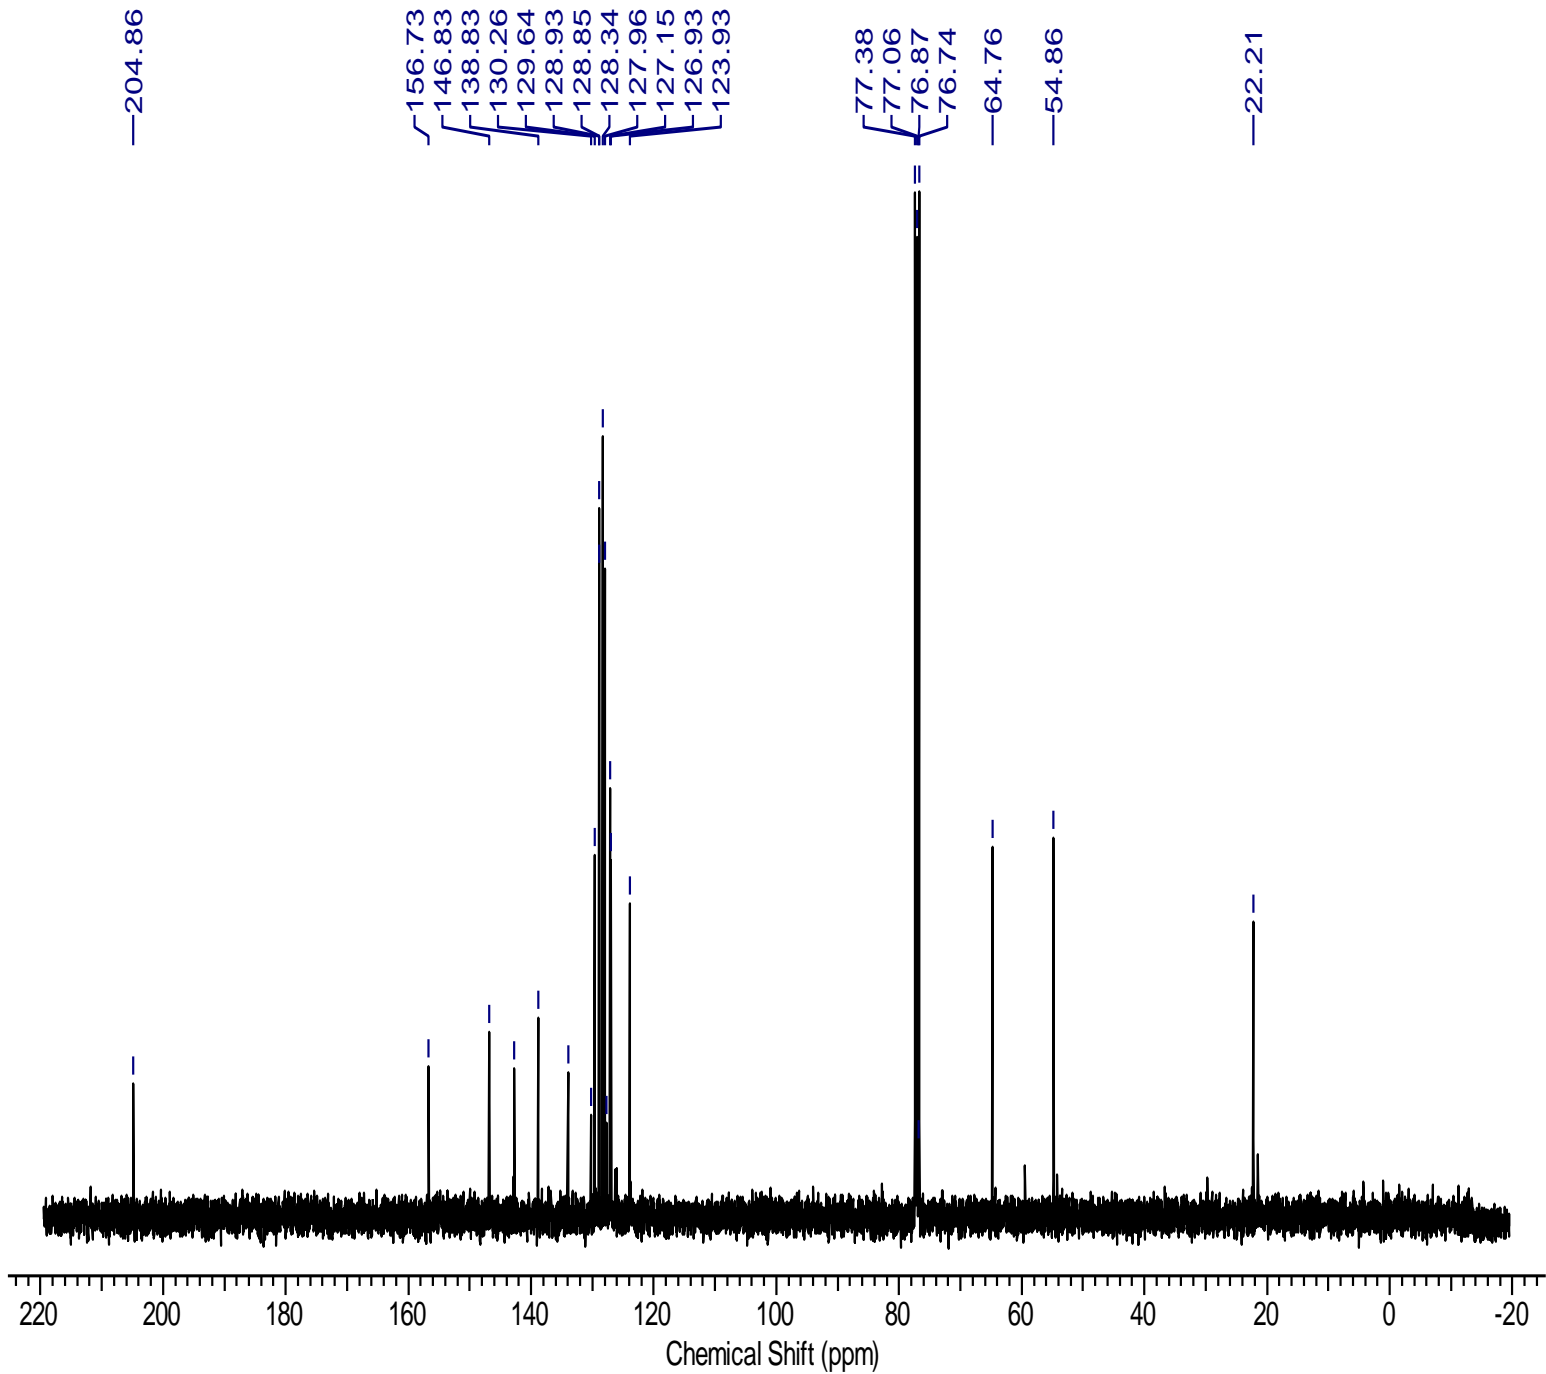

**$^1\text{H}$  (400 MHz) and  $^{13}\text{C}$  (100 MHz) NMR in  $\text{CDCl}_3$  of Compound 1c**

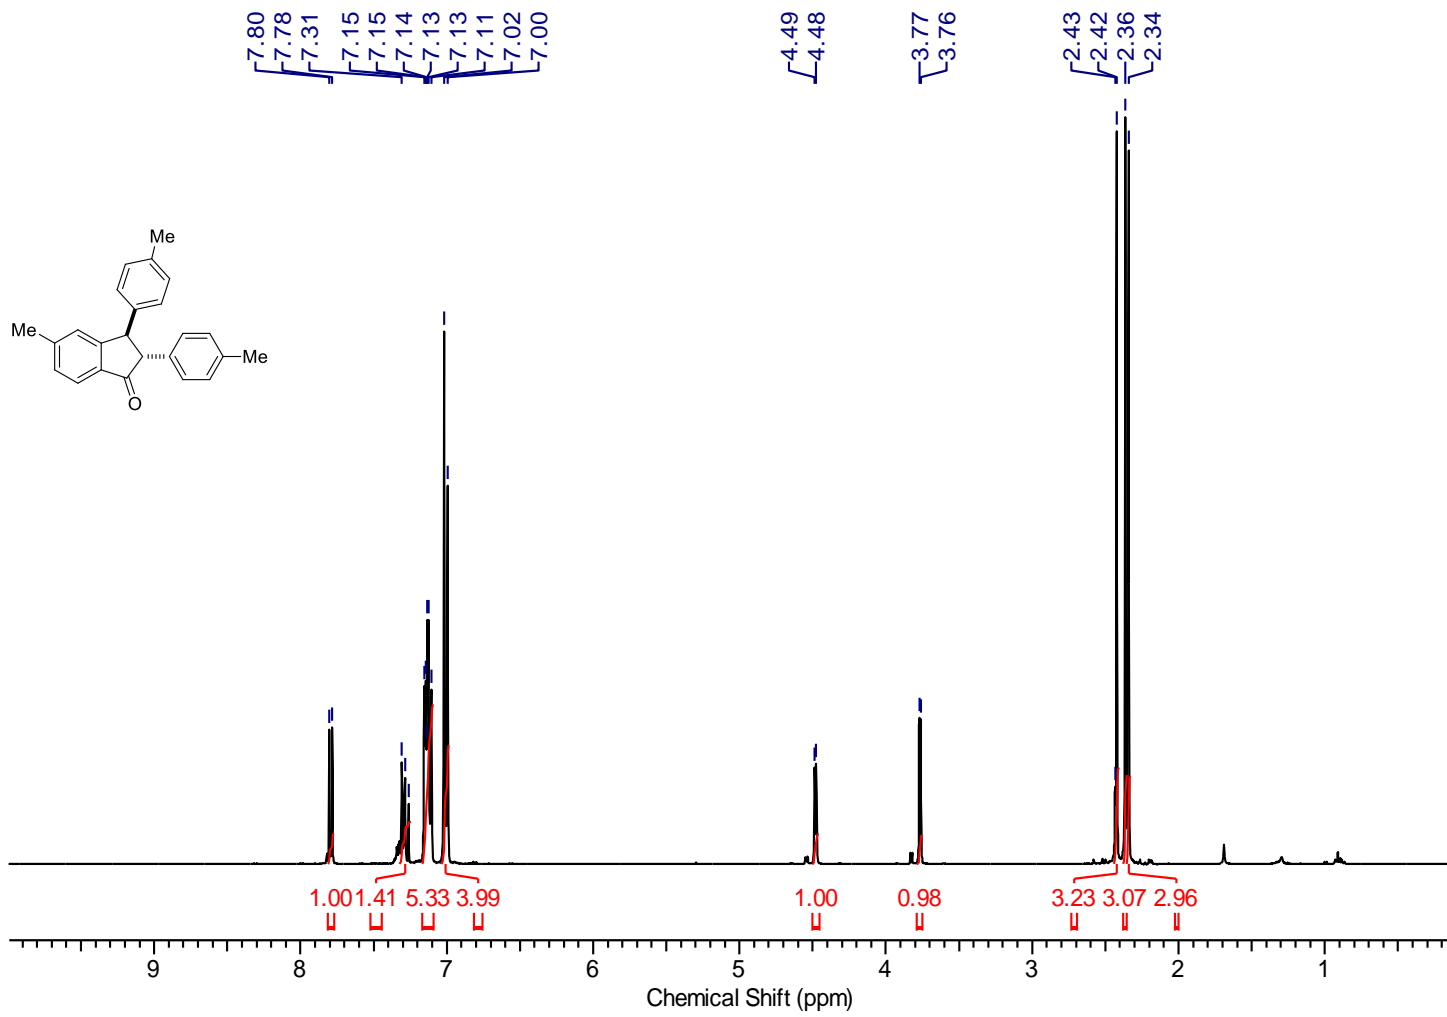

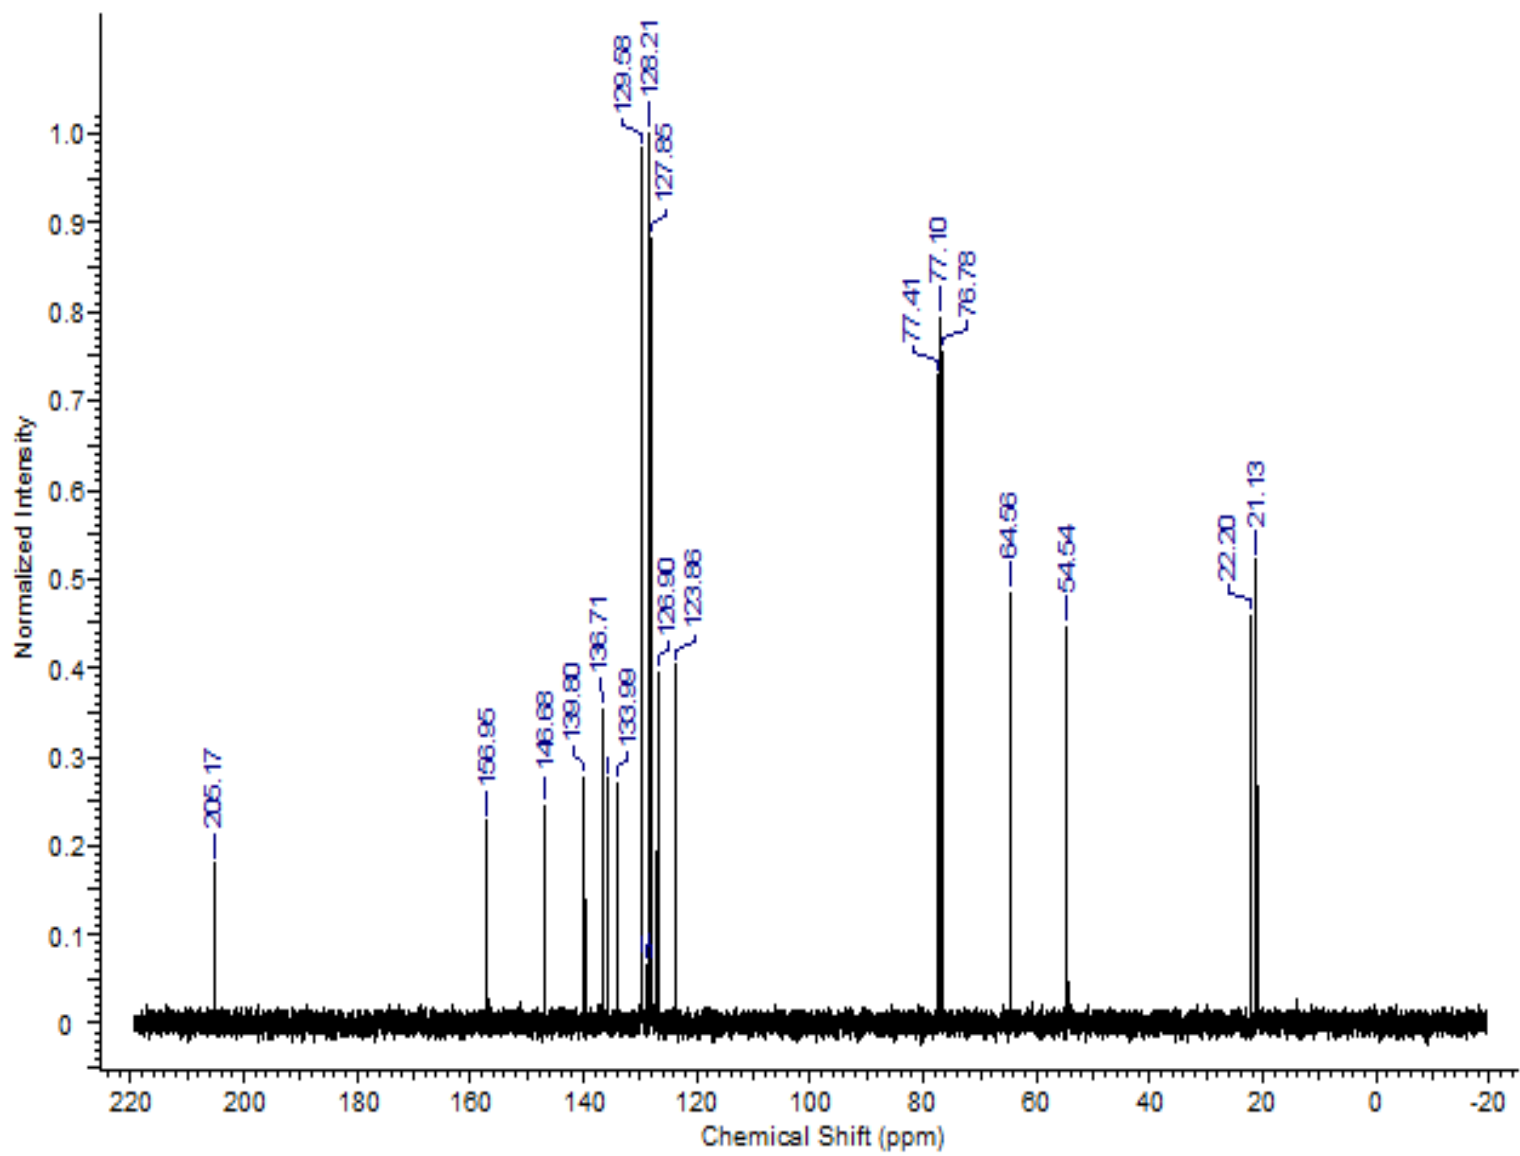

**$^1\text{H}$  (400 MHz) and  $^{13}\text{C}$  (100 MHz) NMR in  $\text{CDCl}_3$  of Compound 1d**

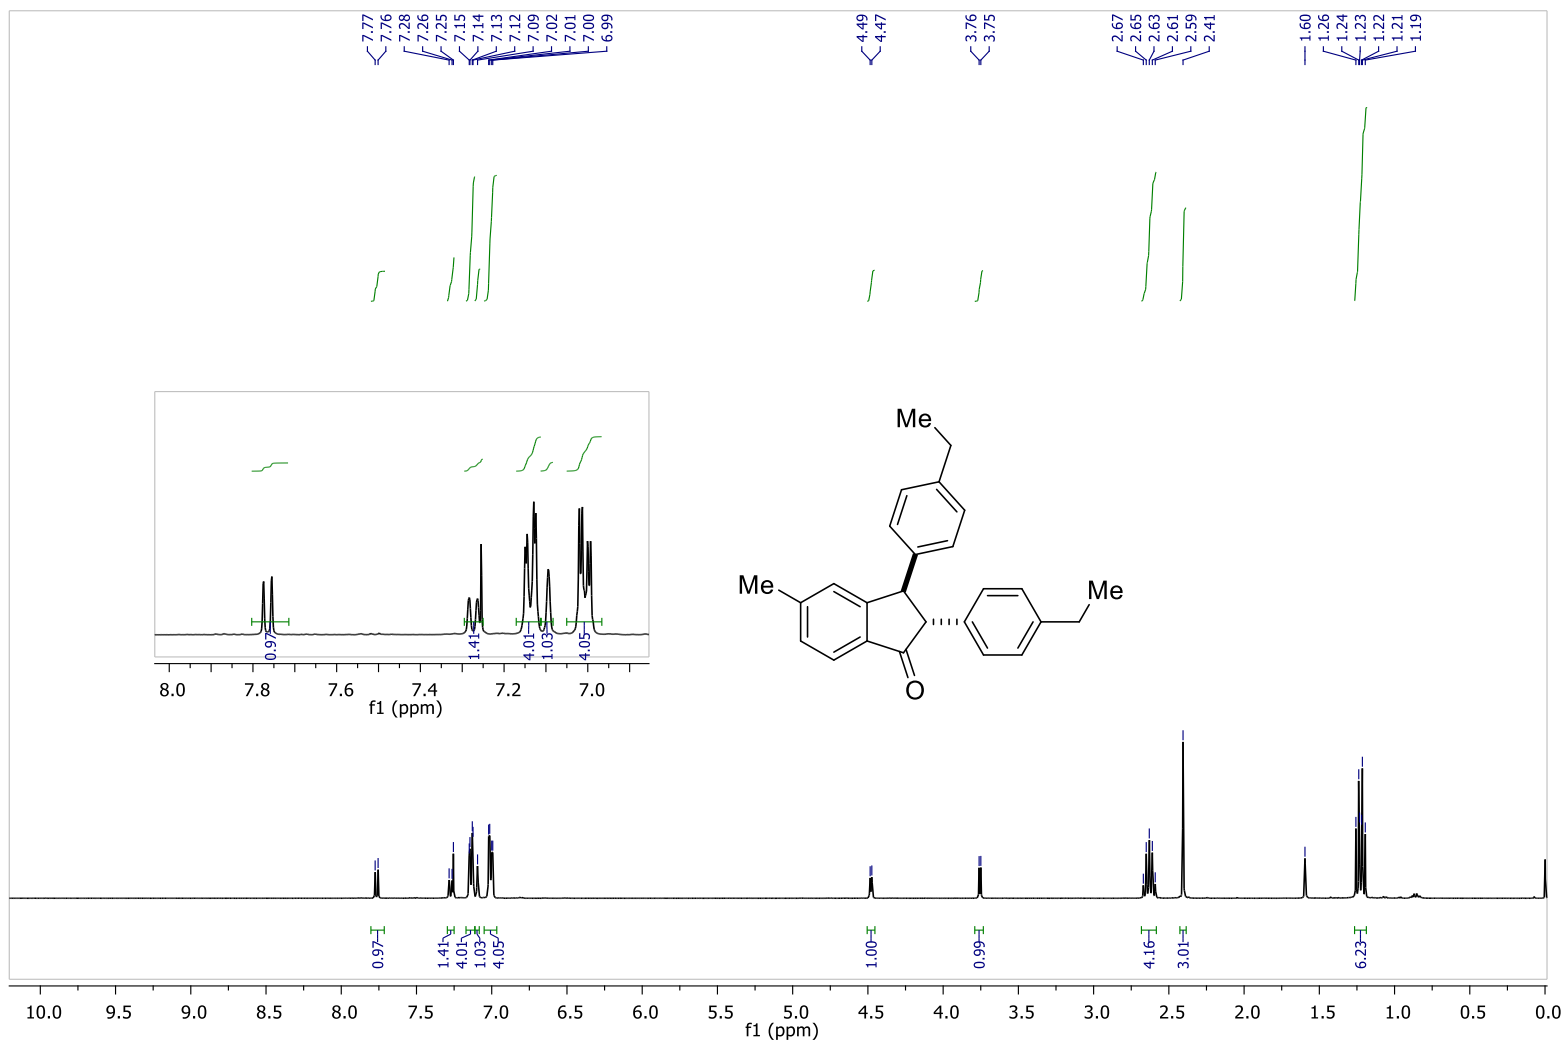



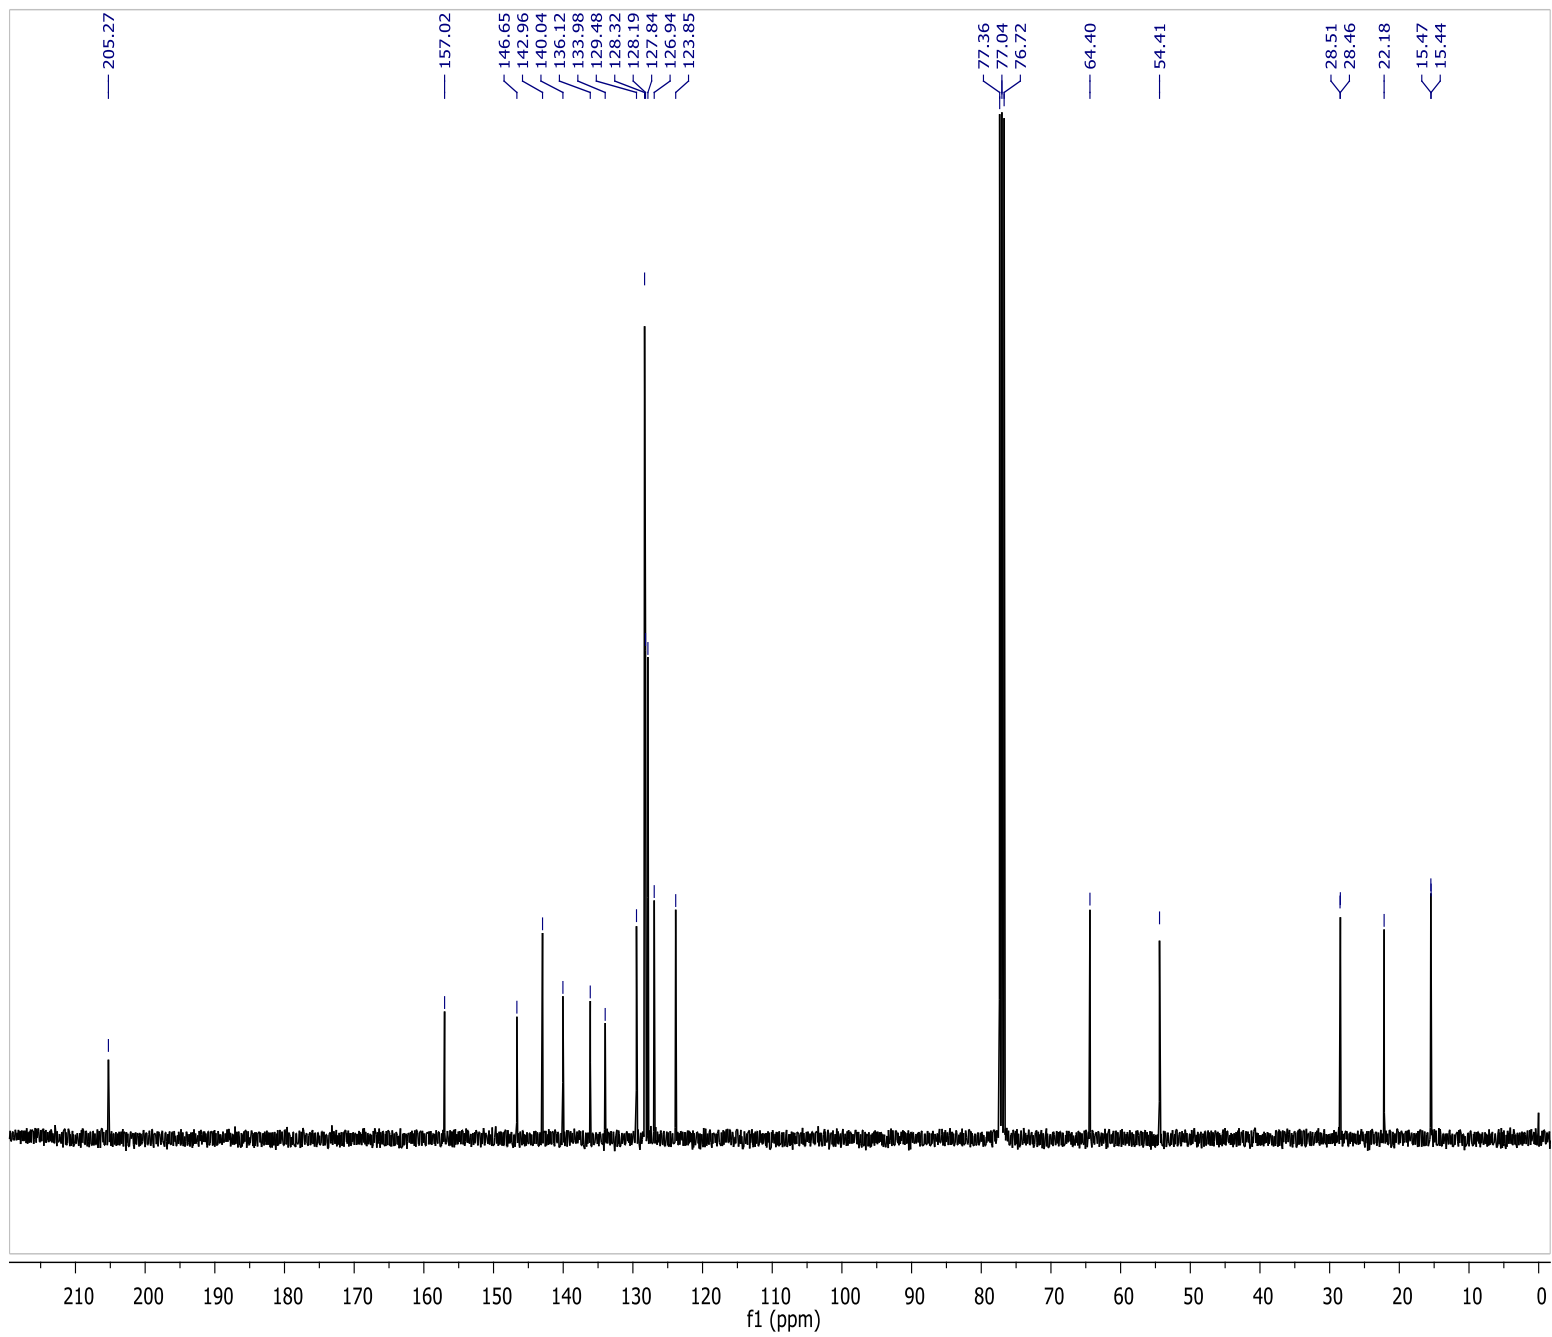

**$^1\text{H}$  (400 MHz) and  $^{13}\text{C}$  (100 MHz) NMR in  $\text{CDCl}_3$  of Compound **1e****

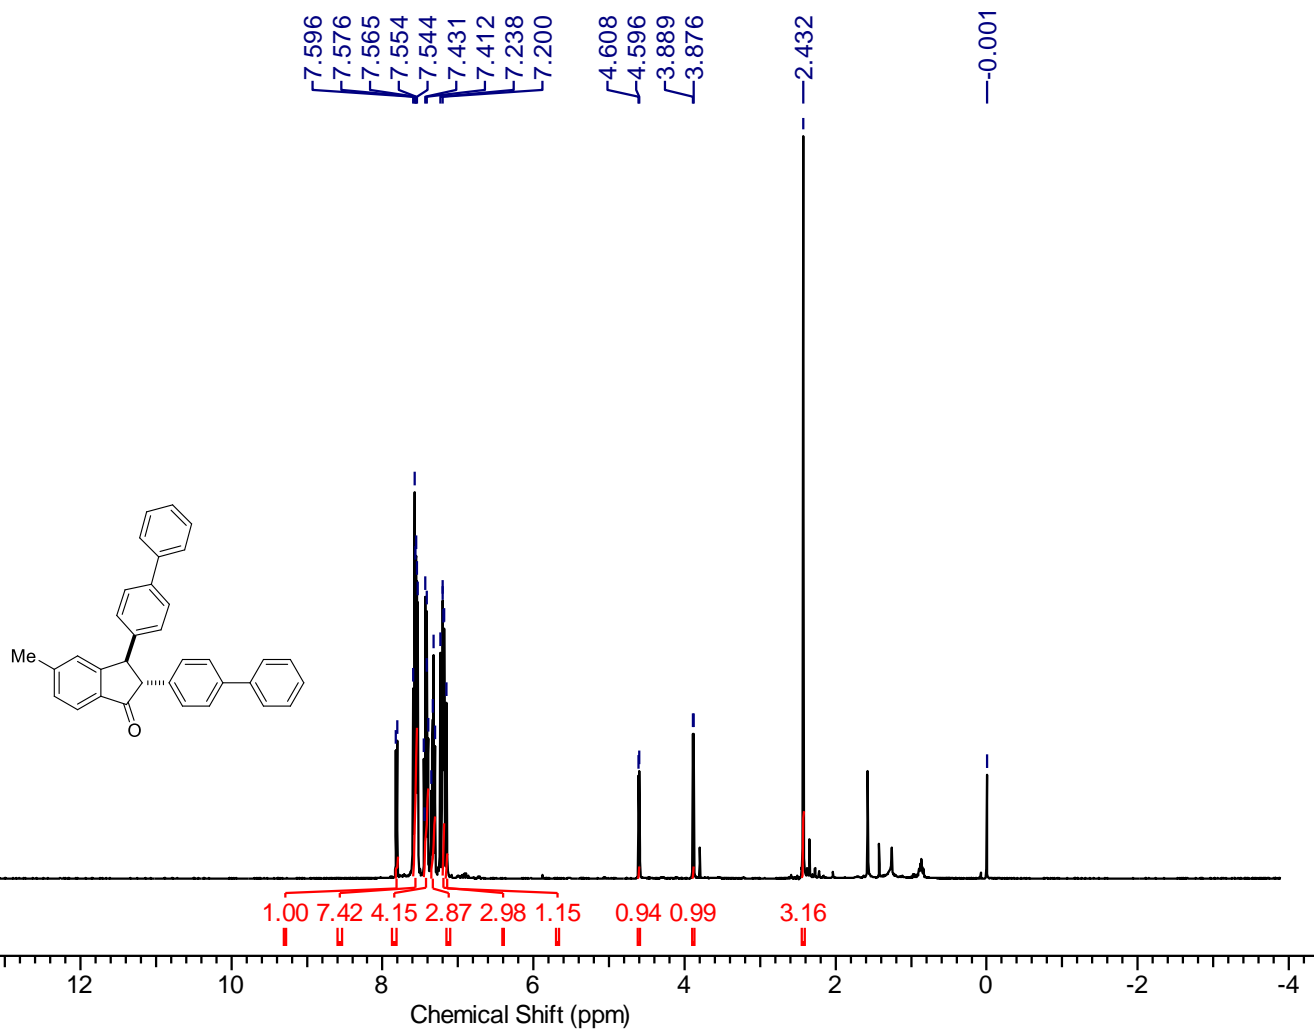

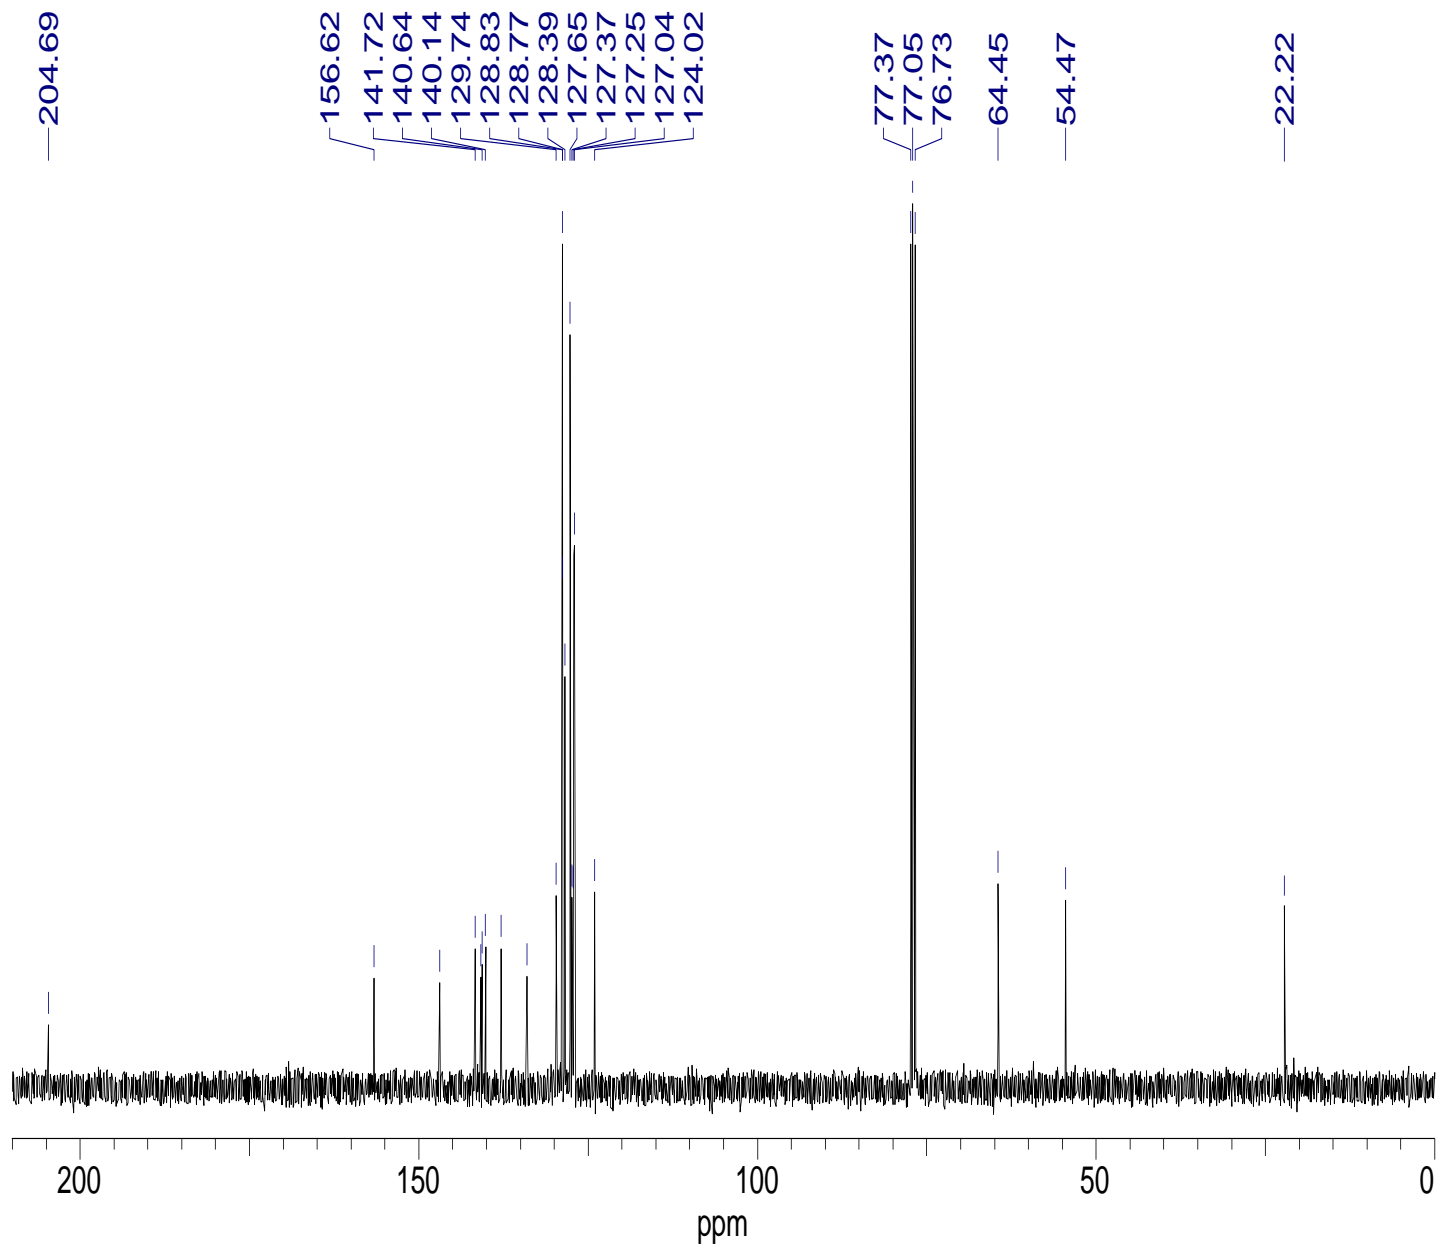

**$^1\text{H}$  (400 MHz) and  $^{13}\text{C}$  (100 MHz) NMR in  $\text{CDCl}_3$  of Compound 1f**

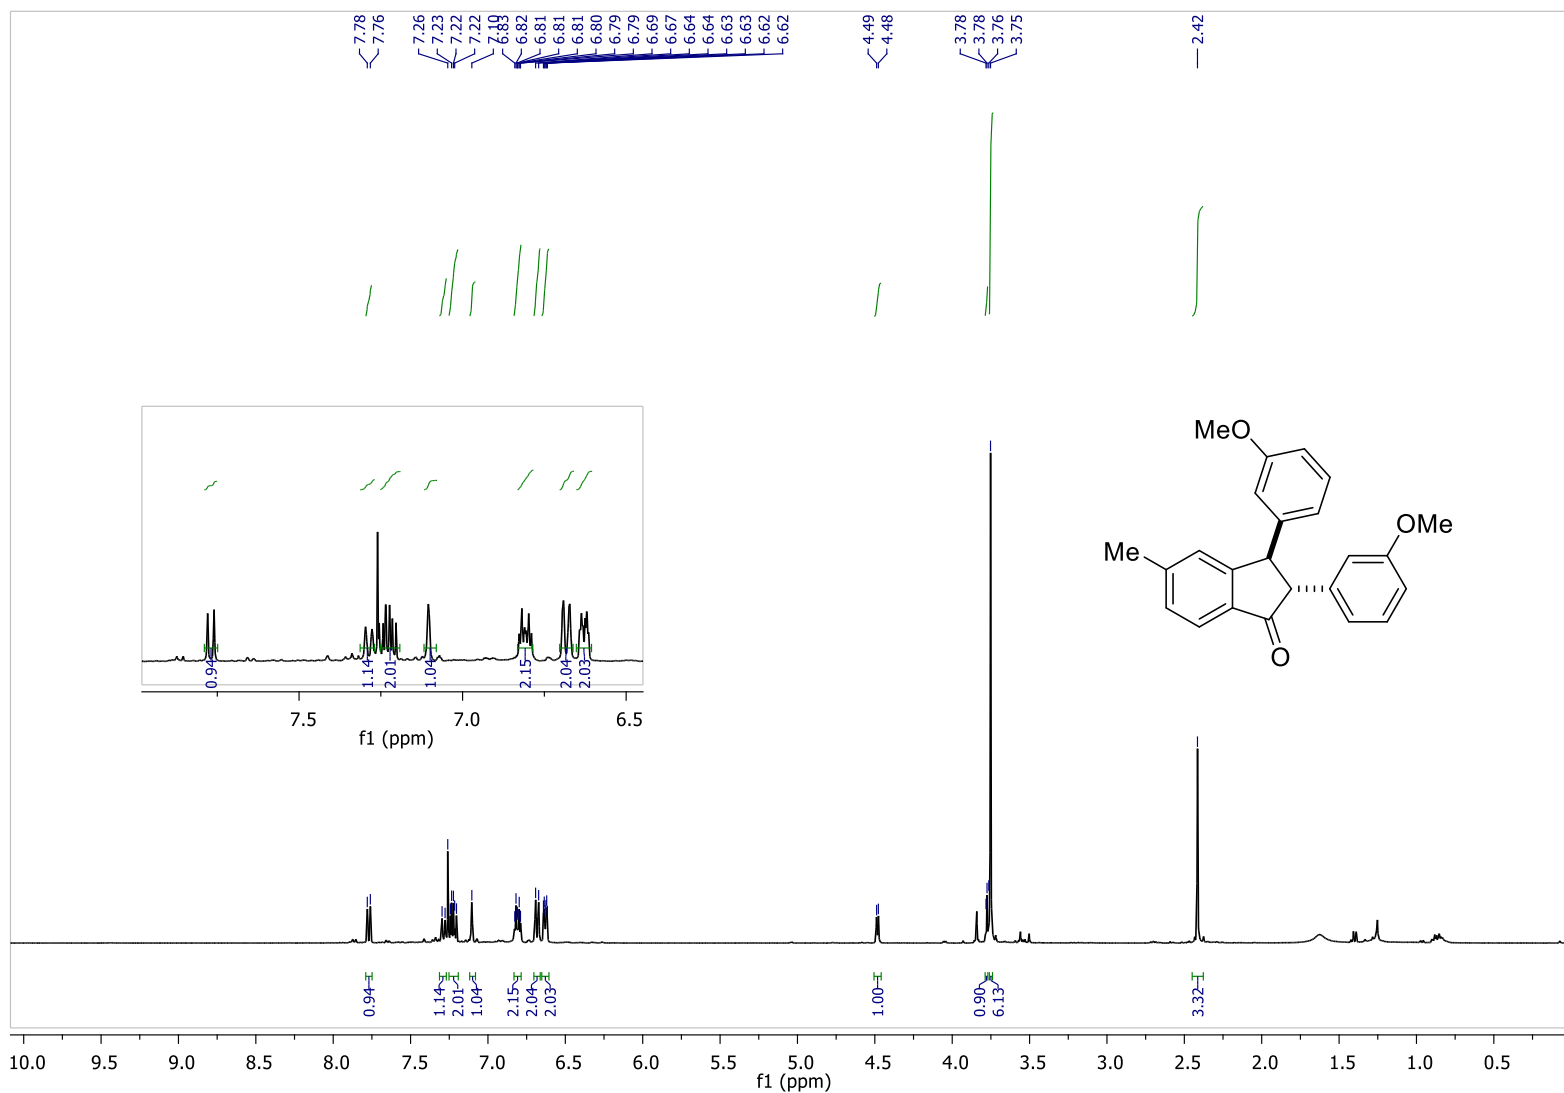

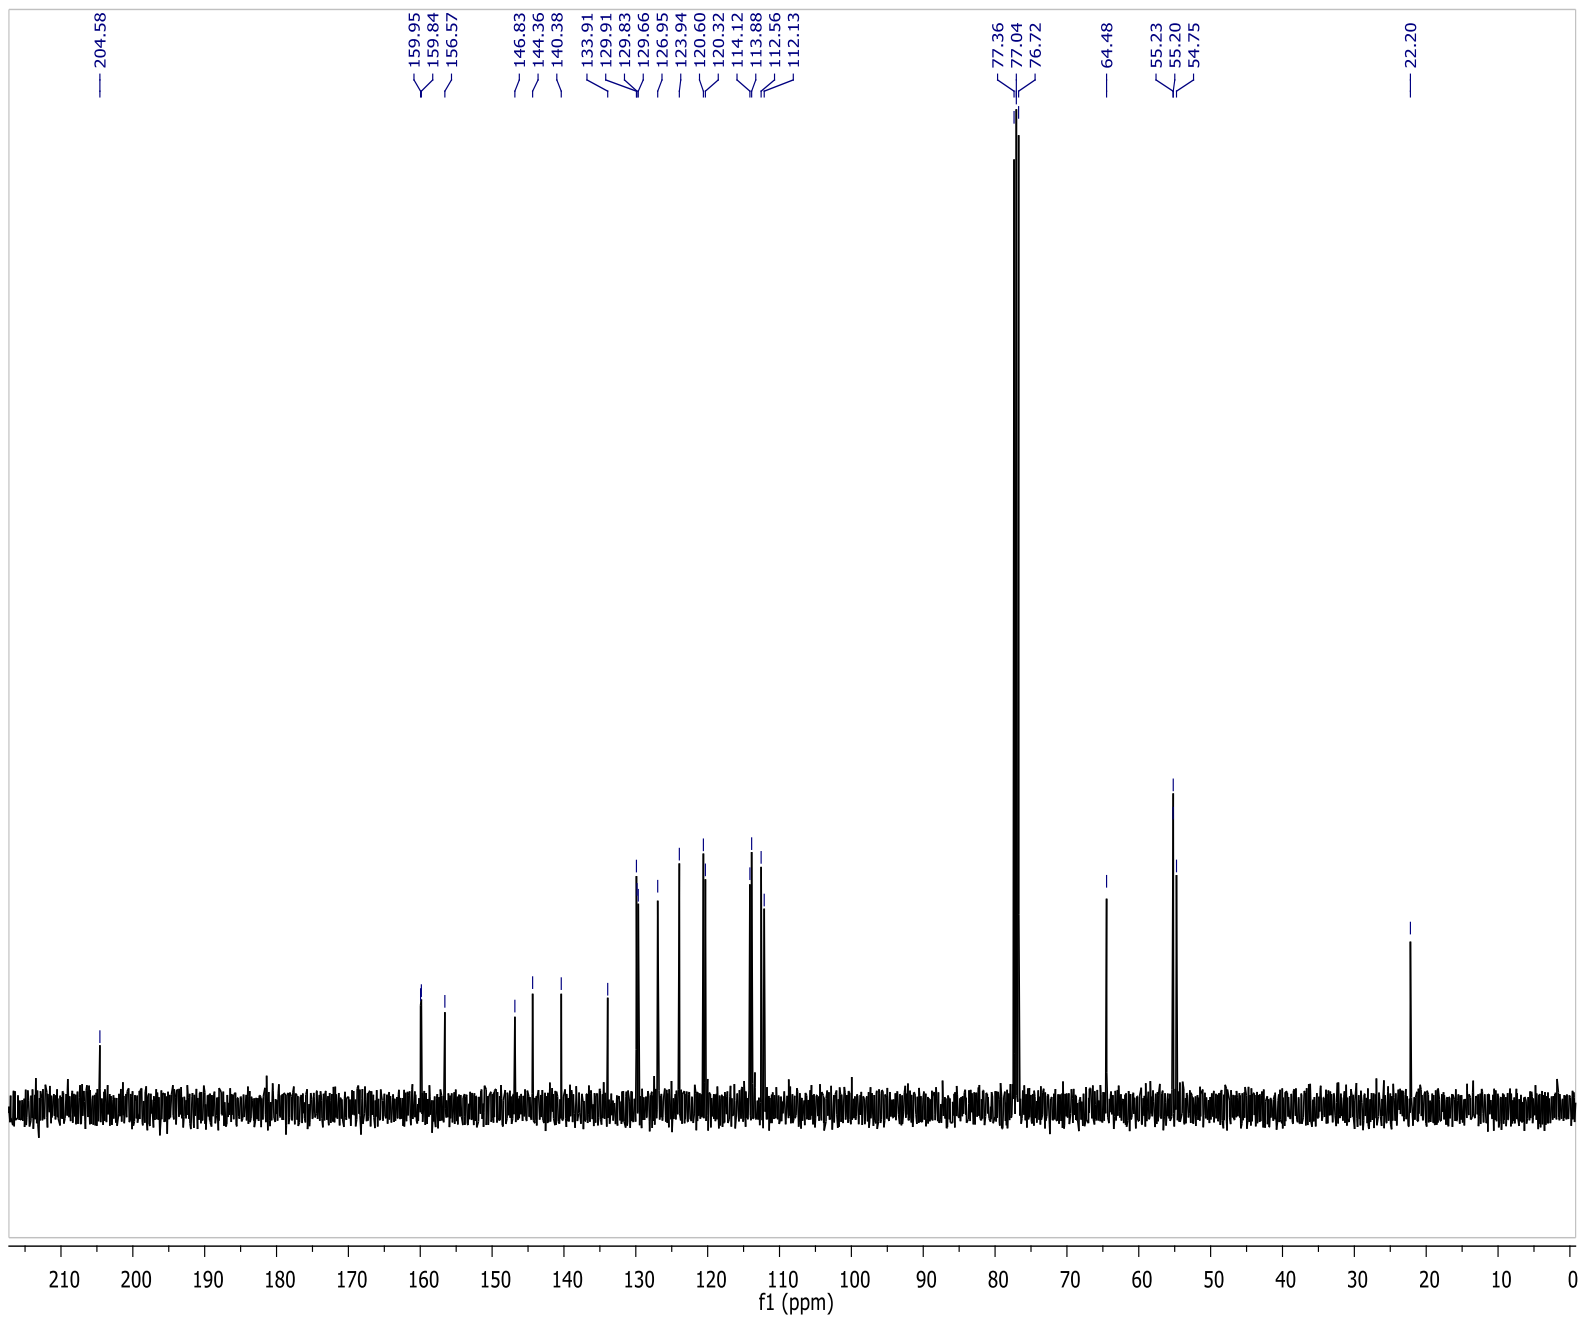

**$^1\text{H}$  (400 MHz) and  $^{13}\text{C}$  (100 MHz) NMR in  $\text{CDCl}_3$  of Compound **1g****

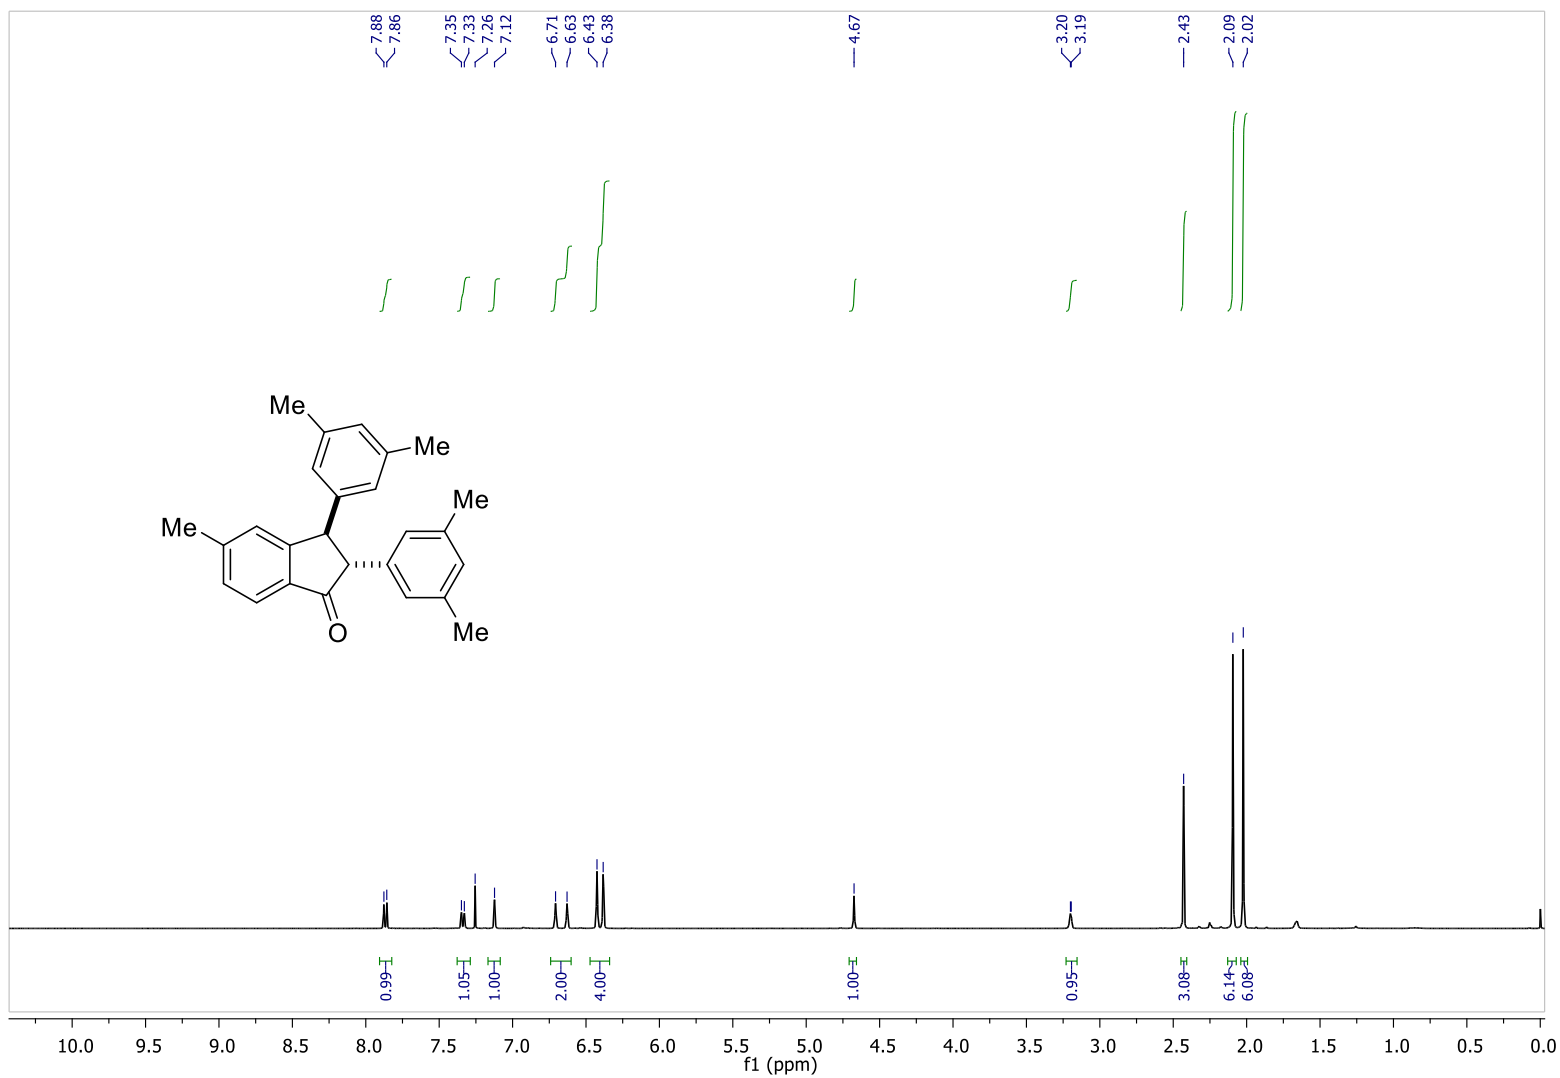

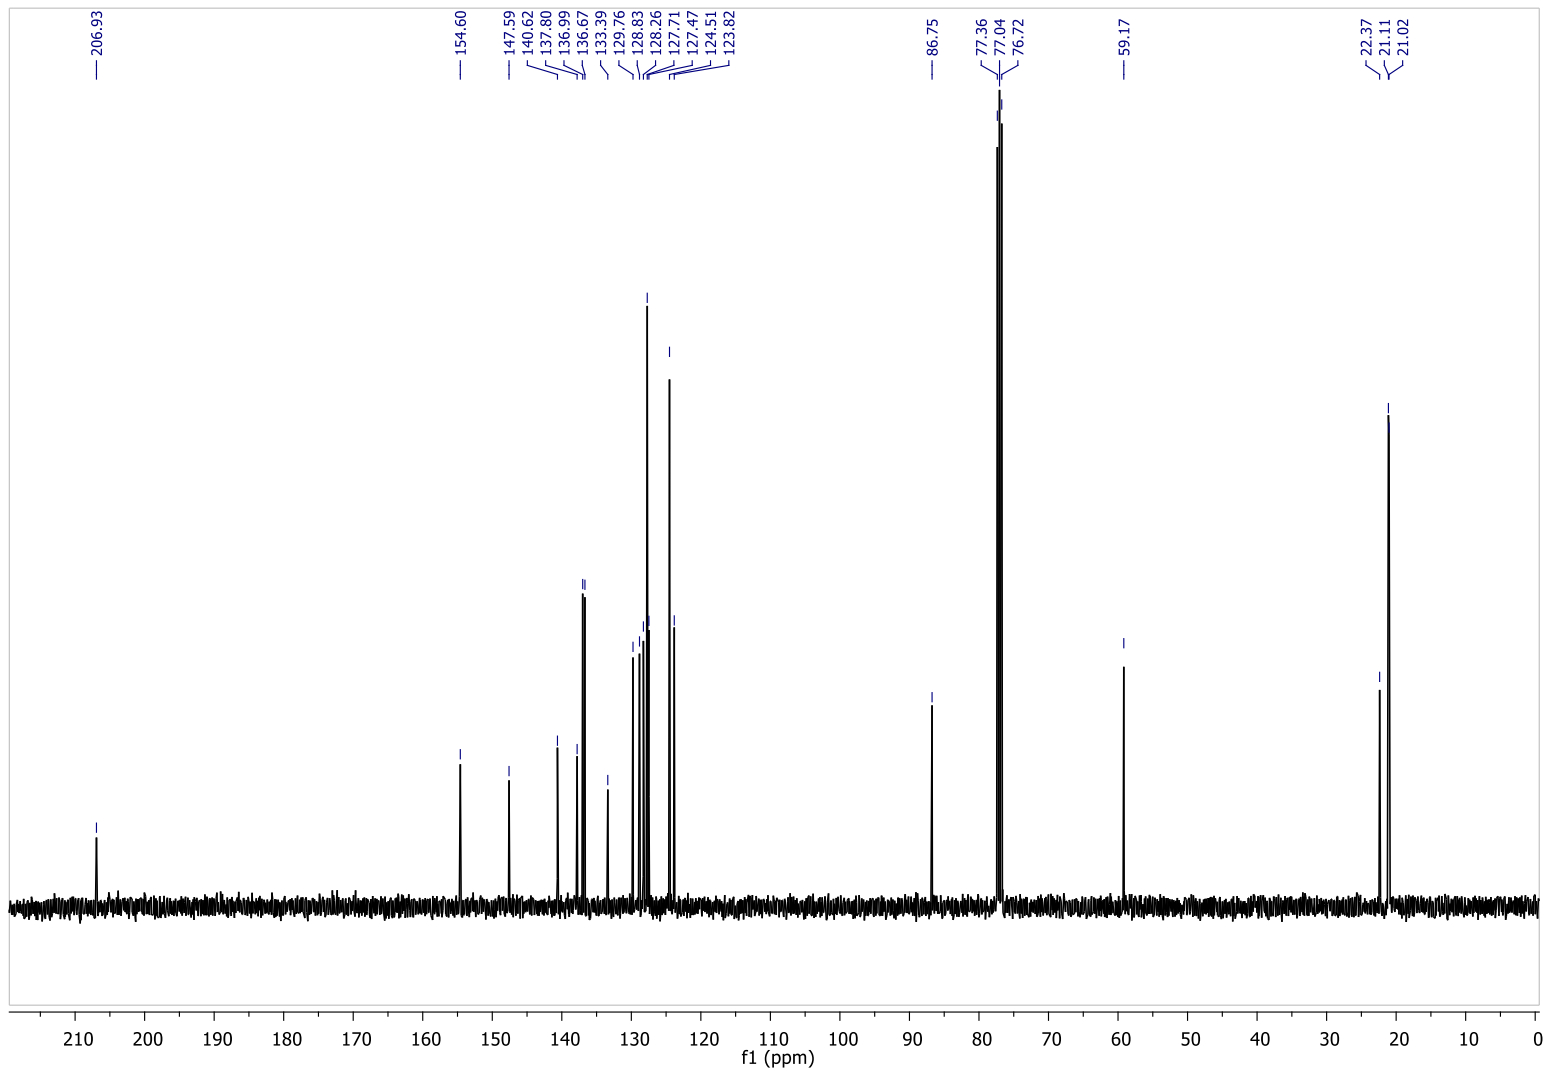

**<sup>1</sup>H (400 MHz) and <sup>13</sup>C (100 MHz) NMR in CDCl<sub>3</sub> of Compound 1h**

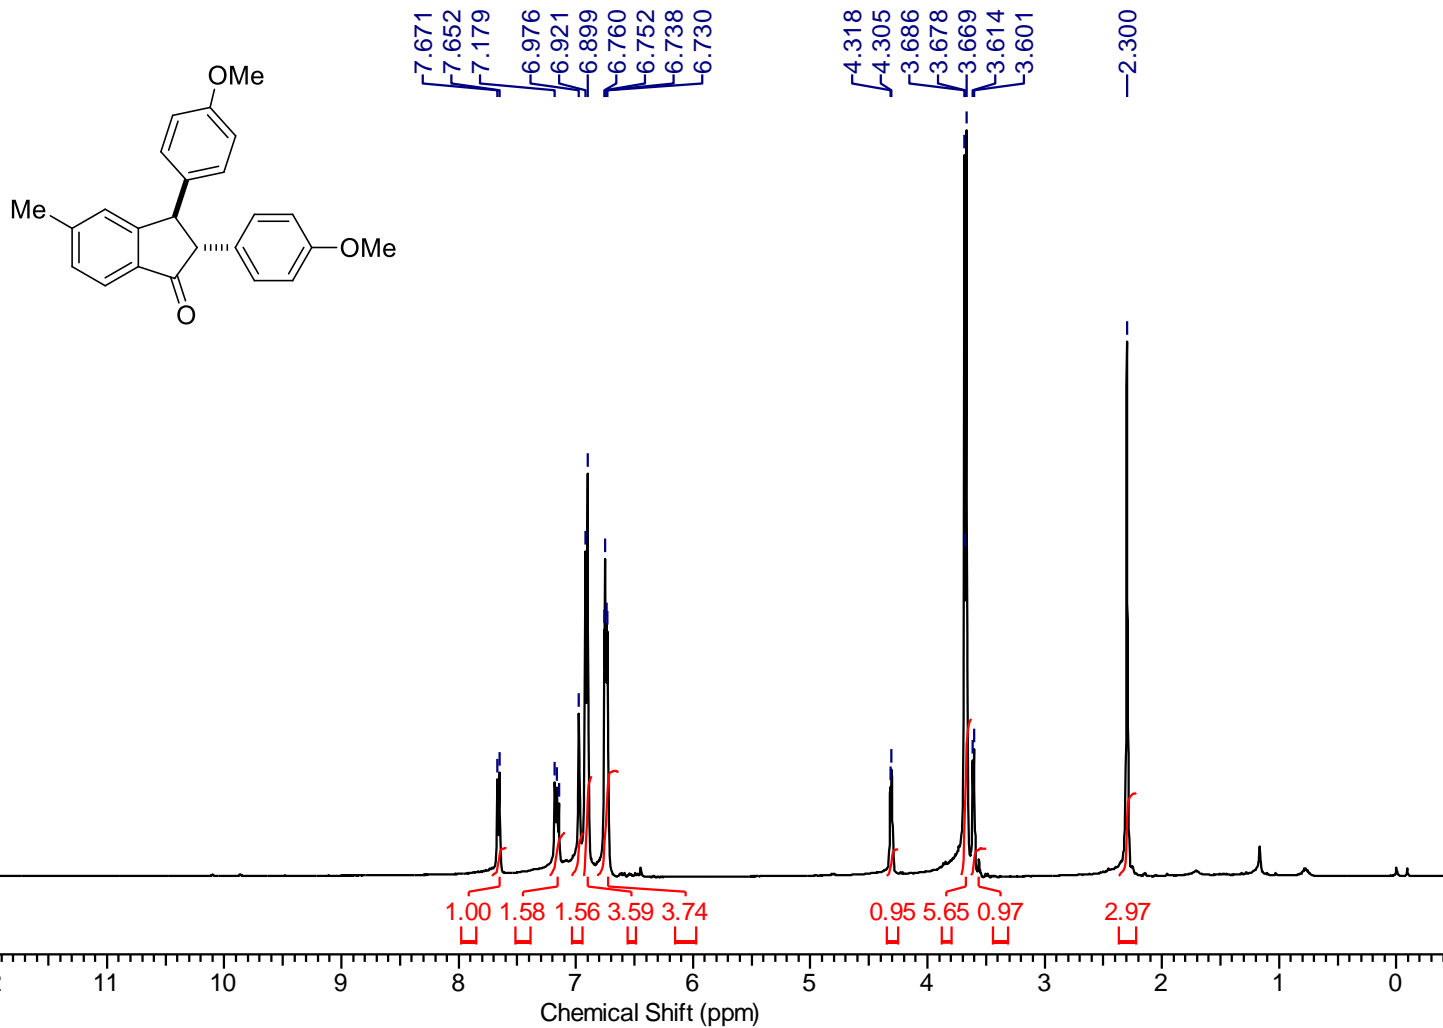



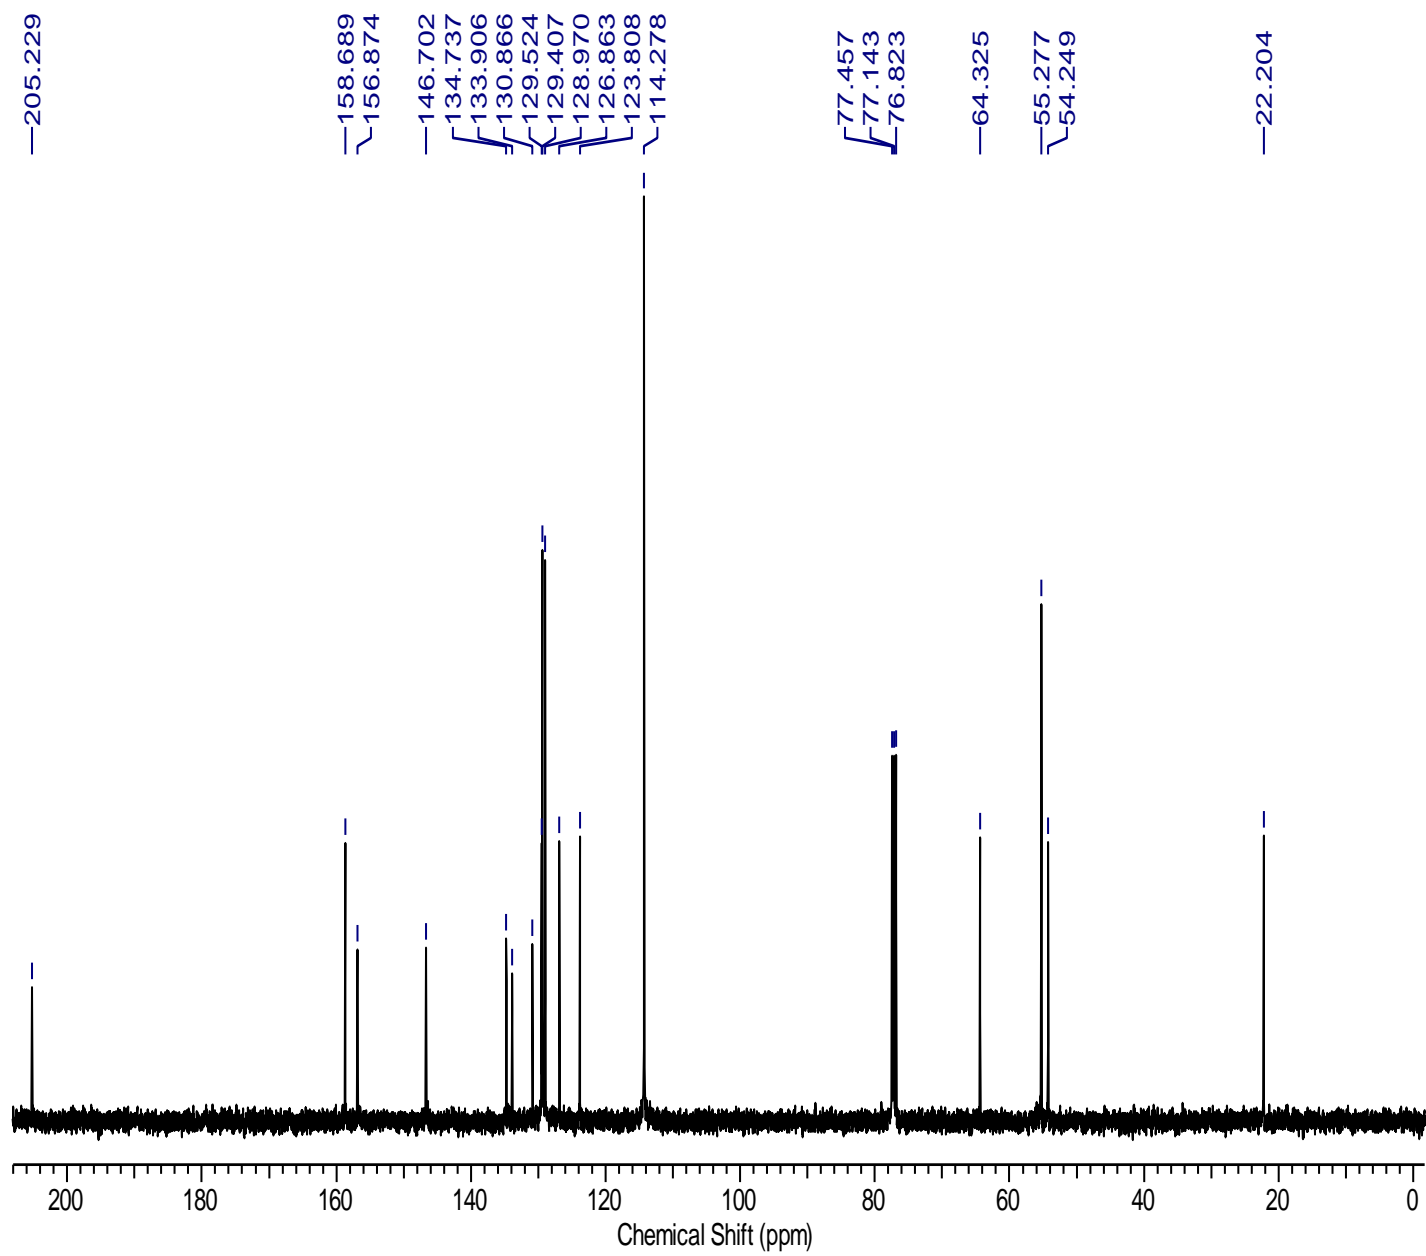

**<sup>1</sup>H (400 MHz) and <sup>13</sup>C (100 MHz) NMR in CDCl<sub>3</sub> of Compound 1i**

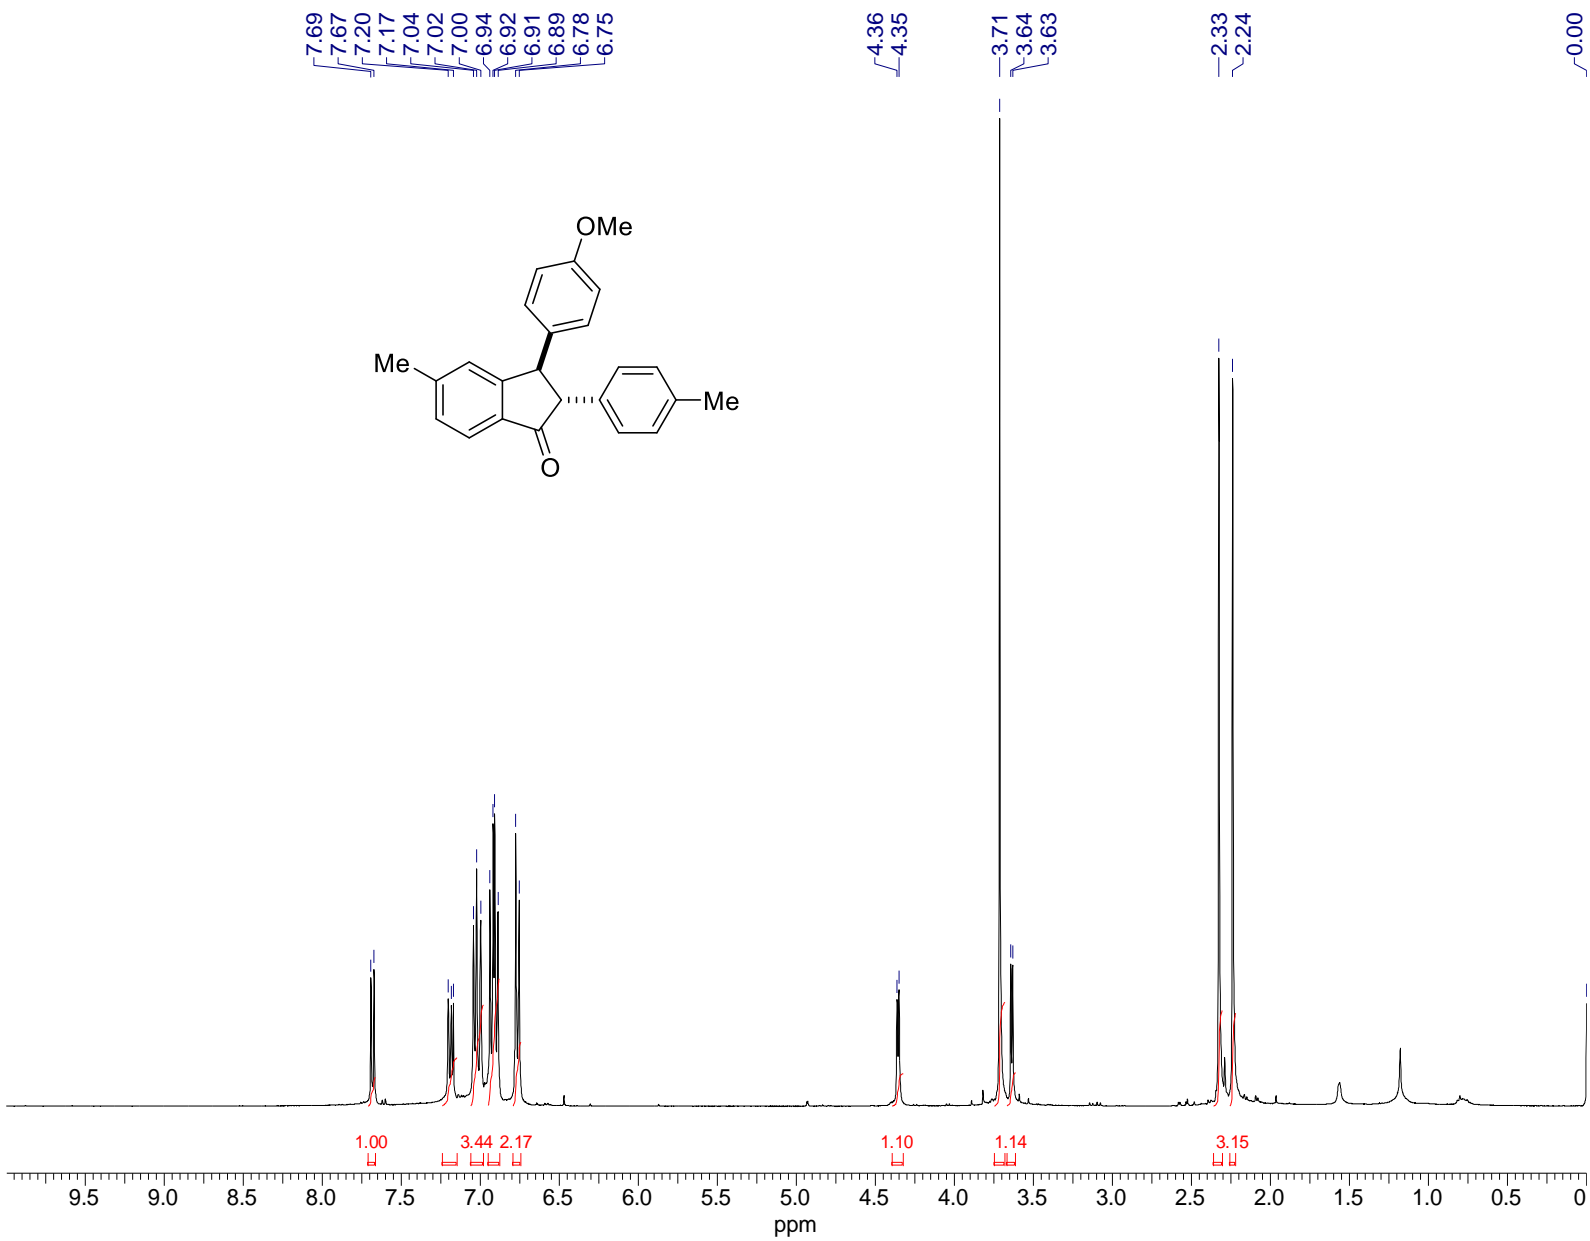

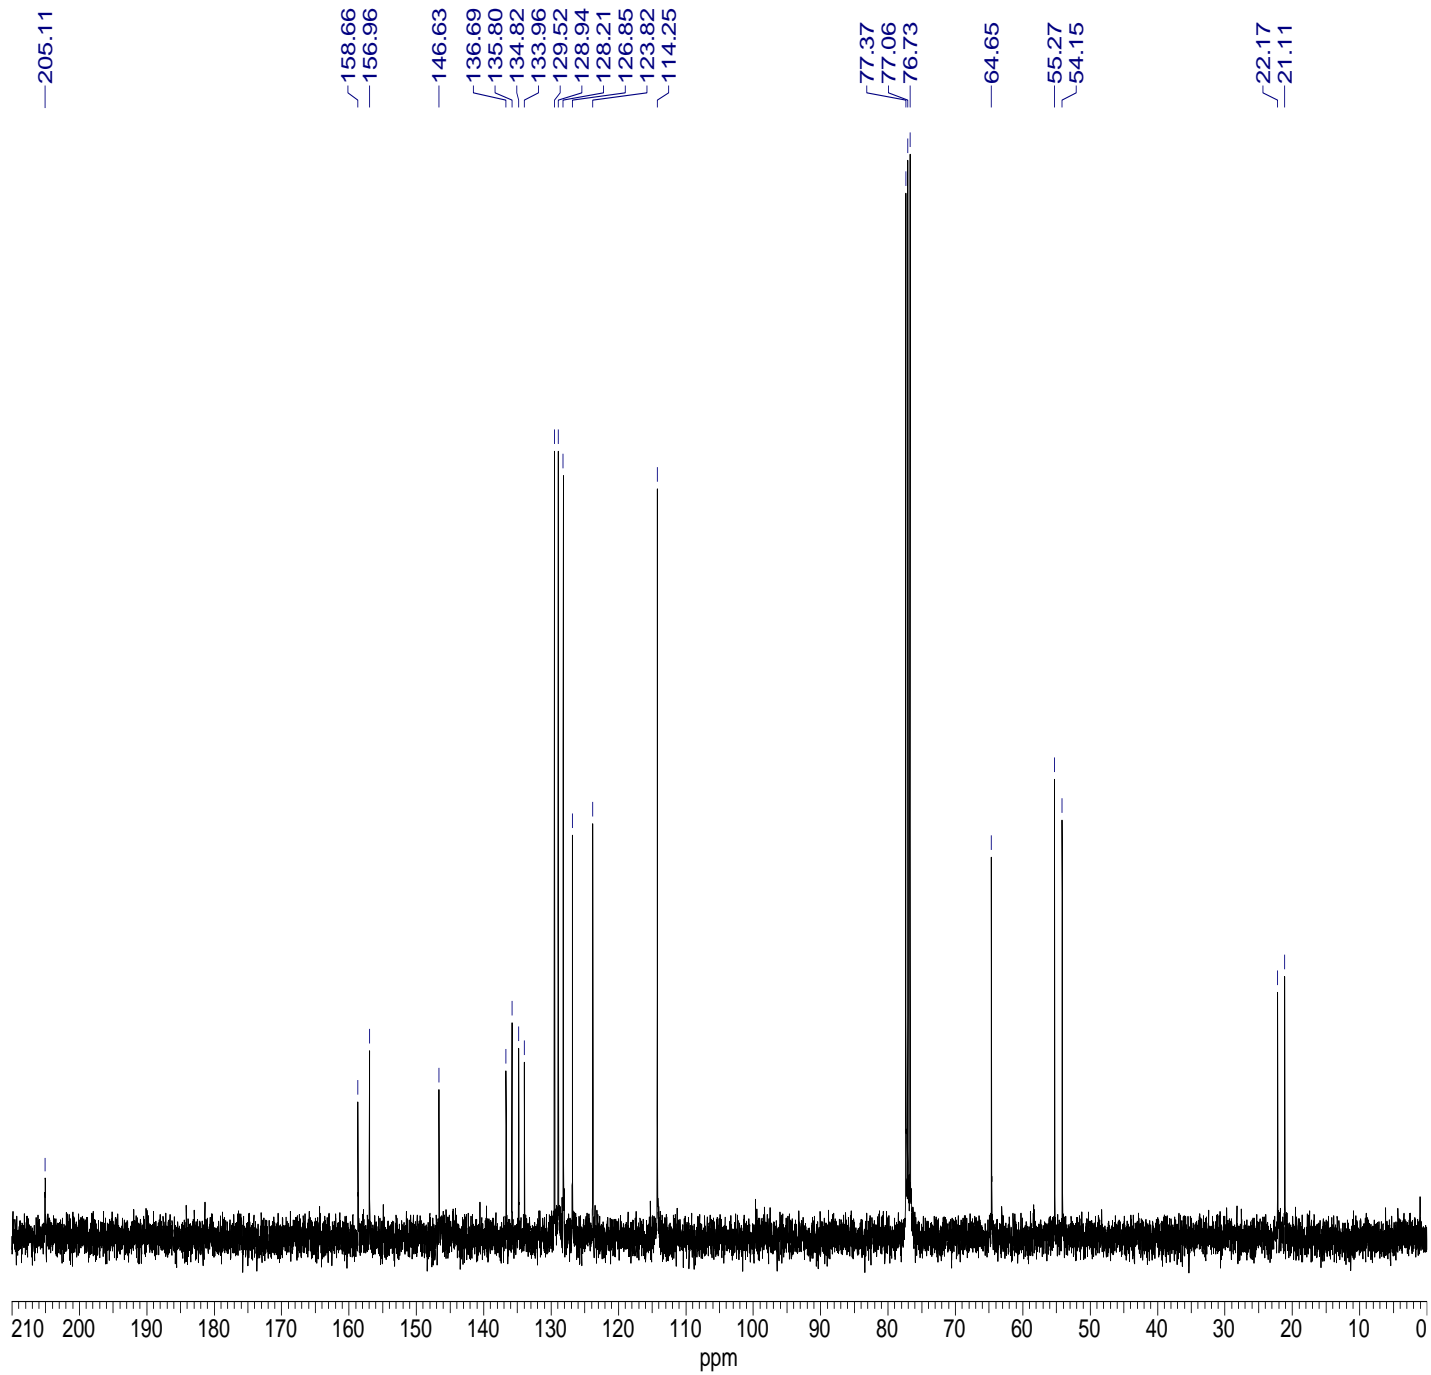

**$^1\text{H}$  (600 MHz) and  $^{13}\text{C}$  (151 MHz) NMR in  $\text{CDCl}_3$  of Compound 1o**

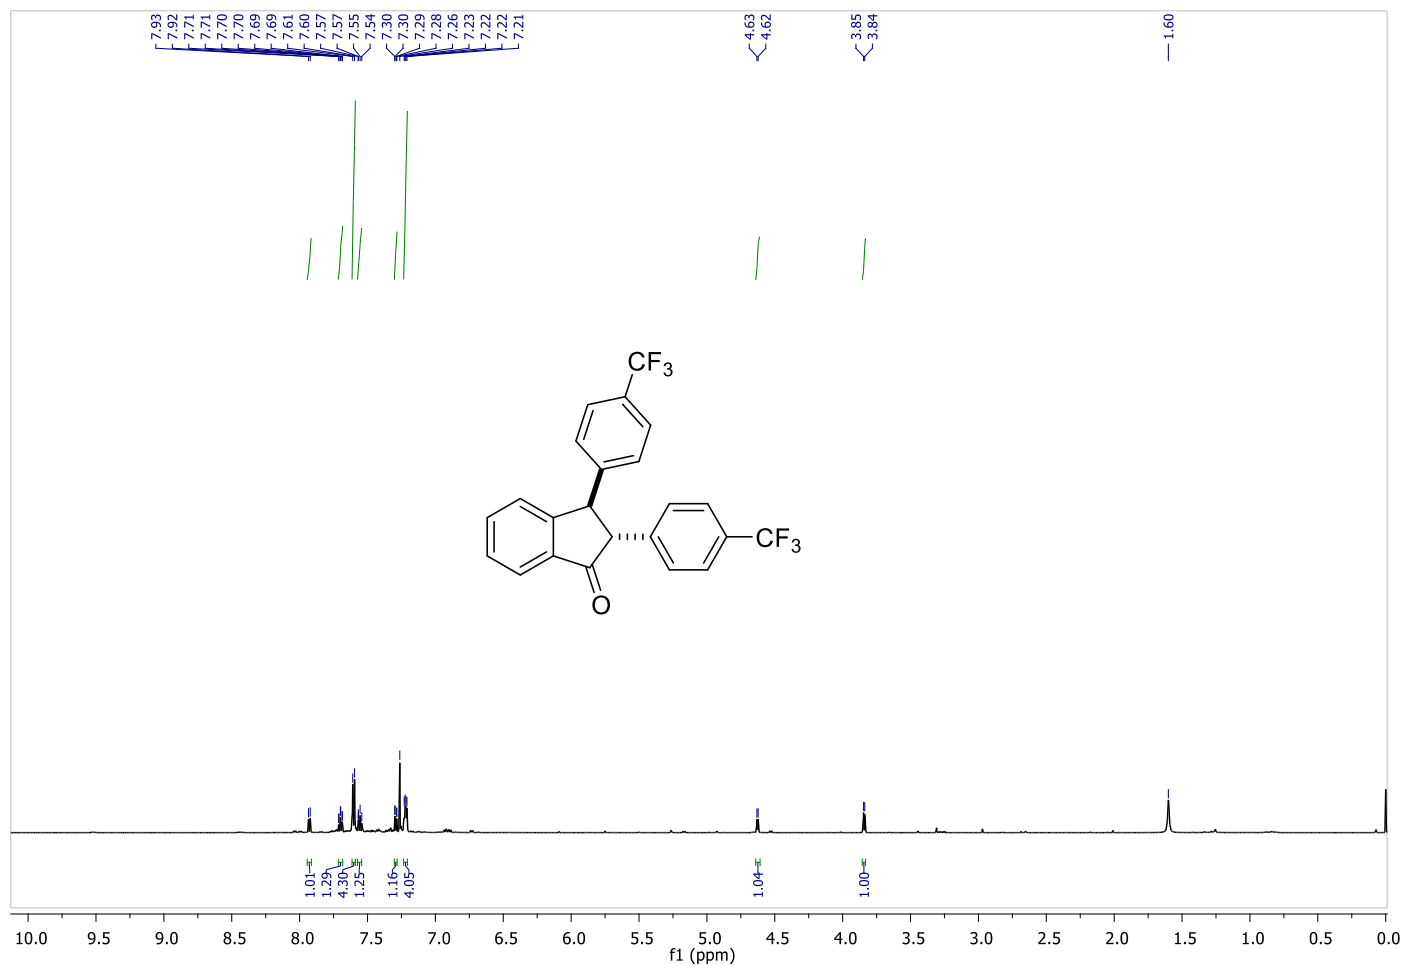

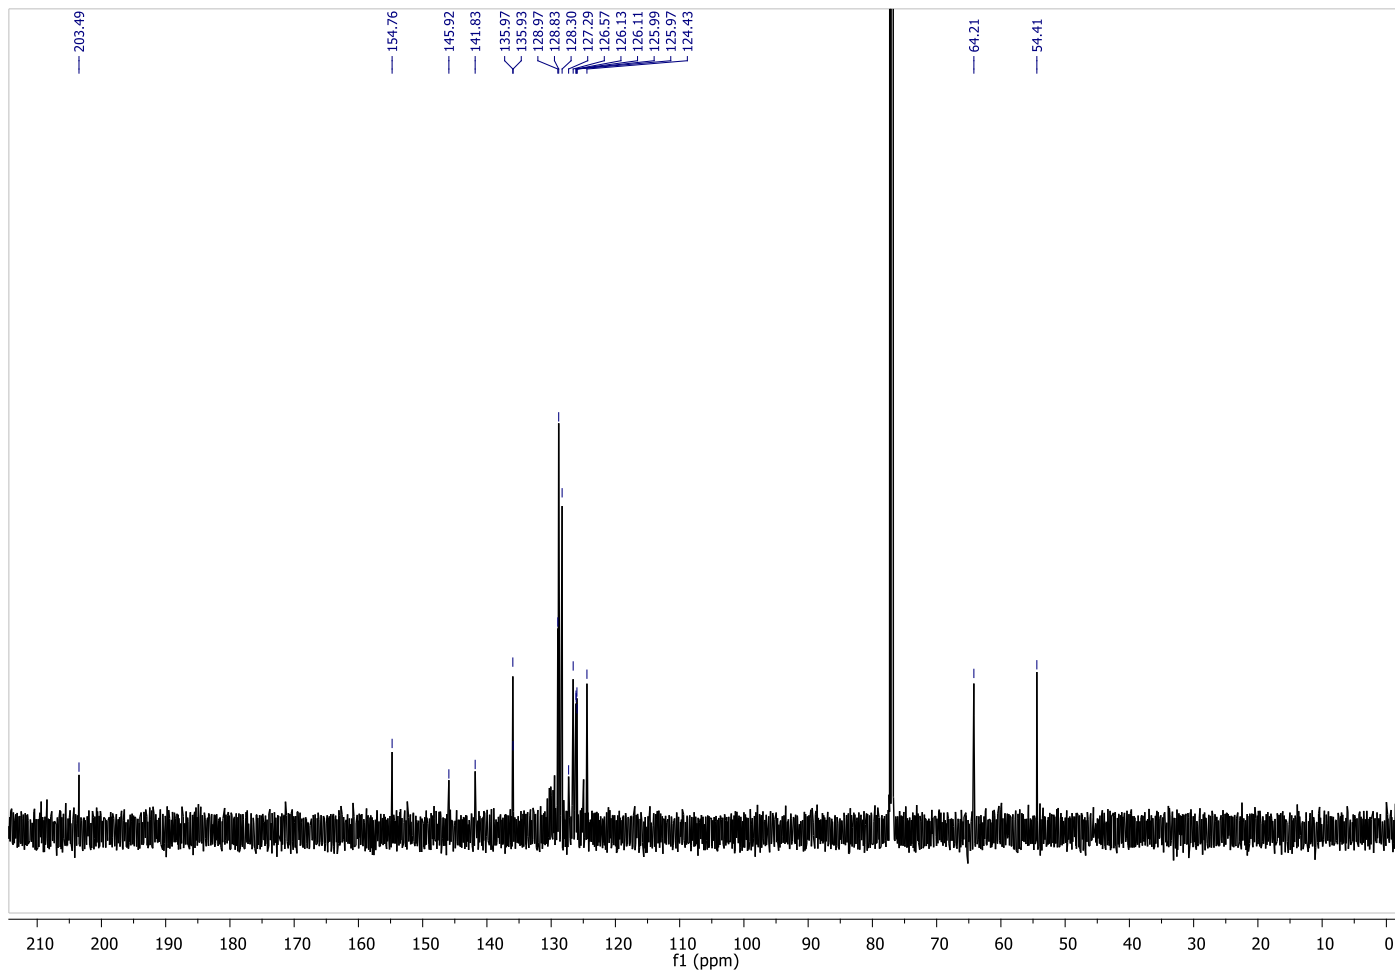

**<sup>1</sup>H (400 MHz) and <sup>13</sup>C (100 MHz) NMR in CDCl<sub>3</sub> of Compound 4a**

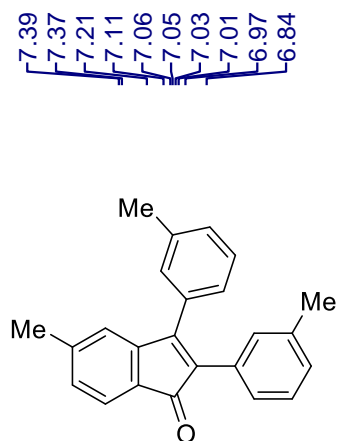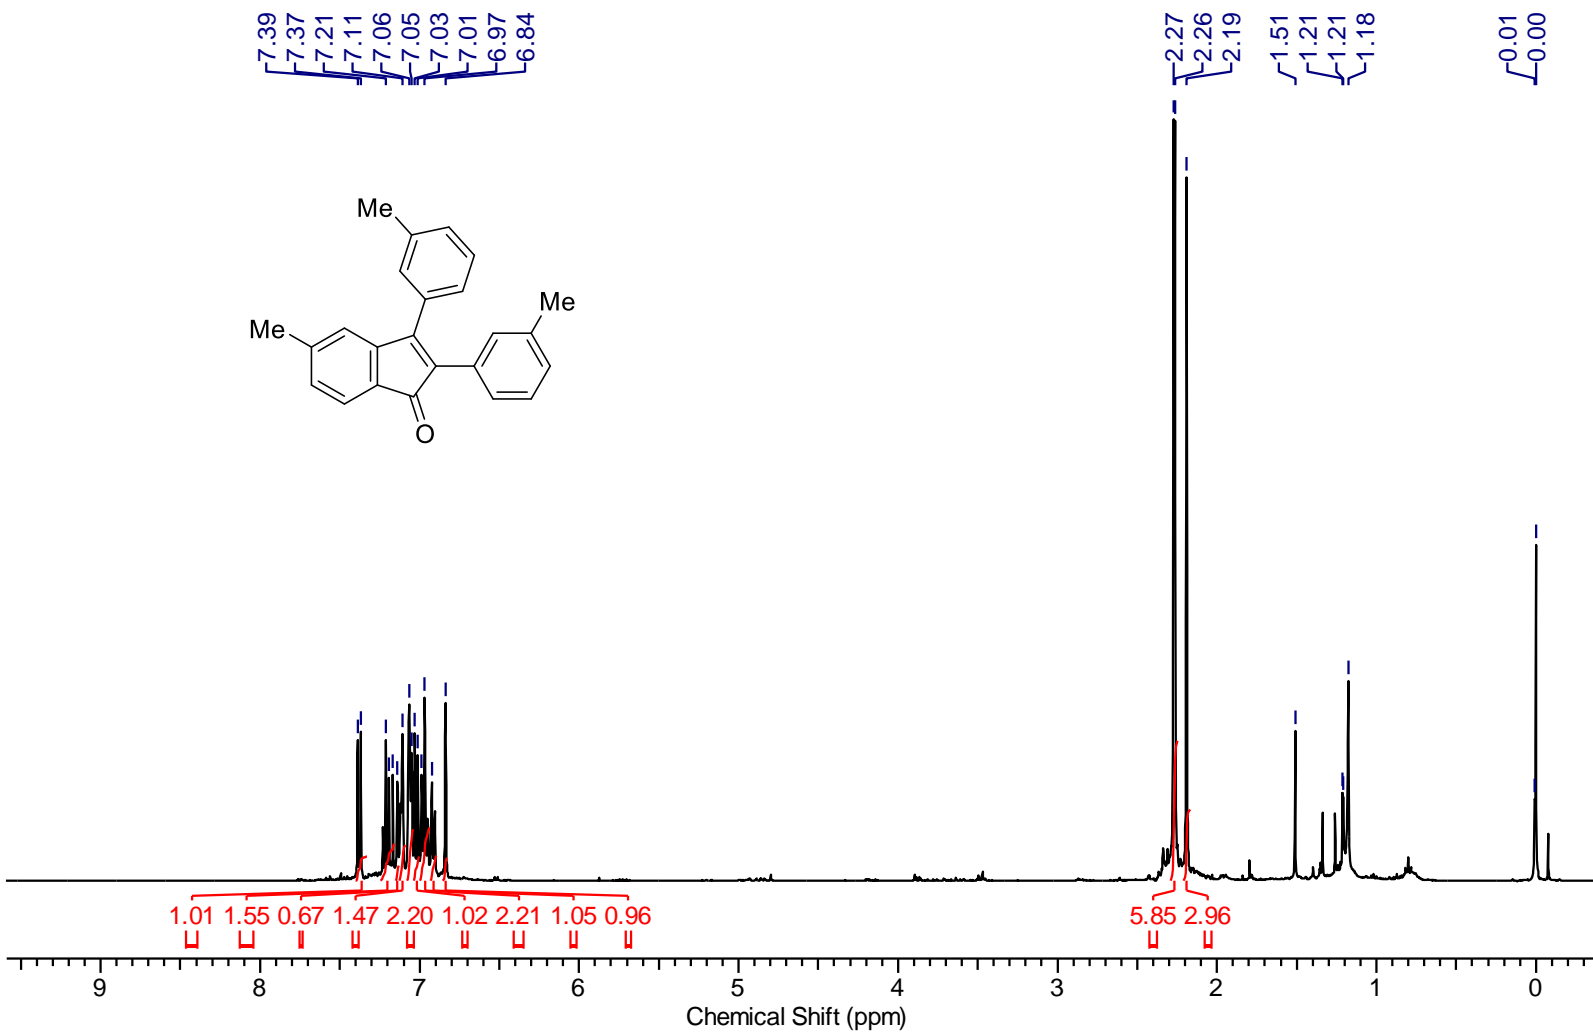

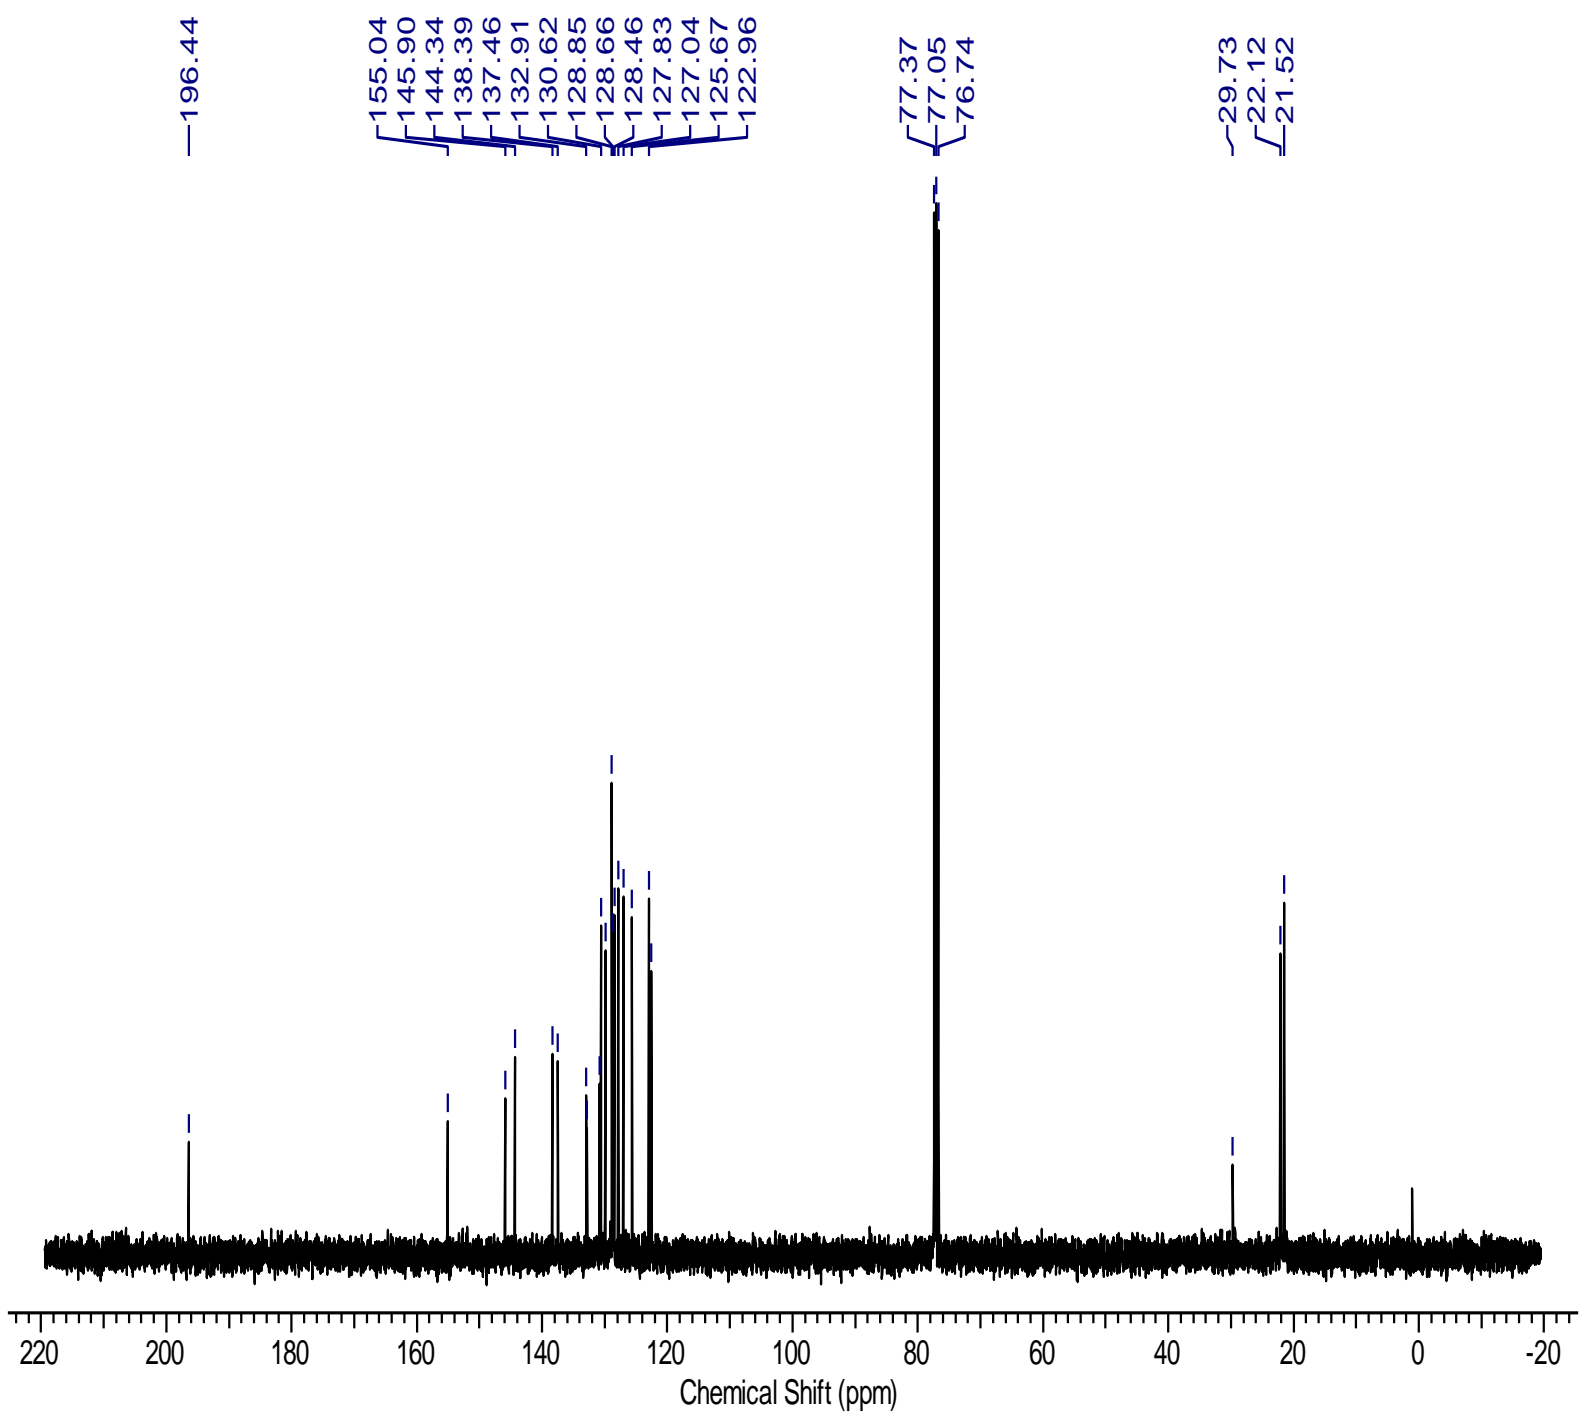

**$^1\text{H}$  (400 MHz) and  $^{13}\text{C}$  (100 MHz) NMR in  $\text{CDCl}_3$  of Compound 4e**

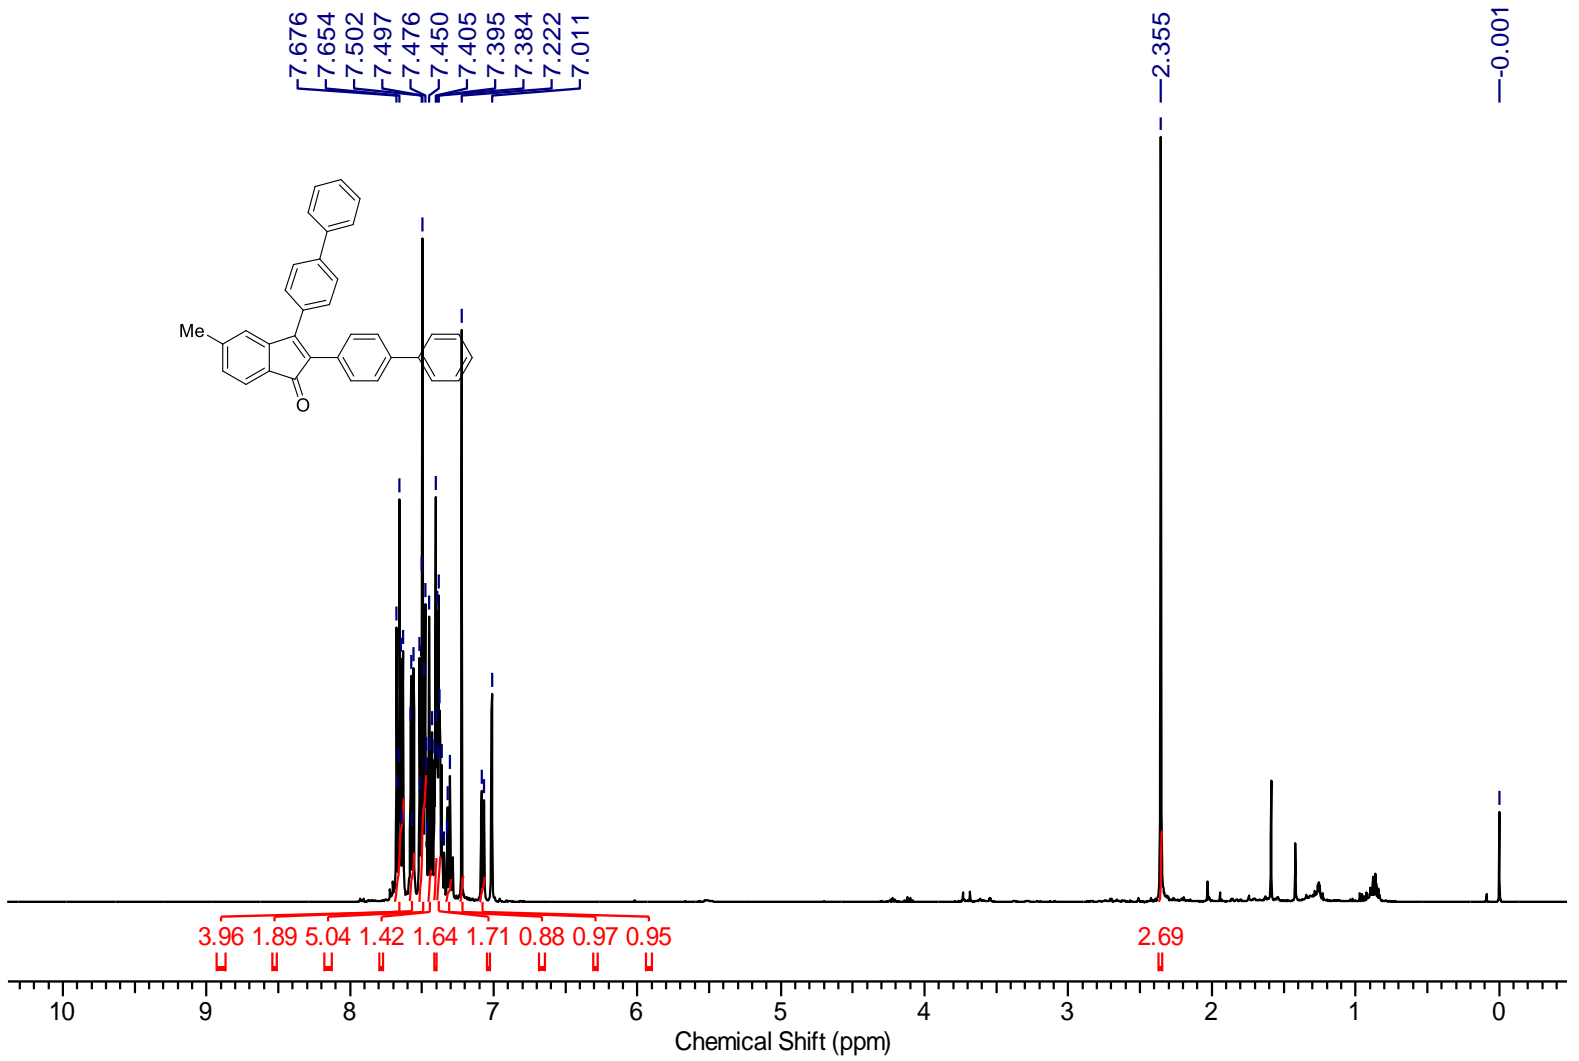



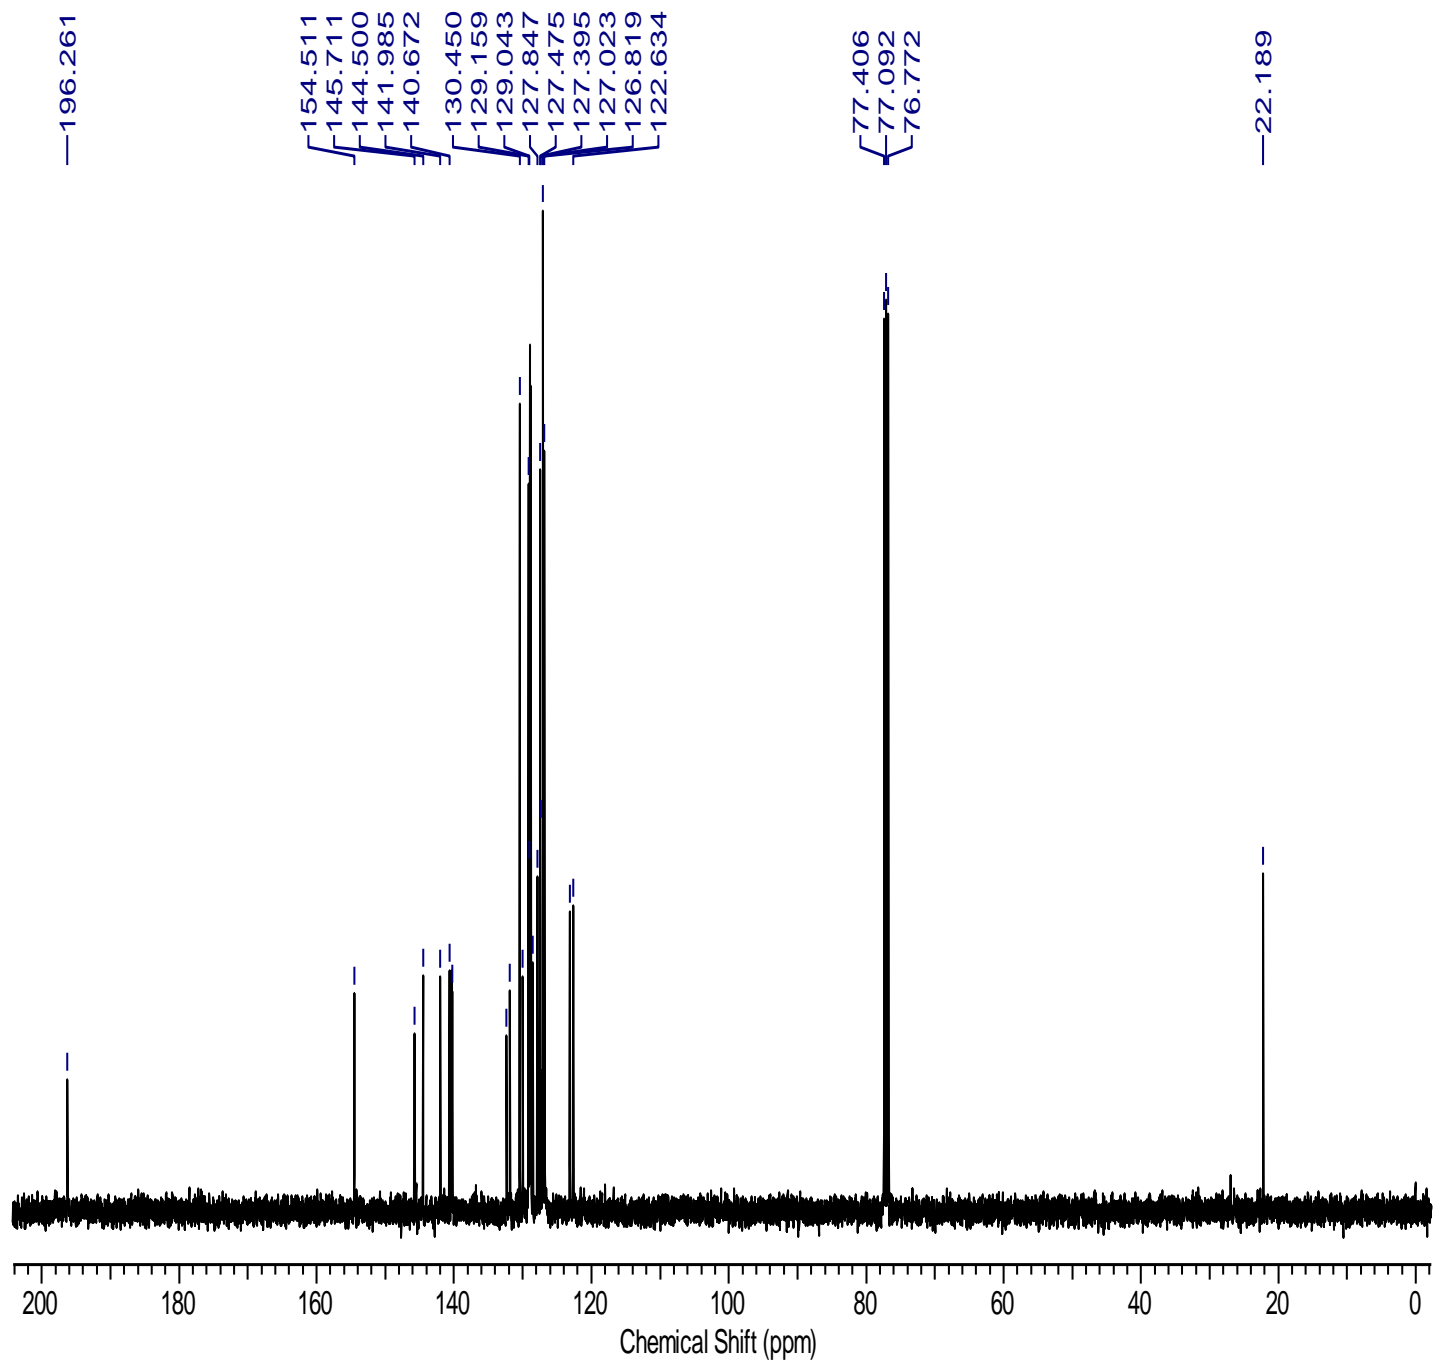

**<sup>1</sup>H (400 MHz) and <sup>13</sup>C (100 MHz) NMR in CDCl<sub>3</sub> of Compound 4g**

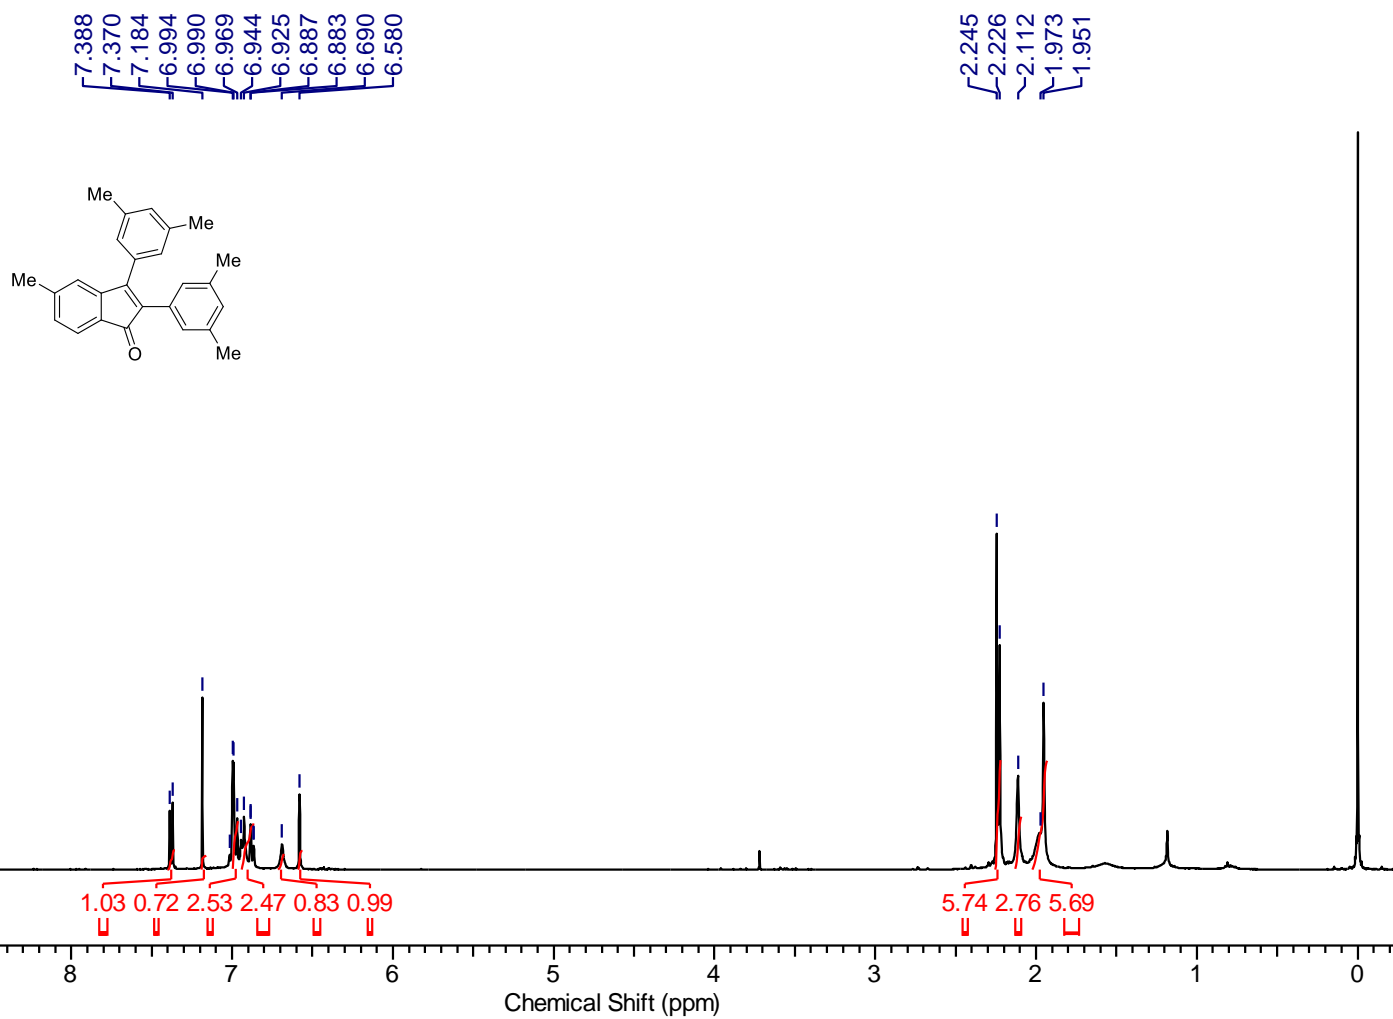

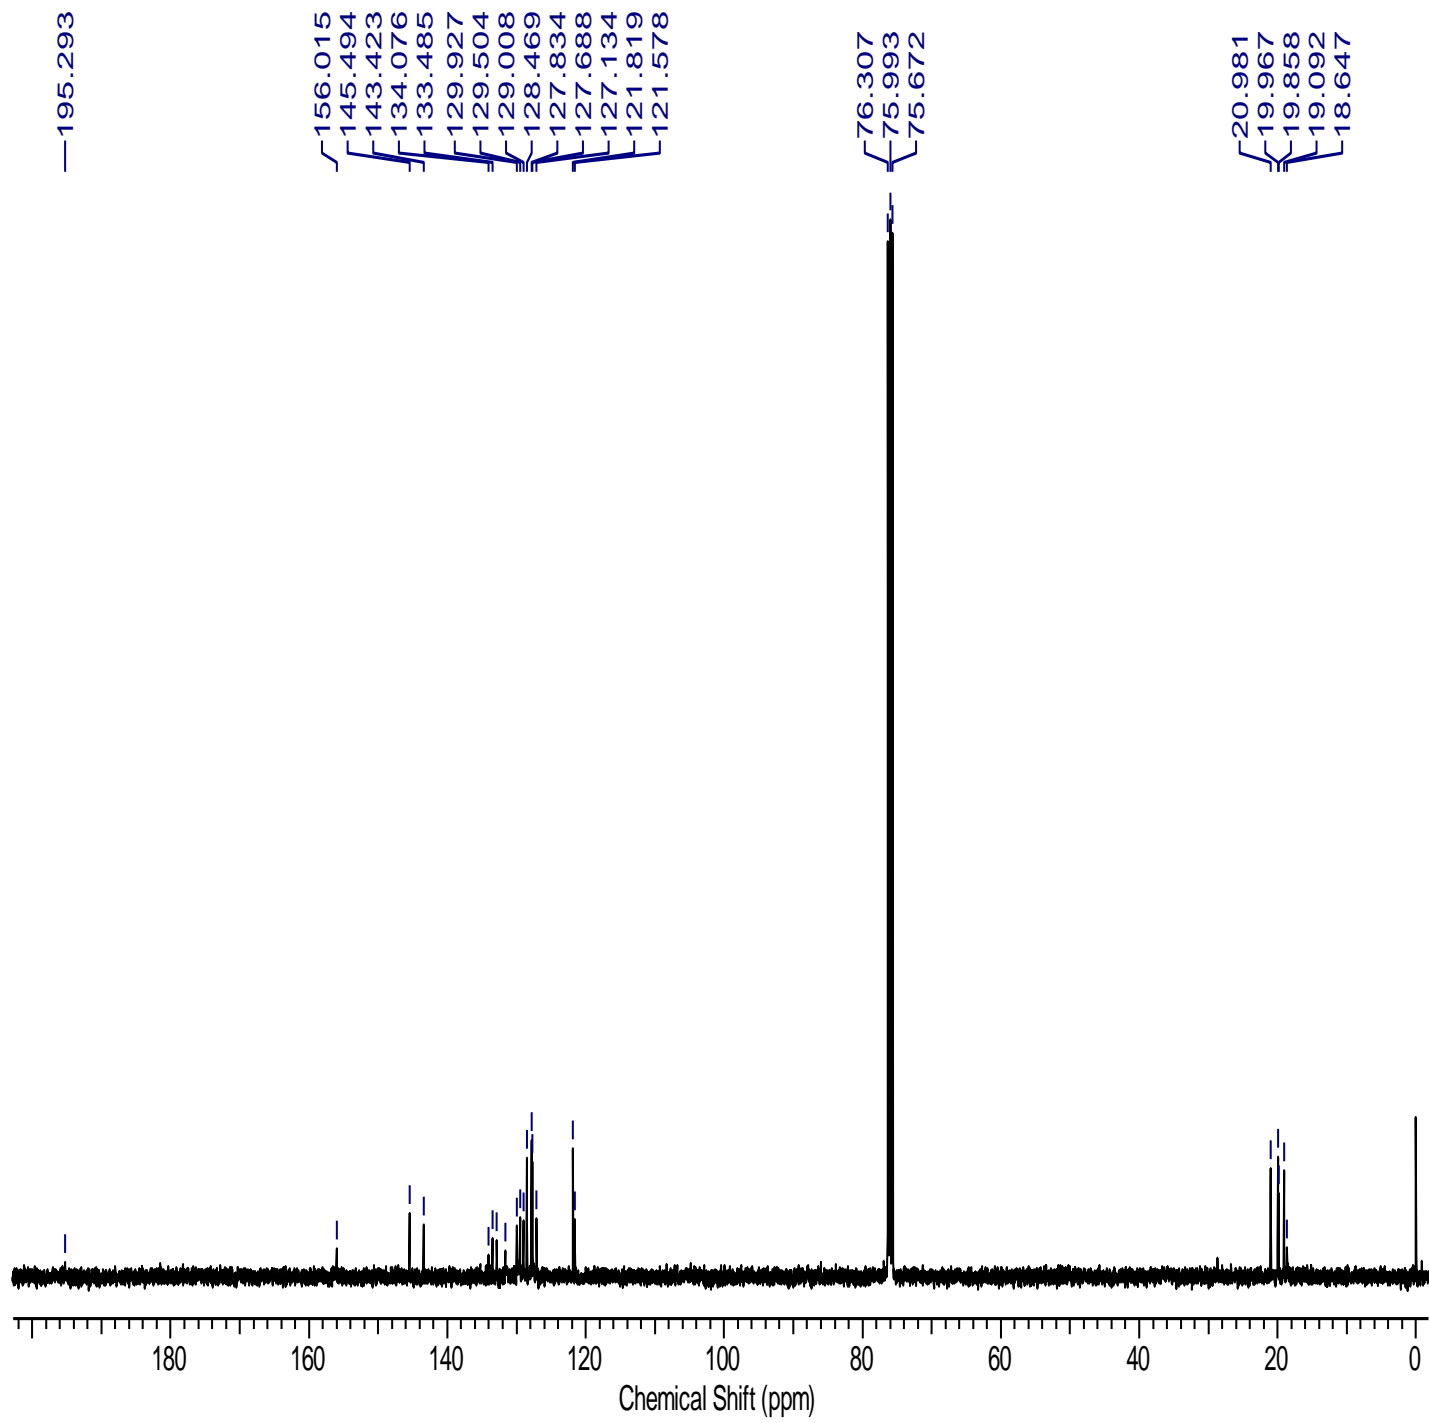

**$^1\text{H}$  (400 MHz) and  $^{13}\text{C}$  (100 MHz) NMR in  $\text{CDCl}_3$  of Compound 4i**

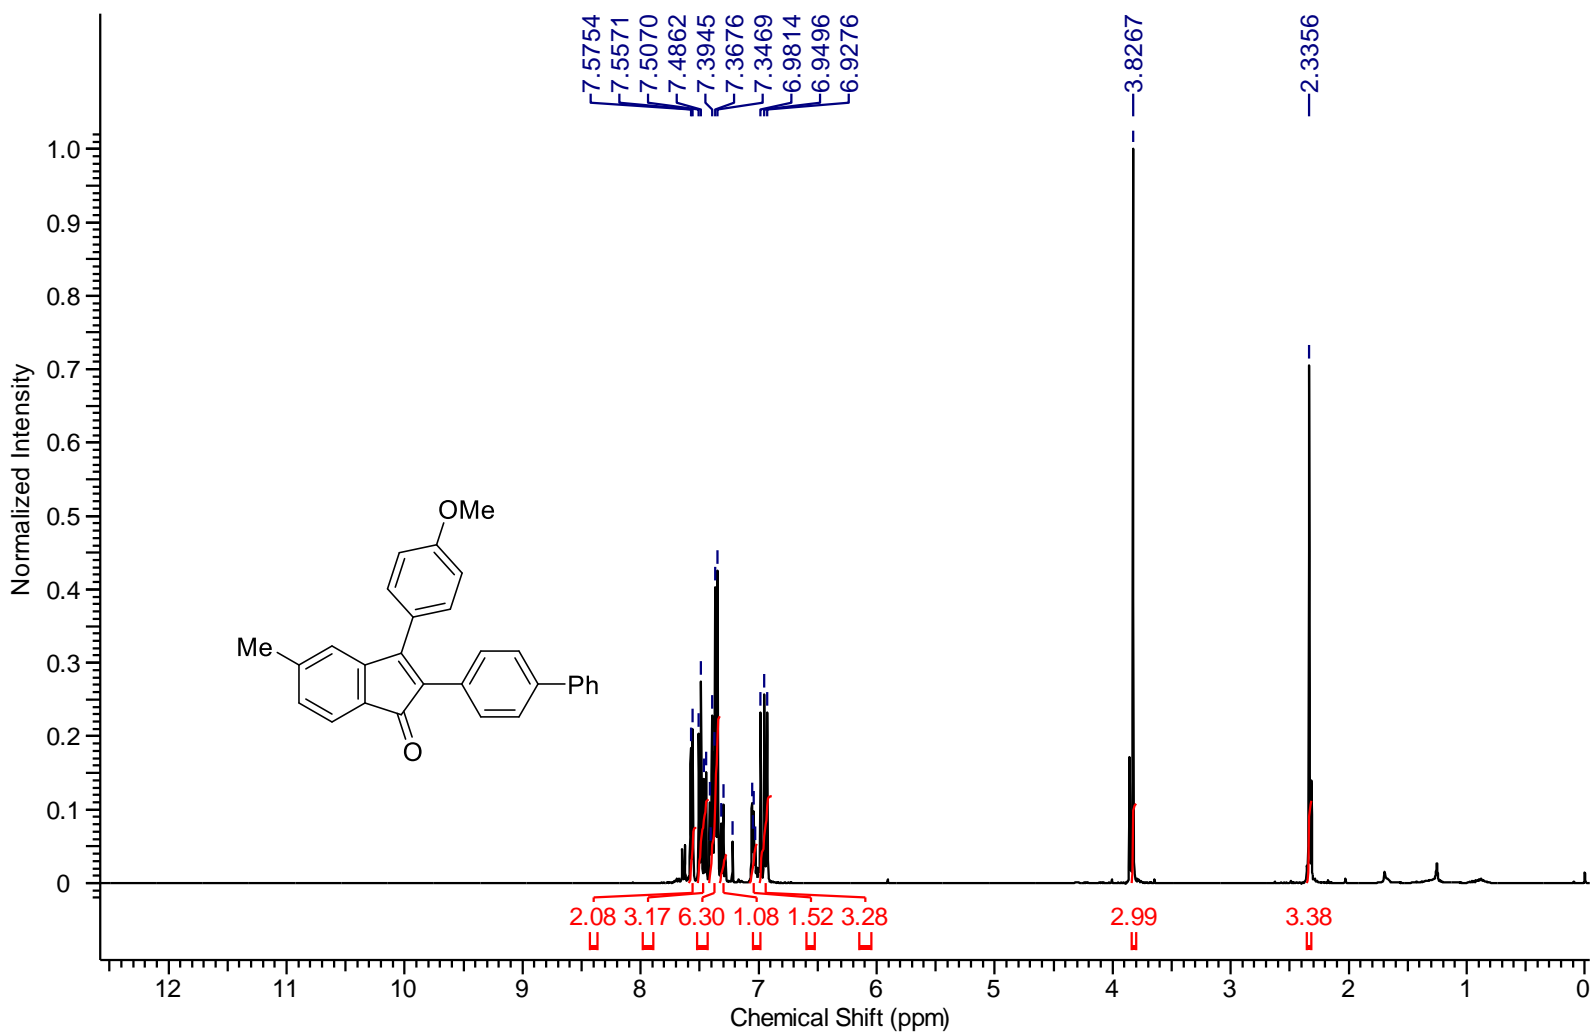

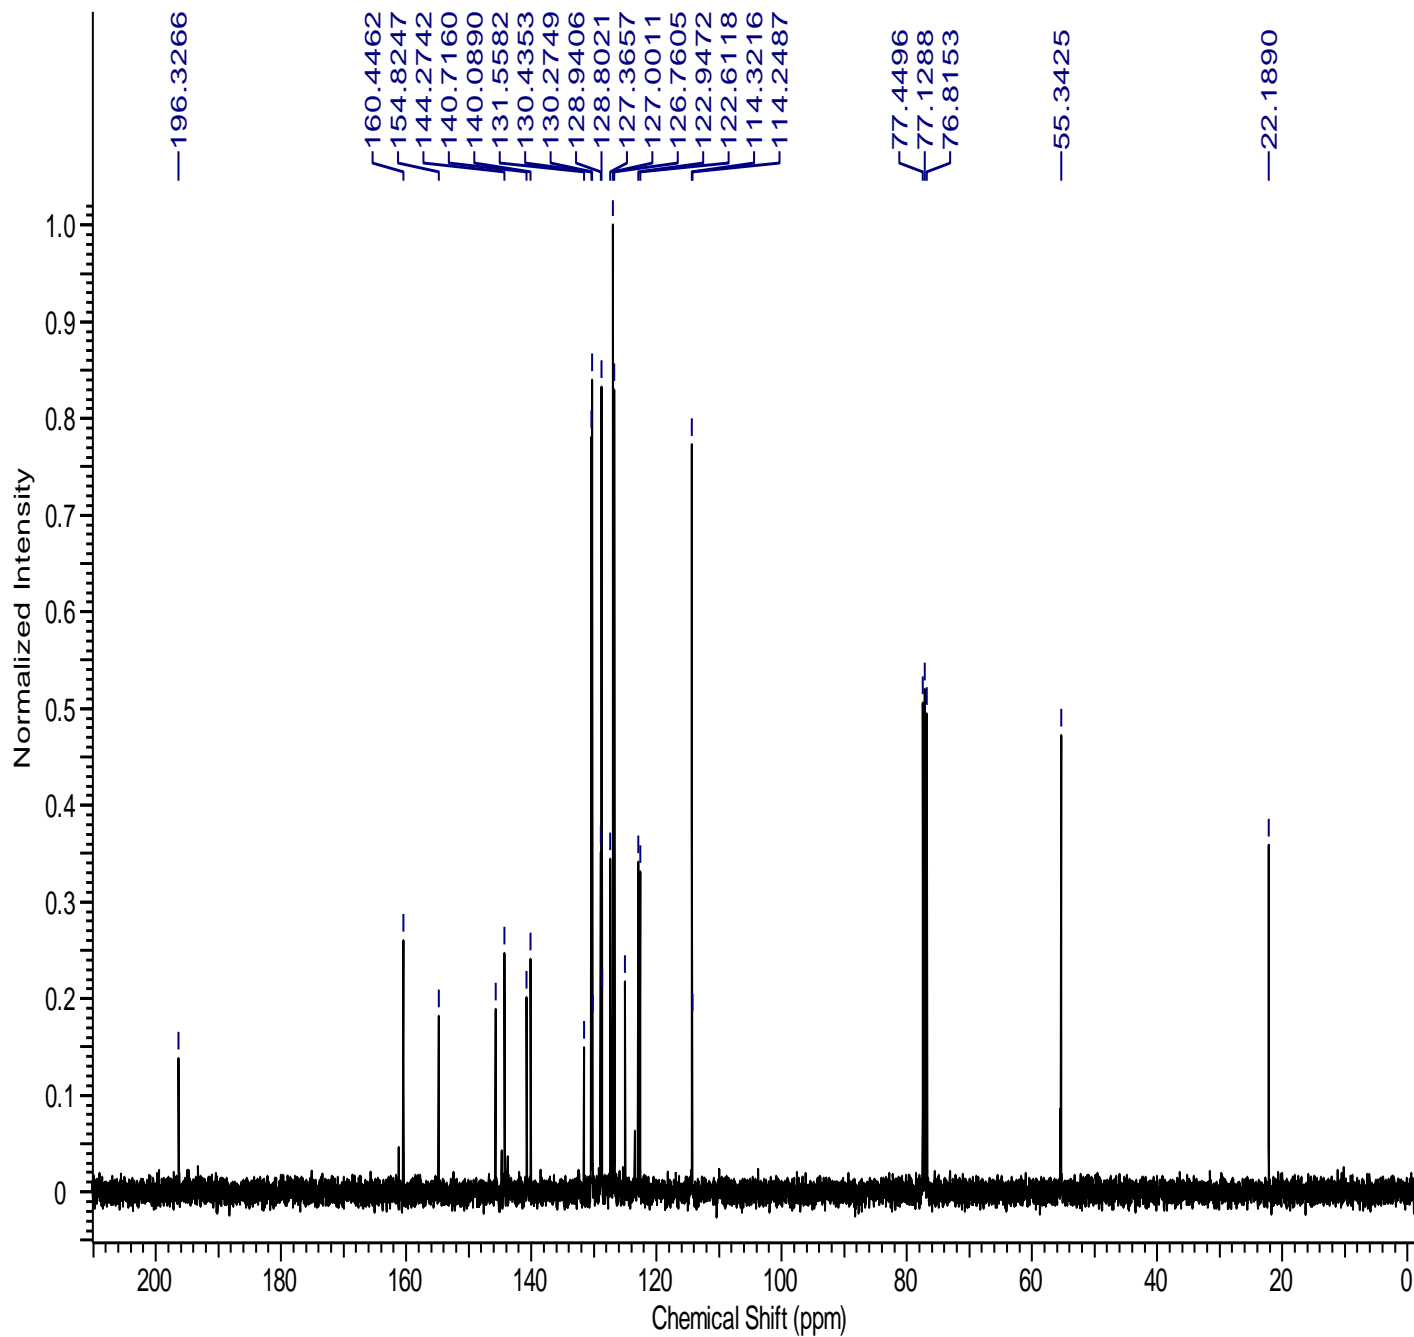

**<sup>1</sup>H (400 MHz) and <sup>13</sup>C (100 MHz) NMR in CDCl<sub>3</sub> of Compound 4j**

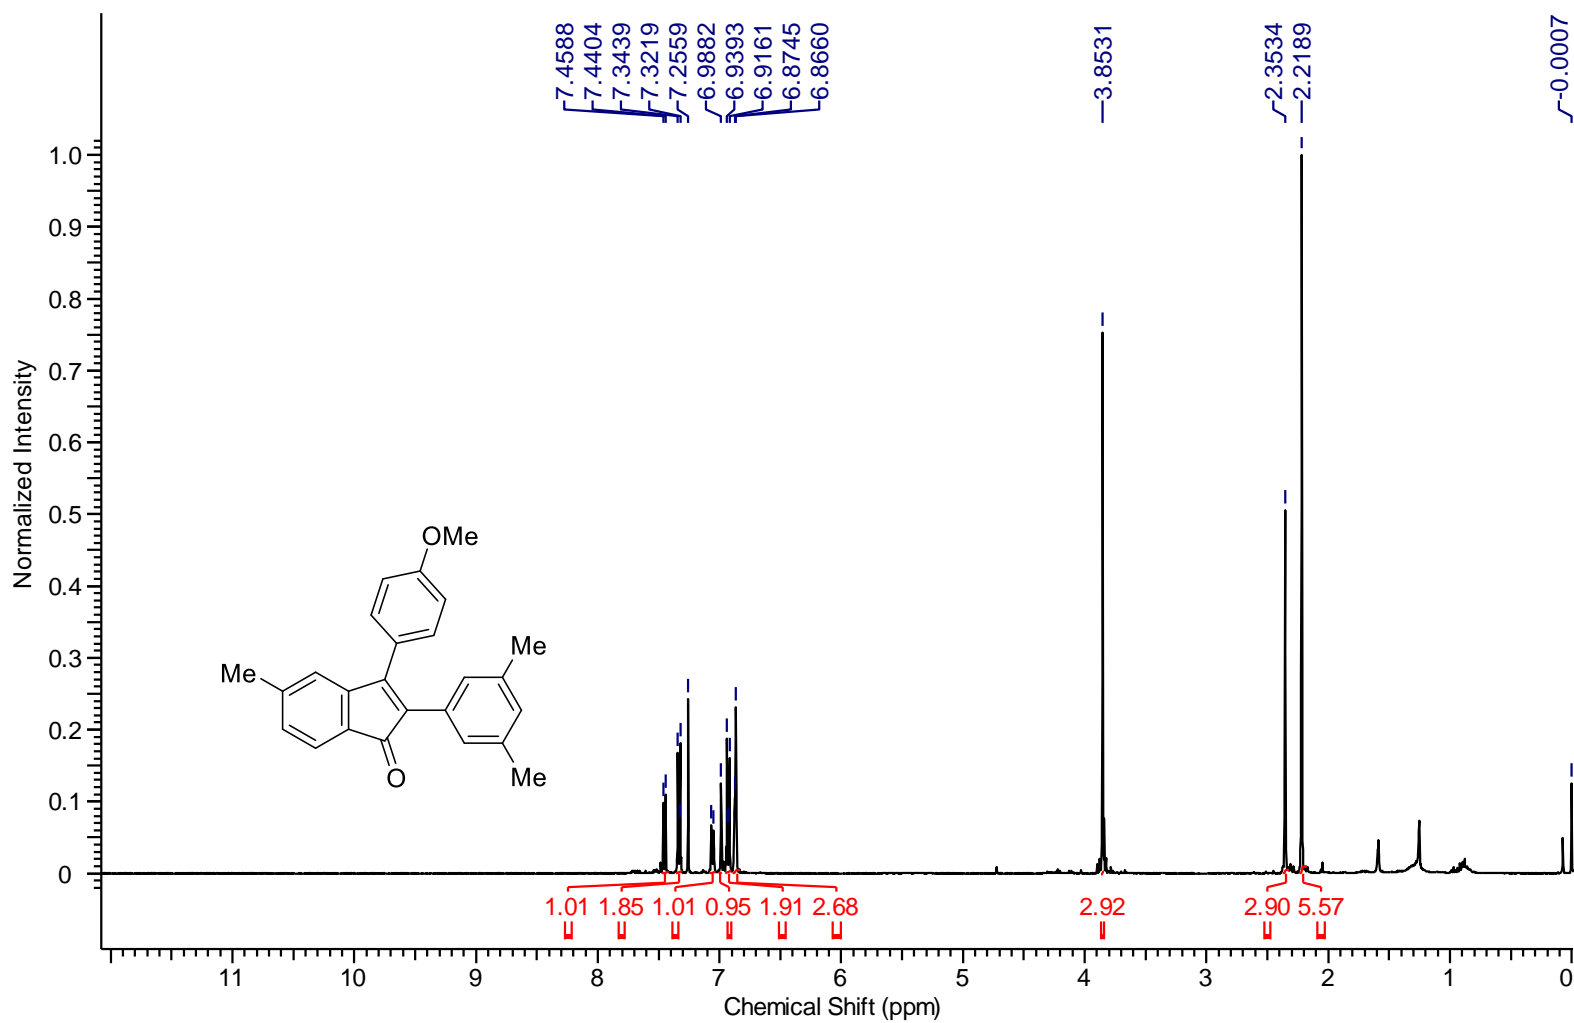

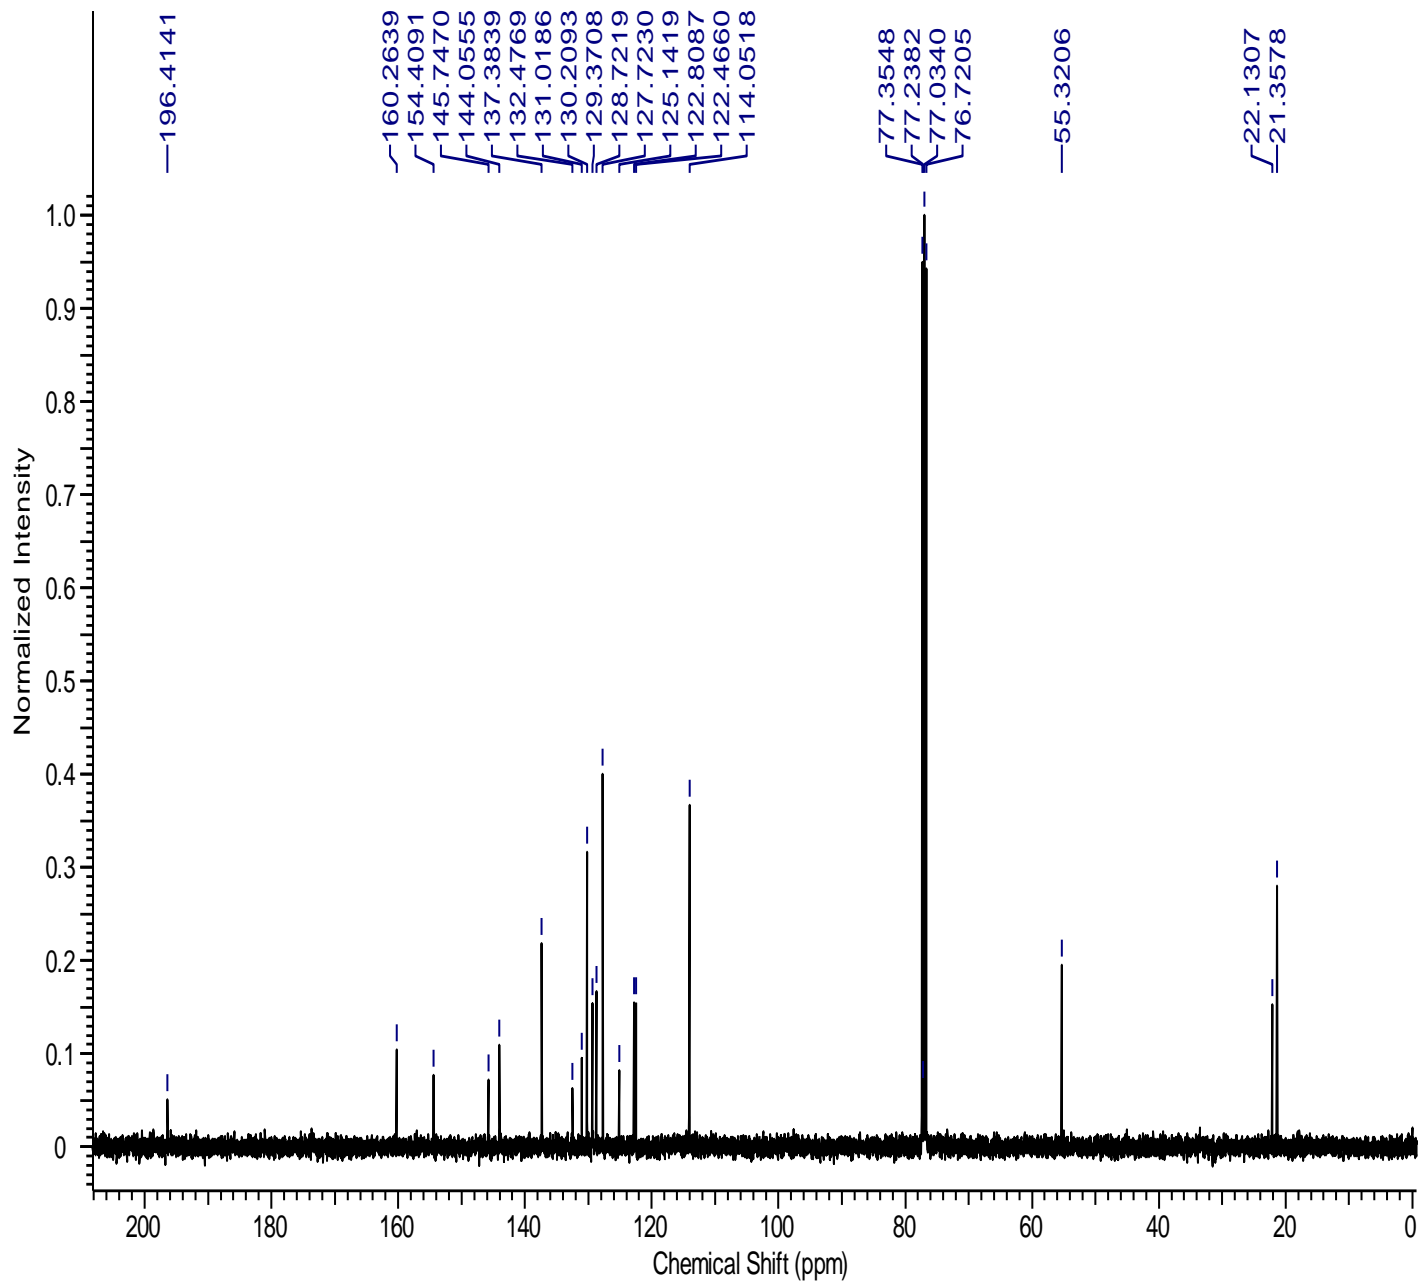

**$^1\text{H}$  (400 MHz) and  $^{13}\text{C}$  (100 MHz) NMR in  $\text{CDCl}_3$  of Compound 4l**

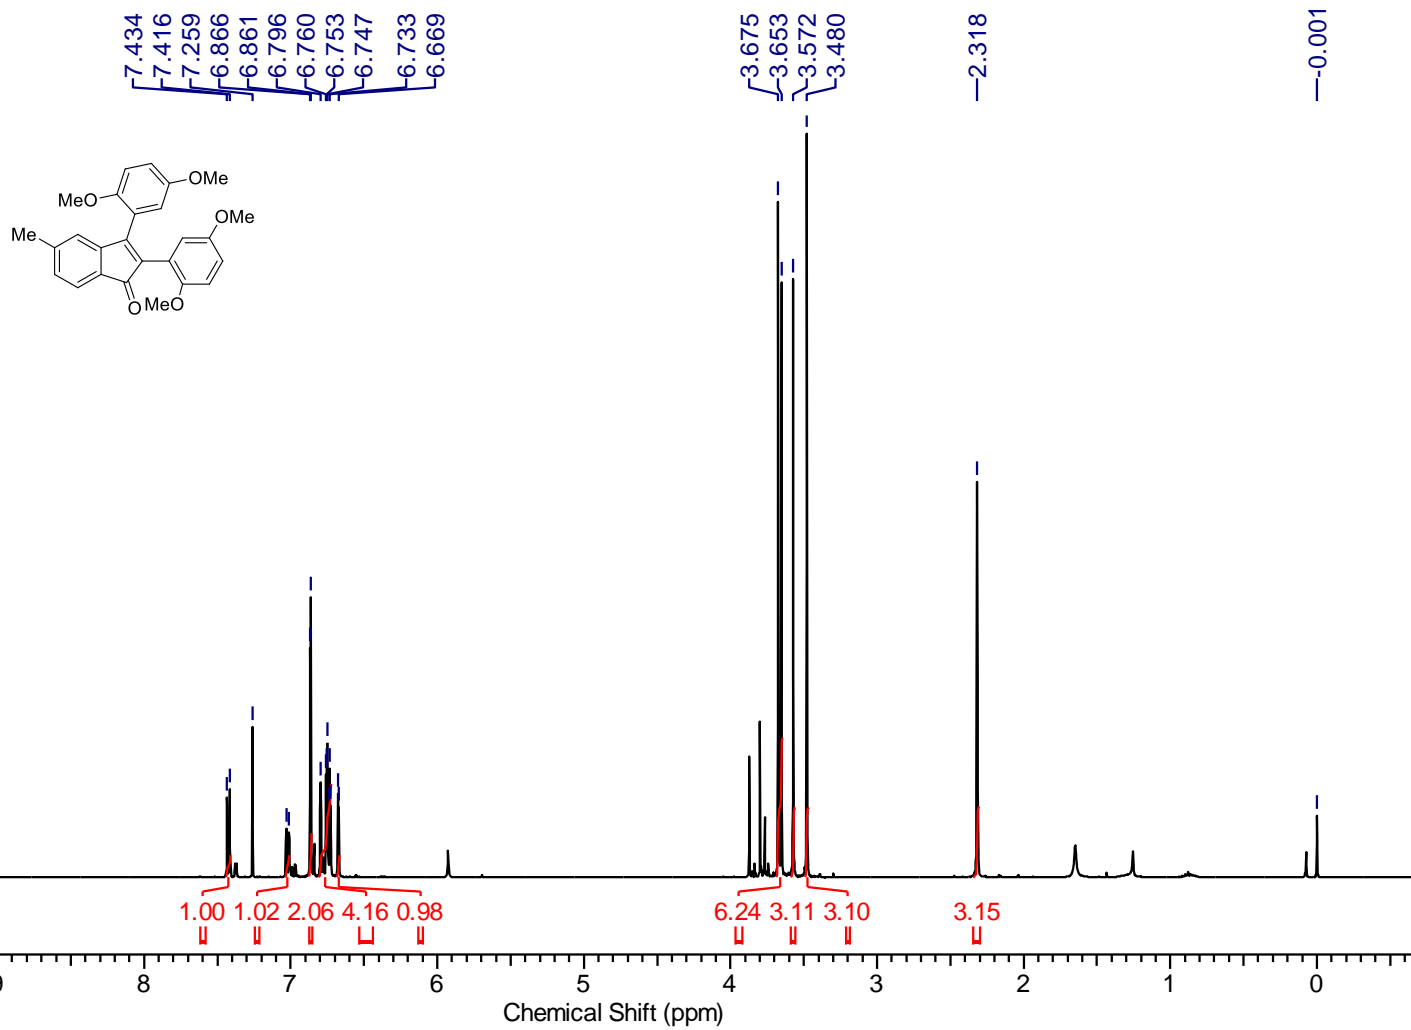



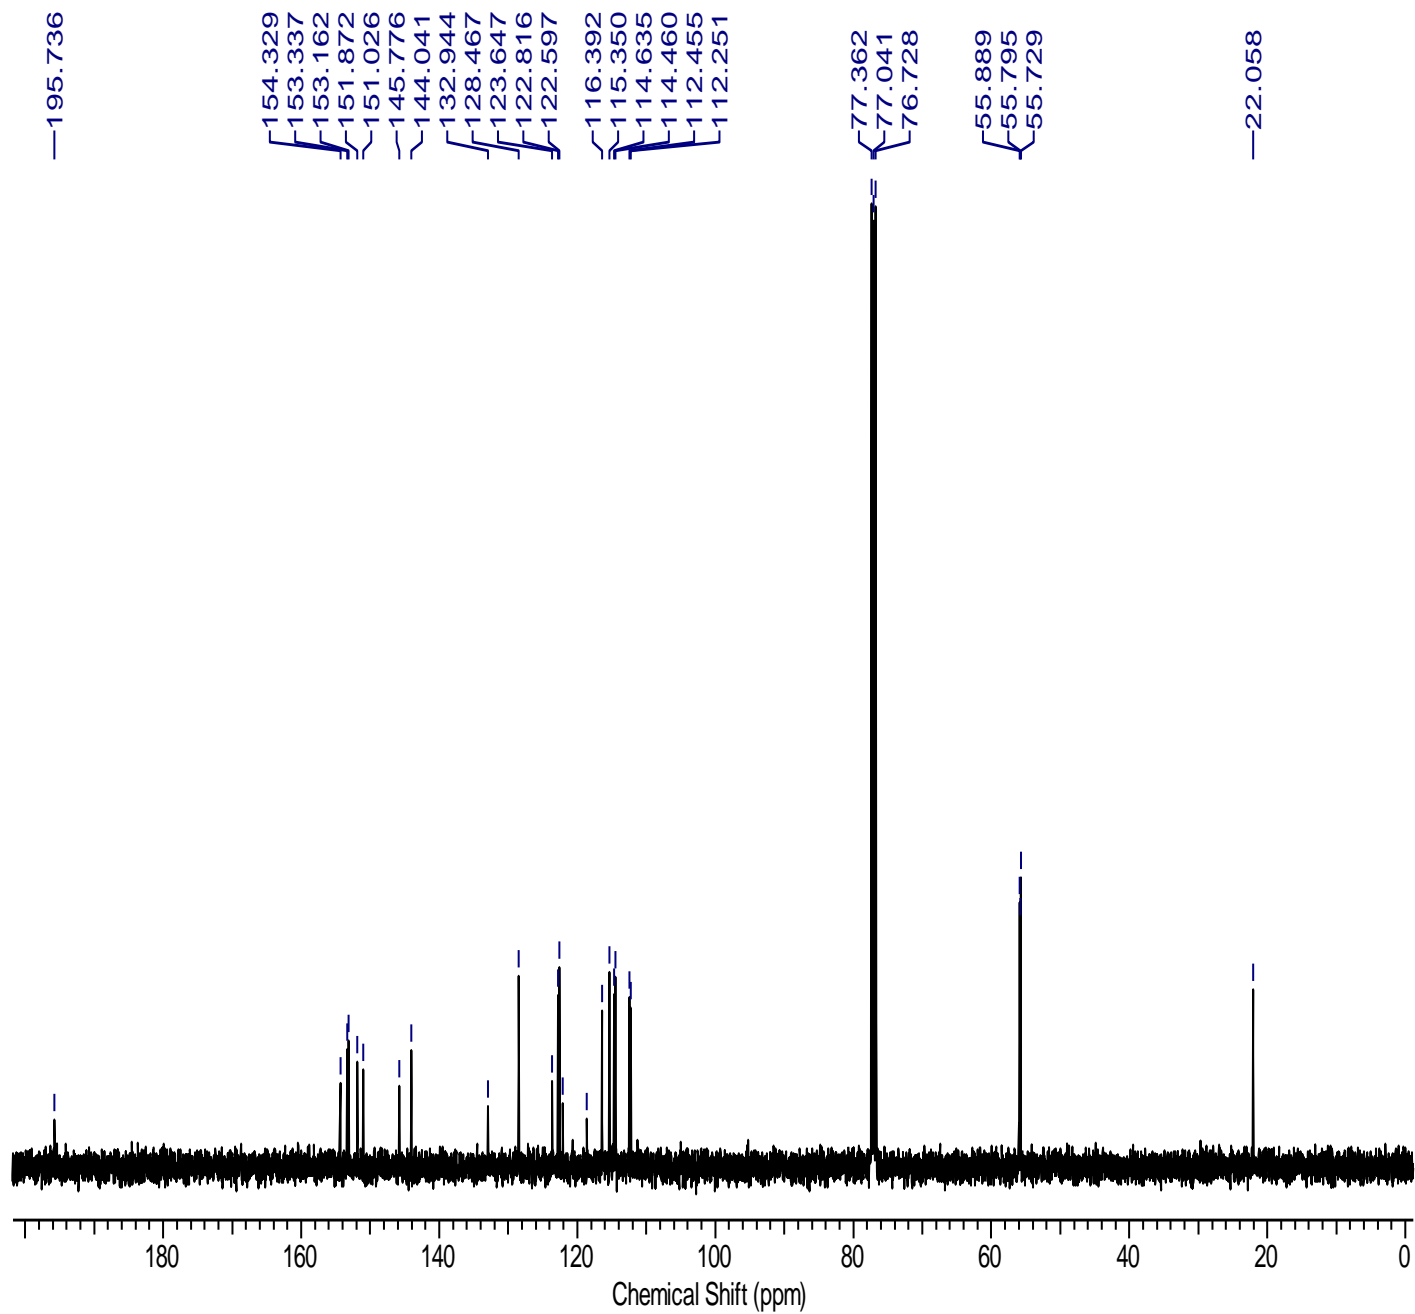

<sup>1</sup>H (400 MHz) and <sup>13</sup>C (100 MHz) NMR in CDCl<sub>3</sub> of Compound 4m

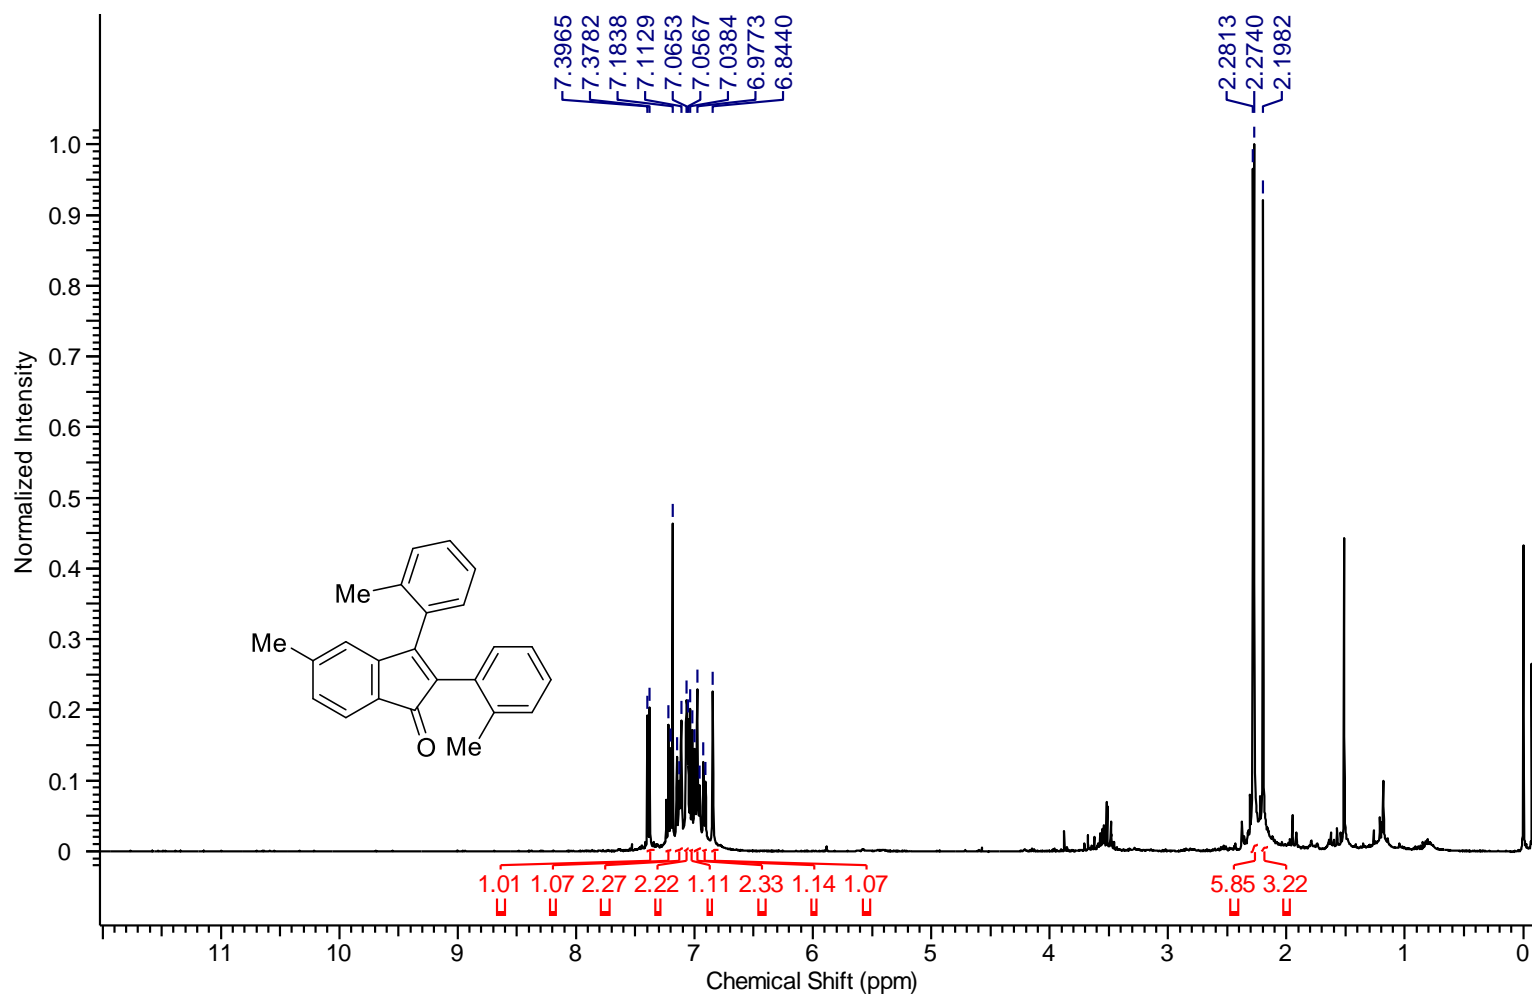

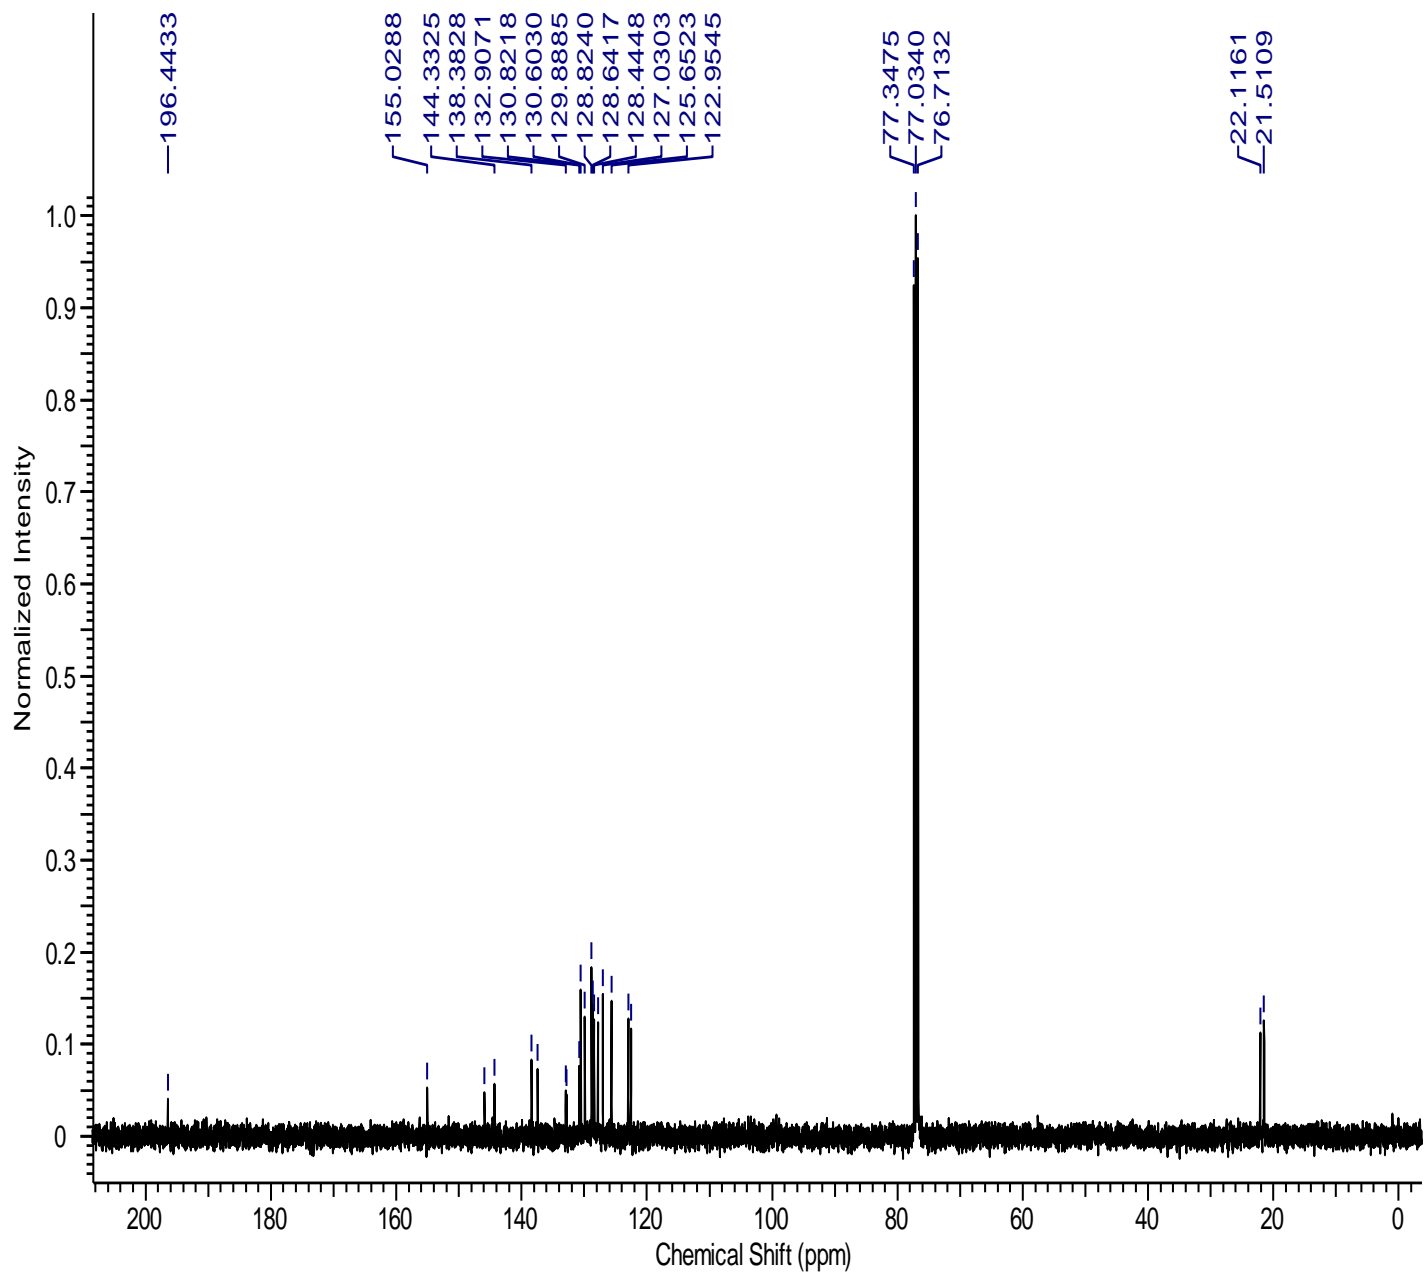

**<sup>1</sup>H (400 MHz) and <sup>13</sup>C (100 MHz) NMR in CDCl<sub>3</sub> of Compound 4n**

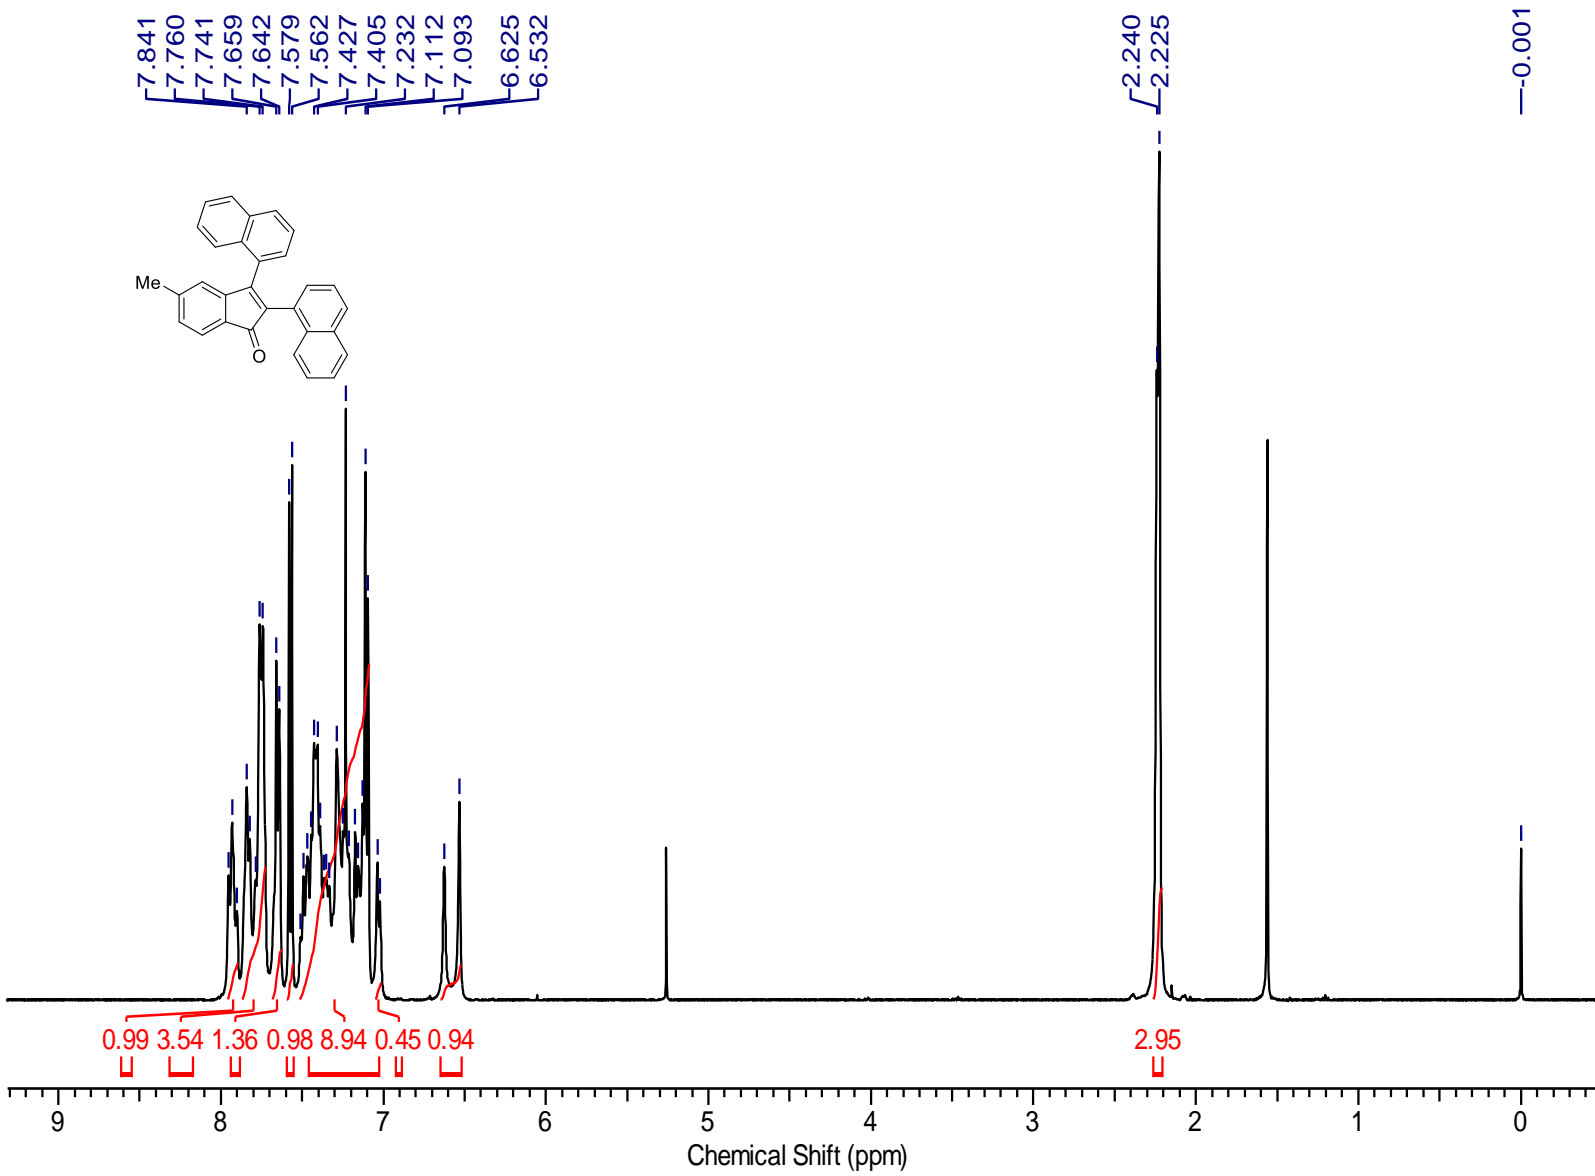

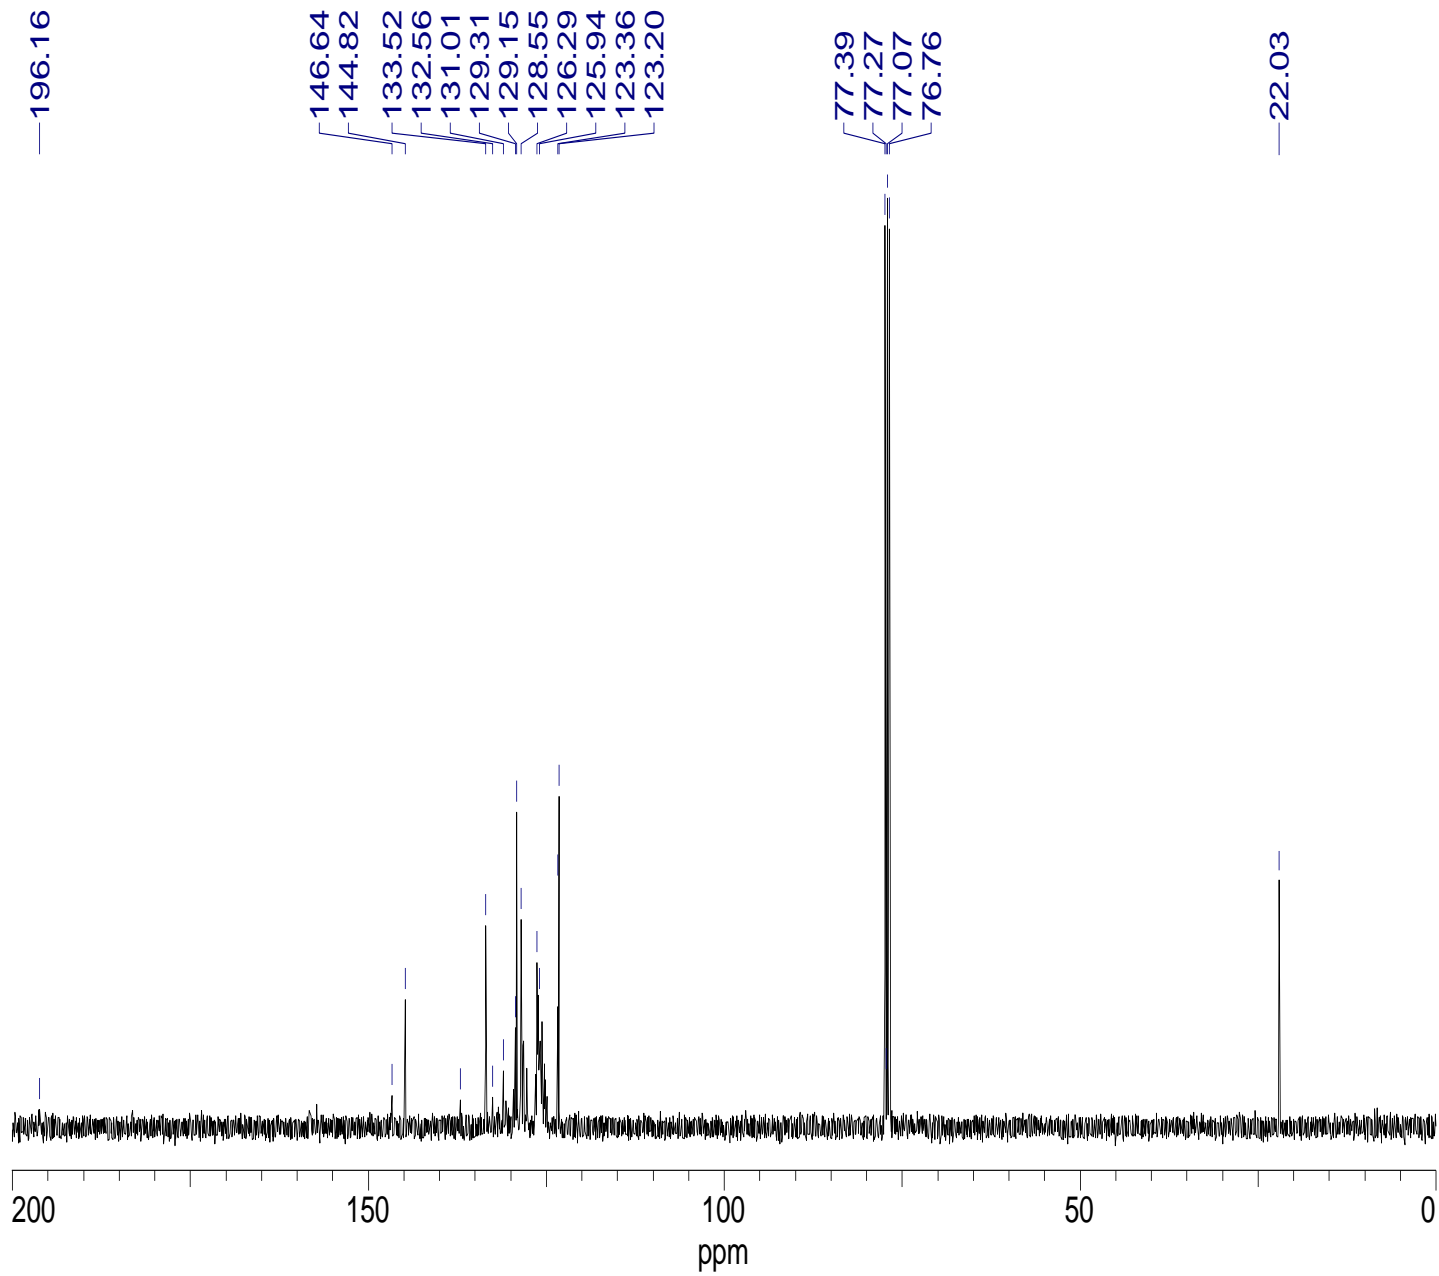

**<sup>1</sup>H (400 MHz) and <sup>13</sup>C (100 MHz) NMR in CDCl<sub>3</sub> of Compound 4o**

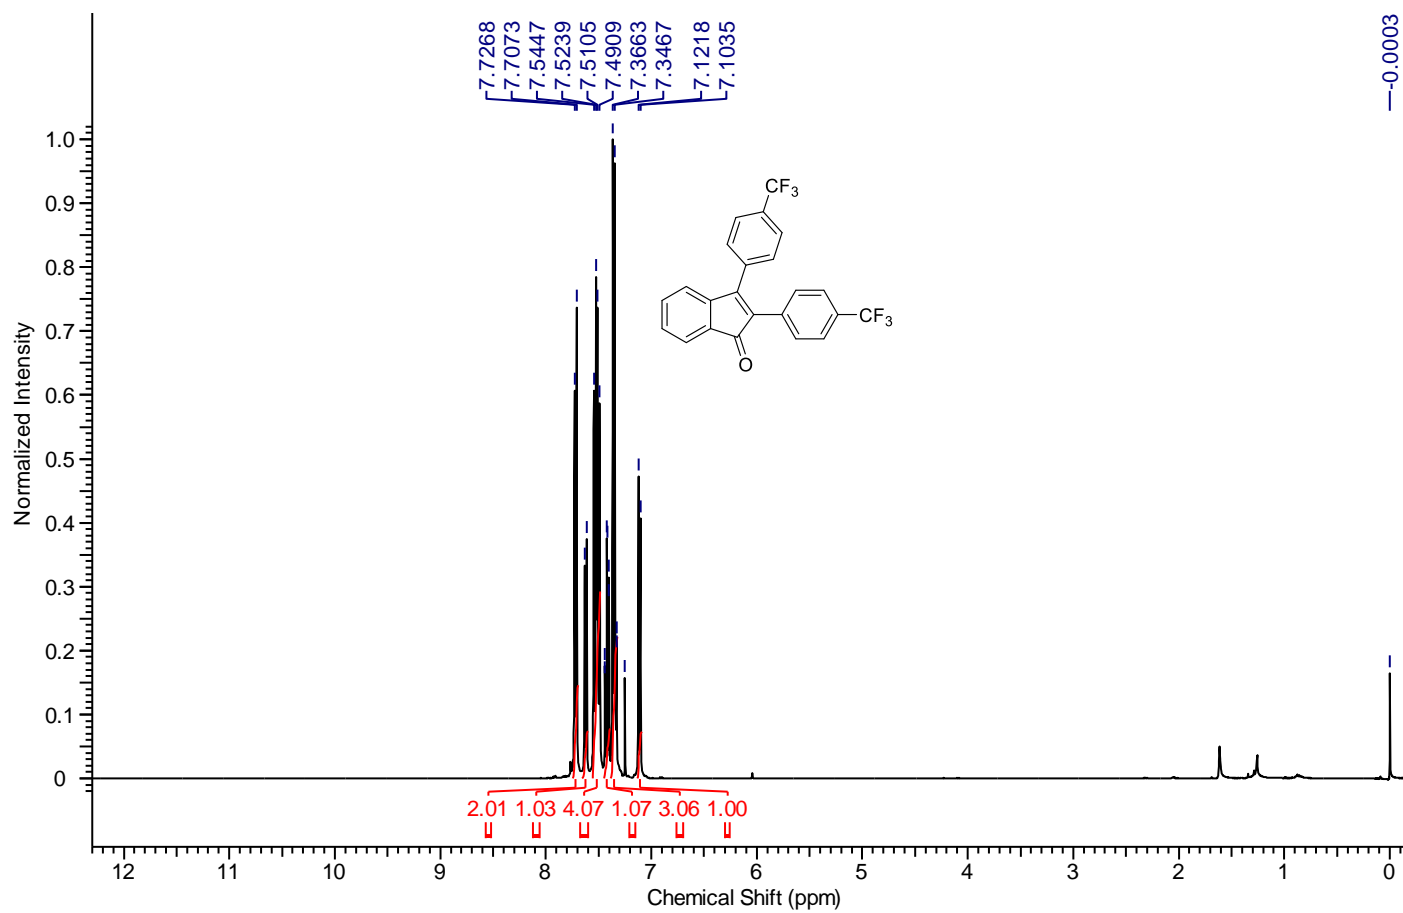

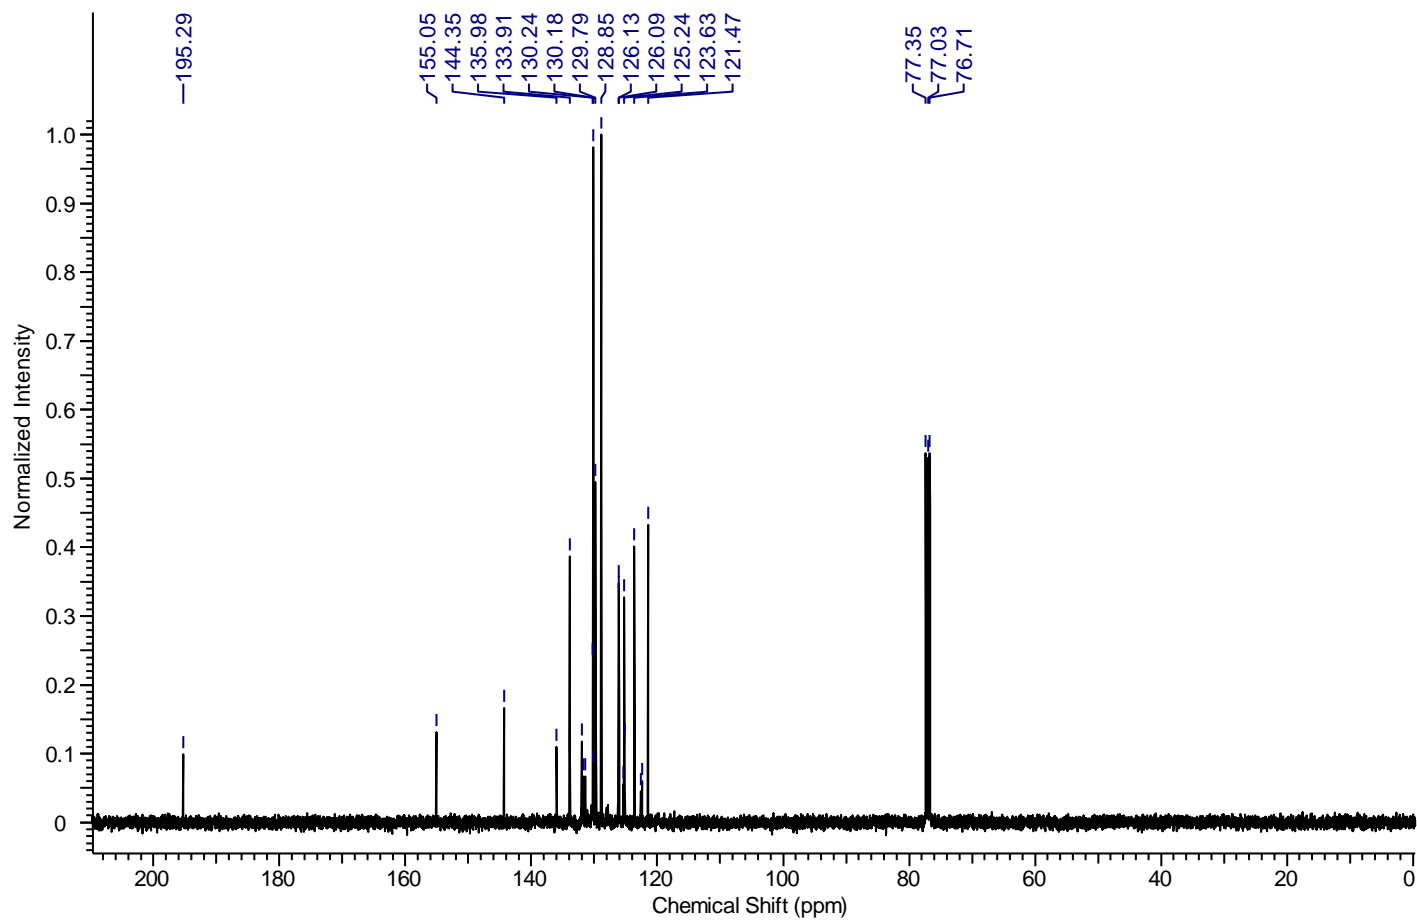

## 2. Single crystal X-ray data:

- X-ray crystal structure data for 1a,6a-di-m-tolyl-1a,6a-dihydro-6H-indeno[1,2-b]oxiren-6-one (2a): CCDC Number-2110069

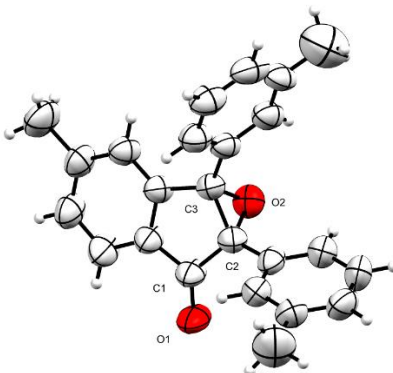

**Figure S1.** Perspective Drawing of **2a** with 40% Ellipsoid Probability.

Single crystals of **2a** was obtained by slow evaporation of chloroform-methanol solution at room temperature.

**Table S1. Single Crystallographic Data of 2a**

|                                    |                                                |
|------------------------------------|------------------------------------------------|
| Empirical formula                  | C <sub>24</sub> H <sub>20</sub> O <sub>2</sub> |
| Formula weight                     | 340.40                                         |
| Temperature/K                      | 293.0                                          |
| Crystal system                     | monoclinic                                     |
| Space group                        | P2 <sub>1</sub> /n                             |
| a/Å                                | 18.013(2)                                      |
| b/Å                                | 10.9258(16)                                    |
| c/Å                                | 19.1838(15)                                    |
| α/°                                | 90                                             |
| β/°                                | 93.691(7)                                      |
| γ/°                                | 90                                             |
| Volume/Å <sup>3</sup>              | 3767.7(8)                                      |
| Z                                  | 8                                              |
| ρ <sub>calc</sub> /cm <sup>3</sup> | 1.200                                          |
| μ/mm <sup>-1</sup>                 | 0.075                                          |



|                                             |                                                               |
|---------------------------------------------|---------------------------------------------------------------|
| F(000)                                      | 1440.0                                                        |
| Crystal size/mm <sup>3</sup>                | 0.08 × 0.06 × 0.04                                            |
| Radiation                                   | MoK $\alpha$ ( $\lambda$ = 0.71073)                           |
| 2 $\Theta$ range for data collection/°      | 5.87 to 58.21                                                 |
| Index ranges                                | -24 ≤ h ≤ 14, -14 ≤ k ≤ 13, -23 ≤ l ≤ 24                      |
| Reflections collected                       | 19874                                                         |
| Independent reflections                     | 8706 [R <sub>int</sub> = 0.0400, R <sub>sigma</sub> = 0.0702] |
| Data/restraints/parameters                  | 8706/0/475                                                    |
| Goodness-of-fit on F <sup>2</sup>           | 1.036                                                         |
| Final R indexes [I ≥ 2 $\sigma$ (I)]        | R <sub>1</sub> = 0.1144, wR <sub>2</sub> = 0.3373             |
| Final R indexes [all data]                  | R <sub>1</sub> = 0.2117, wR <sub>2</sub> = 0.4170             |
| Largest diff. peak/hole / e Å <sup>-3</sup> | 1.11/-0.41                                                    |

- **X-ray crystal structure data for 2-hydroxy-5-methyl-2,3-diphenyl-2,3-dihydro-1H-inden-1-one (3ab): CCDC Number-2110074**

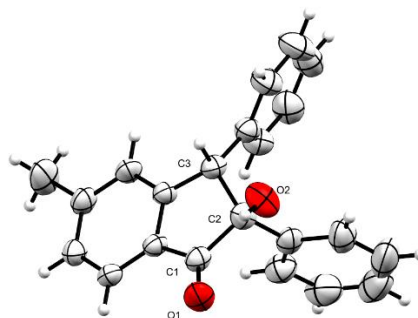

**Figure S2.** Perspective Drawing of **3ab** with 40% Ellipsoid Probability.

Single crystals of **3ab** was obtained by slow evaporation of DCM-Hexane solution at room temperature.

**Table S2.** Single Crystallographic Data of **3ab**.

|                   |                                                |
|-------------------|------------------------------------------------|
| Empirical formula | C <sub>22</sub> H <sub>18</sub> O <sub>2</sub> |
| Formula weight    | 314.36                                         |
| Temperature/K     | 301.41(10)                                     |
| Crystal system    | monoclinic                                     |

|                                             |                                                               |
|---------------------------------------------|---------------------------------------------------------------|
| Space group                                 | P2 <sub>1</sub> /n                                            |
| a/Å                                         | 8.6355(11)                                                    |
| b/Å                                         | 6.4732(8)                                                     |
| c/Å                                         | 30.237(3)                                                     |
| α/°                                         | 90                                                            |
| β/°                                         | 91.300(11)                                                    |
| γ/°                                         | 90                                                            |
| Volume/Å <sup>3</sup>                       | 1689.8(4)                                                     |
| Z                                           | 4                                                             |
| ρ <sub>calc</sub> /cm <sup>3</sup>          | 1.236                                                         |
| μ/mm <sup>-1</sup>                          | 0.078                                                         |
| F(000)                                      | 664.0                                                         |
| Crystal size/mm <sup>3</sup>                | 0.18 × 0.14 × 0.12                                            |
| Radiation                                   | Mo Kα (λ = 0.71073)                                           |
| 2Θ range for data collection/°              | 6.144 to 58.06                                                |
| Index ranges                                | -11 ≤ h ≤ 9, -8 ≤ k ≤ 8, -40 ≤ l ≤ 38                         |
| Reflections collected                       | 15595                                                         |
| Independent reflections                     | 3961 [R <sub>int</sub> = 0.1080, R <sub>sigma</sub> = 0.0752] |
| Data/restraints/parameters                  | 3961/0/219                                                    |
| Goodness-of-fit on F <sup>2</sup>           | 1.097                                                         |
| Final R indexes [I >= 2σ (I)]               | R <sub>1</sub> = 0.1086, wR <sub>2</sub> = 0.2983             |
| Final R indexes [all data]                  | R <sub>1</sub> = 0.1361, wR <sub>2</sub> = 0.3138             |
| Largest diff. peak/hole / e Å <sup>-3</sup> | 0.35/-0.29                                                    |

- **X-ray crystal structure data for 2-hydroxy-5-methyl-2,3-di-*p*-tolyl-2,3-dihydro-1*H*-inden-1-one (3ac): CCDC Number-2109773**

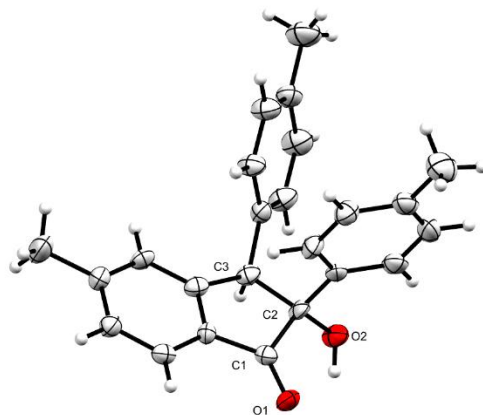

**Figure S3.** Perspective Drawing of **3ac** with 40% Ellipsoid Probability.

Single crystals of **3ac** was obtained by slow evaporation of DCM-Hexane solution at room temperature.

**Table 3. Single Crystallographic Data of 3ac.**

|                                    |                                                |
|------------------------------------|------------------------------------------------|
| Empirical formula                  | C <sub>24</sub> H <sub>22</sub> O <sub>2</sub> |
| Formula weight                     | 342.16                                         |
| Temperature/K                      | 296.15                                         |
| Crystal system                     | monoclinic                                     |
| Space group                        | P2 <sub>1</sub> /n                             |
| a/Å                                | 8.739(5)                                       |
| b/Å                                | 6.410(4)                                       |
| c/Å                                | 33.594(18)                                     |
| α/°                                | 90                                             |
| β/°                                | 94.590(17)                                     |
| γ/°                                | 90                                             |
| Volume/Å <sup>3</sup>              | 1875.7(18)                                     |
| Z                                  | 8                                              |
| ρ <sub>calc</sub> /cm <sup>3</sup> | 1.213                                          |
| μ/mm <sup>-1</sup>                 | 0.076                                          |

|                                                  |                                                               |
|--------------------------------------------------|---------------------------------------------------------------|
| F(000)                                           | 728.0                                                         |
| Crystal size/mm <sup>3</sup>                     | 0.027 × 0.023 × 0.012                                         |
| Radiation                                        | MoK $\alpha$ ( $\lambda$ = 0.71073)                           |
| 2 $\Theta$ range for data collection/ $^{\circ}$ | 2.432 to 56.67                                                |
| Index ranges                                     | -6 ≤ h ≤ 11, -8 ≤ k ≤ 8, -32 ≤ l ≤ 44                         |
| Reflections collected                            | 7261                                                          |
| Independent reflections                          | 4476 [R <sub>int</sub> = 0.1120, R <sub>sigma</sub> = 0.2695] |
| Data/restraints/parameters                       | 4476/0/240                                                    |
| Goodness-of-fit on F <sup>2</sup>                | 0.901                                                         |
| Final R indexes [I ≥ 2 $\sigma$ (I)]             | R <sub>1</sub> = 0.0828, wR <sub>2</sub> = 0.1533             |
| Final R indexes [all data]                       | R <sub>1</sub> = 0.2604, wR <sub>2</sub> = 0.2431             |
| Largest diff. peak/hole / e $\text{\AA}^{-3}$    | 0.42/-0.48                                                    |
